# Supplementary material for: Selective de-repression of germ cell-specific genes in mouse embryonic fibroblasts in a permissive epigenetic environment
Source: PubMed Central journal article supplement (PMC5016969; doi:10.1038/srep32932), 2016-09-09
Supplement: srep32932-s1.pdf [file srep32932-s1.pdf]

**Selective de-repression of germ cell-specific genes in mouse embryonic fibroblasts in a permissive epigenetic environment**

Tamotsu Sekinaka, Youhei Hayashi, Toshiaki Noce, Hitoshi Niwa, Yasuhisa Matsui

**Supplementary Figure S1 A flow chart showing our strategy to explore conditions for inducing germ cell-specific genes**

**Supplementary Figure S2 Knockdown efficiency of Max, Ezh1, Ezh2 and Dnmt1 by RNAi**

The expression of germ cell-specific genes was quantified by real-time PCR in MEFs after 2 days in culture under OCKS+Ctrl siRNA, OCKS+*Max*-KD, OCKS+Ezh1 KD, OCKS+Ezh2 KD or OCKS+Dnmt1 KD conditions. The expression in MEFs with OCKS+Ctrl siRNA was set as 1.0. The data were obtained by a single experiment.

**Supplementary Figure S3 Quantification of germ cell-specific genes expression in OCKS+*Max*-KD with or without VAP and ALK5i conditions**

The expression of germ cell-specific genes was quantified by real-time PCR in MEFs after 2 days in culture under OCKS+Ctrl siRNA or OCKS+*Max*-KD conditions with or without VPA and ALK5i (VA5). The expression in MEFs with OCKS+*Max*-KD was set as 1.0. Error bars, S.E. of three biological replicates, \* $p < 0.05$ , \*\* $p < 0.01$ , \*\*\* $p < 0.001$  (Student's t-test).

**Supplementary Figure S4 The expression of Vasa in MEFs following inhibition of epigenetic modifications by RNAi or by small-molecule compounds**

(a) The expression of *Vasa* in MEFs after 2 days in culture in OCKS+Ctrl siRNA, OCKS+Ezh1- and Ezh2-KD, OCKS+*Max*-, Ezh1- and Ezh2-KD or OCKS+*Max*- and *Atf7ip*-KD conditions was quantified by real-time PCR. The expression in MEFs with OCKS+Ctrl siRNA was set as 1.0.

(b) The expression of *Vasa* in MEFs after 2 days in culture in OCKS+Ctrl siRNA, OCKS+*Max*- and *Atf7ip*-KD, or OCKS+*Max*- and *Atf7ip*-KD with VPA and ALK5i (VA5) conditions. The expression in MEFs with OCKS+Ctrl siRNA was set as 1.0.

(c) The expression of *Vasa* in MEFs after 2 days in culture in OCKS with or without chem+VA5. DMSO was added to control cells. The expression in MEFs in OCKS+DMSO condition was set as 1.0. The data were obtained by a single experiment.

**Supplementary Figure S5 The germ cell-specific genes were significantly upregulated in OS+chem+VA5+Dnmt1-KD condition**

(a) The expression of germ cell-specific genes in MEFs after 2 days in culture in OCKS+Ctrl siRNA, OCKS+*Max*<sup>-</sup> and *Atf7ip*-KD+VA5, or OCKS+chem+VA5, with inhibition of DNA methylation by *Dnmt1*-KD or by 5-Aza-cytidine (Aza) conditions. The expression in MEFs with OCKS+chem+VA5+*Dnmt1*-KD quantified by real-time PCR was set as 1.0.

(b) The expression of somatic genes (*Hoxa1* and *Hoxb1*) in MEFs 2 days in culture in OCKS+Ctrl siRNA or OCKS+chem+VA5+*Dnmt1*-KD conditions. The expression in MEFs with OCKS+chem+VA5+*Dnmt1*-KD was set as 1.0.

Error bars: S.E. of three biological replicates, \*p<0.05, \*\*p<0.01, \*\*\*p<0.001 (Student's t-test).

**Supplementary Figure S6 Change of Vasa expression in MEFs in OCKS+chem+VA5+Dnmt1 KD condition after prolonged culture**

The expression of *Vasa* was quantified by real-time PCR in MEFs after transfection of the expression vector encoding the Yamanaka factors (*Oct4*, *c-Myc*, *Klf4*, *Sox2*) with or without tranylcipromine, BIX-01294, DZNep (chem), VPA, ALK5i (VA5), and *Dnmt1* Knocked-Down (KD) (OCKS+chem+VA5+*Dnmt1* KD, or OCKS+Ctrl siRNA) after 2, 4, 6 days in culture. The expression level of *Vasa* in MEFs with OCKS+chem+VA5+*Dnmt1* KD was set as 1.0. The data were obtained by a single experiment.

**Supplementary Figure S7 The expression of Dazl protein was significantly induced in MEFs in the OCKS+chem+VA5+Dnmt1-KD condition**

(a) Immuno-fluorescence staining of MEFs after 4 days in culture in OCKS+chem+VA5+*Dnmt1*-KD or OCKS+Ctrl siRNA conditions using anti-Dazl antibody. The shown data are representative of data from three independent experiments. Red: anti-Dazl, Blue: DAPI, Scale bar: 200  $\mu$ m.

(b) The ratios of number of Dazl-positive cells in DAPI-positive cells. Dazl- and DAPI-positive cells were estimated by image J. Error bars: S. E. of three biological

replicates, \*p<0.05.

**Supplementary Figure S8 Transcriptome analysis of MEFs cultured in OCKS+chem+VA5+Dnmt1-KD conditions**

(a) The ratios of number of up- and downregulation genes in MEFs after 4 days in OCKS+chem+VA5+Dnmt1-KD condition compared with in control MEFs. Genes with at least two-fold changes in expression (p<0.001) were analyzed.

(b) The ratios of upregulated genes annotated with particular GO terms.

(c) The ratios of downregulated genes annotated with particular GO terms.

(d) Relationship of upregulated genes in E13.5 male PGCs and in the treated MEFs compared with in control MEFs.

(e) GO analysis in commonly upregulated genes in E13.5 male PGCs and in the treated MEFs compared with in control MEFs. The GO terms with corrected p-value <0.05 are shown.

The array data were obtained from three biological replicates.

**Supplementary Figure S9 The expression of Dazl, Tex19.1 and Sycp1 in the OS+chem+VA5+Dnmt1-KD condition**

Scatter plot of meiosis-related genes at least two-fold upregulated in MEFs in OS+chem+V.A+Dnmt1-KD condition compared with in control MEFs.

**Supplementary Figure S10 The expression of germ cell-specific genes in E13.5 male PGCs**

(a) The expression of Vasa in E13.5 male (♂) PGC and in MEFs after 2 days in culture with OCKS+Max- and Atf7ip-KD+VA5 or OCKS+chem+VA5 treatment. The expression in MEFs in OCKS+Max- and Atf7ip-KD+VA5 or OCKS+chem+VA5 condition was set as 1.0. The data were obtained by a single experiment.

(b) The expression of Dazl, Tex19.1 and Sycp1 in E13.5 ♂ PGC and in MEFs after 4 days in culture with OS+chem+VA5+Dnmt1 KD treatment. The expression in MEFs in OS+chem+VA5+Dnmt1 KD condition was set as 1.0. Error bars: S. E. of three biological replicates, \*\*\*p<0.001 (Student's t-test).

The expression of germ cell-specific genes was quantified by real-time PCR.

**Supplementary Figure S11 The effect of OS for the expression of *Dazl*, *Tex19.1* and *Sycp1* in the ALK5i, DZNep, *Dnmt1* KD condition**

The expression of *Dazl*, *Tex19.1* and *Sycp1* in MEFs after 4 days in culture under ALK5i+DZNep+*Dnmt1*-KD or OS+ALK5i+DZNep+*Dnmt1*-KD conditions. The expression in MEFs in the OS+ALK5i+DZNep+*Dnmt1*-KD condition was set as 1.0. The expression of *Dazl*, *Tex19.1* and *Sycp1* was quantified by real-time PCR. The data were obtained by a single experiment.

**Supplementary Figure S12 Changes of histone modification status in the OS+chem+VA5+*Dnmt1*-KD condition**

ChIP analysis of the promoter regions of *Dazl*, *Tex19.1*, and *Sycp1* for H3K4me3 and H3K27me3 in MEFs 4 days after the OS+chem+VA5+*Dnmt1*-KD treatment or in control MEFs. ChIP using normal IgG was used as a negative control. Levels of H3K4me3 or H3K27me3 were determined by real-time PCR, and the percentages of values relative to those for input chromatin are shown. Other data from two independent experiments are also shown in Fig. 6b.

**Supplementary Figure S13 Immuno-staining of Vasa protein in MEFs cultured with OS+chem+VA5+*Dnmt1* KD**

Immuno-fluorescence staining of MEFs after 4 days in culture in OCKS+chem+VA5+*Dnmt1*-KD or OCKS+Ctrl siRNA conditions using anti-Vasa antibody. Red: anti-Vasa, Blue: DAPI, Scale bar: 100  $\mu$ m. VR15 ES cells after *Max* knock-down (*Max*-KD VR15 ESC) were used for positive control of the immuno-staining.

**Supplementary Figure S14 Immuno-staining of Sycp3 protein in OS+chem+VA5+*Dnmt1* KD**

Immuno-fluorescence staining of MEFs after 4 days in culture in OCKS+chem+VA5+*Dnmt1*-KD or OCKS+Ctrl siRNA conditions using anti-Sycp3 antibody. Red: anti-Sycp3, Blue: DAPI, Scale bar: 100  $\mu$ m. VR15 ES cells after *Max* knock-down (*Max*-KD VR15 ESC) were used for positive control of the immuno-staining.

**Supplementary Figure S15 The effect of OCKS+chem+VA5+Dnmt1-KD condition for reprogramming of MEFs to iPSCs.**

(a) The expression of typical pluripotency markers, the Oct4 $\Delta$ PE-GFP reporter and alkaline phosphatase (ALP) activity in MEFs cultured in the OCKS+Ctrl siRNA treatment for 15 days. The shown data are representative of three independent experiments. Scale bar: 200  $\mu$ m.

(b) The number of Oct4 $\Delta$ PE-GFP- or ALP-positive colonies in OCKS+Ctrl siRNA or OCKS+chem+VA5+Dnmt1 KD treatment for 15 days. Error bars: S. E. of three biological replicates, \*p<0.05.

**Supplementary Figure S16 The expression of *Blimp1* in OS+chem+VA5+Dnmt1 KD treated MEFs after cultured in the PGCLC culture condition**

The MEFs cultured in OS+chem+VA5+Dnmt1 KD for 4 days were further cultured in the PGCLC culture condition for 6 days. The expression of *Blimp1* was quantified by real-time PCR. The expression in MEFs after 4 days in culture in OS+chem+VA5+Dnmt1 KD was set as 1.0. The data were obtained by a single experiment.

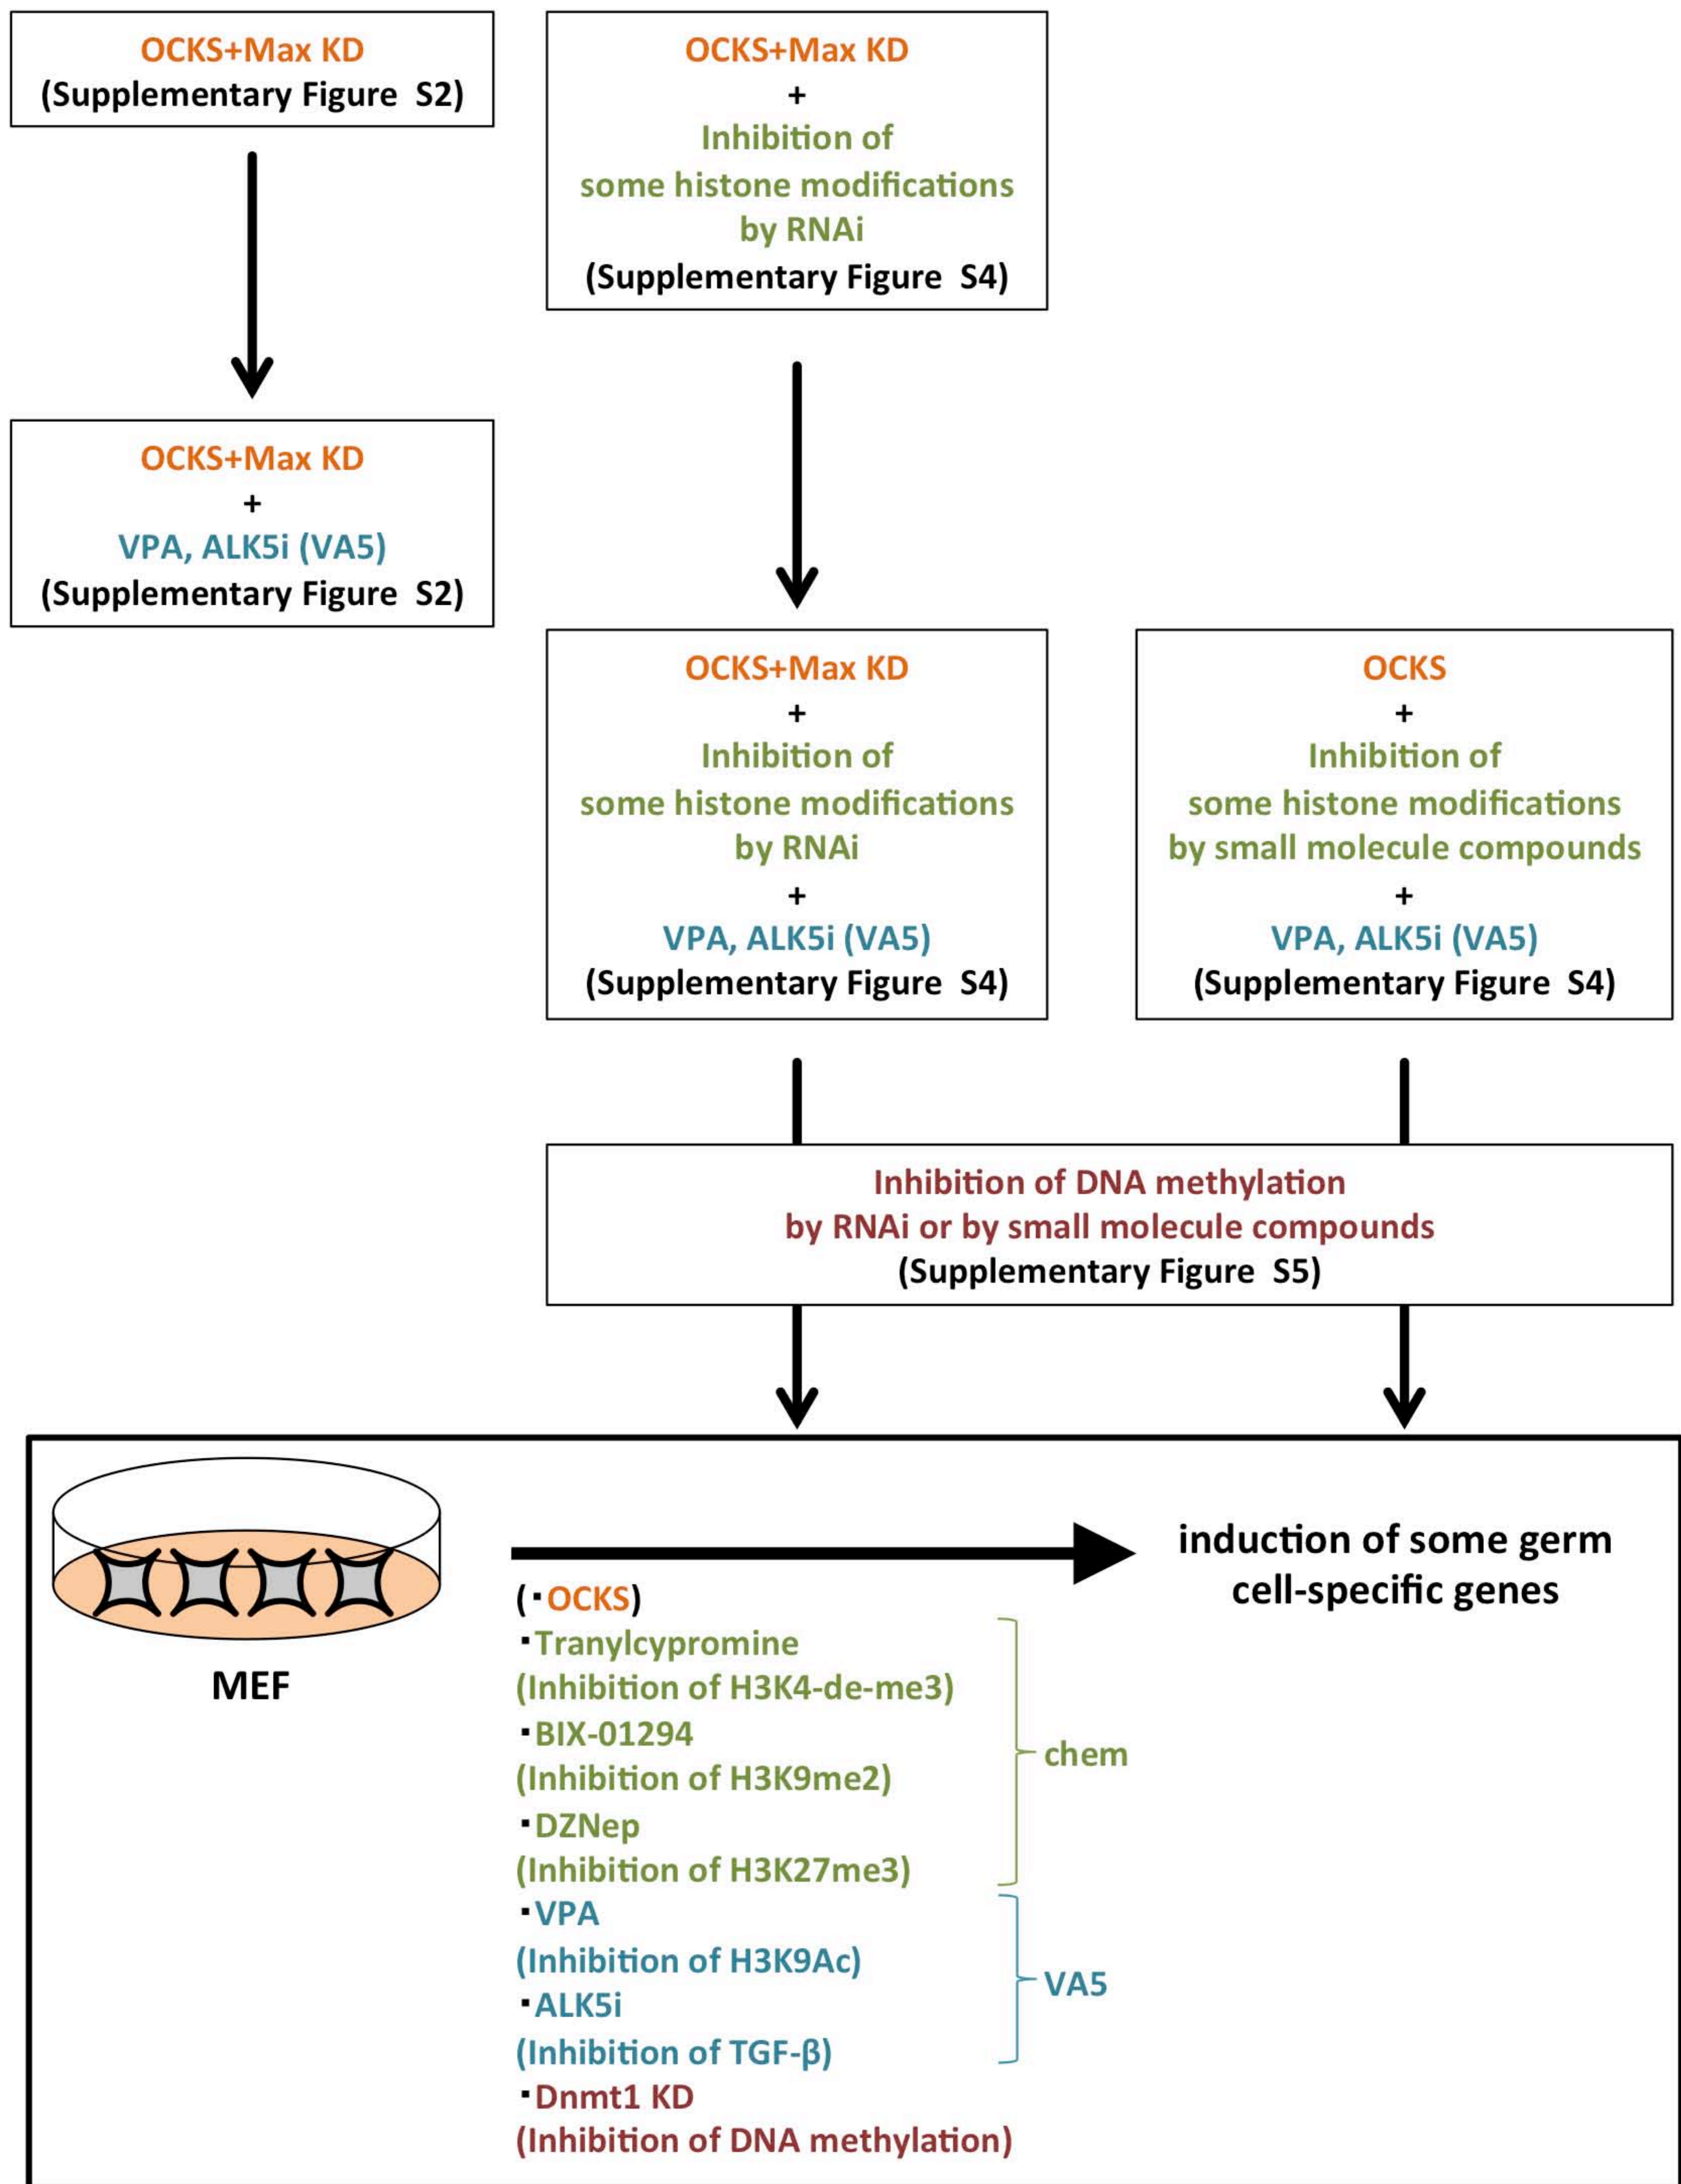

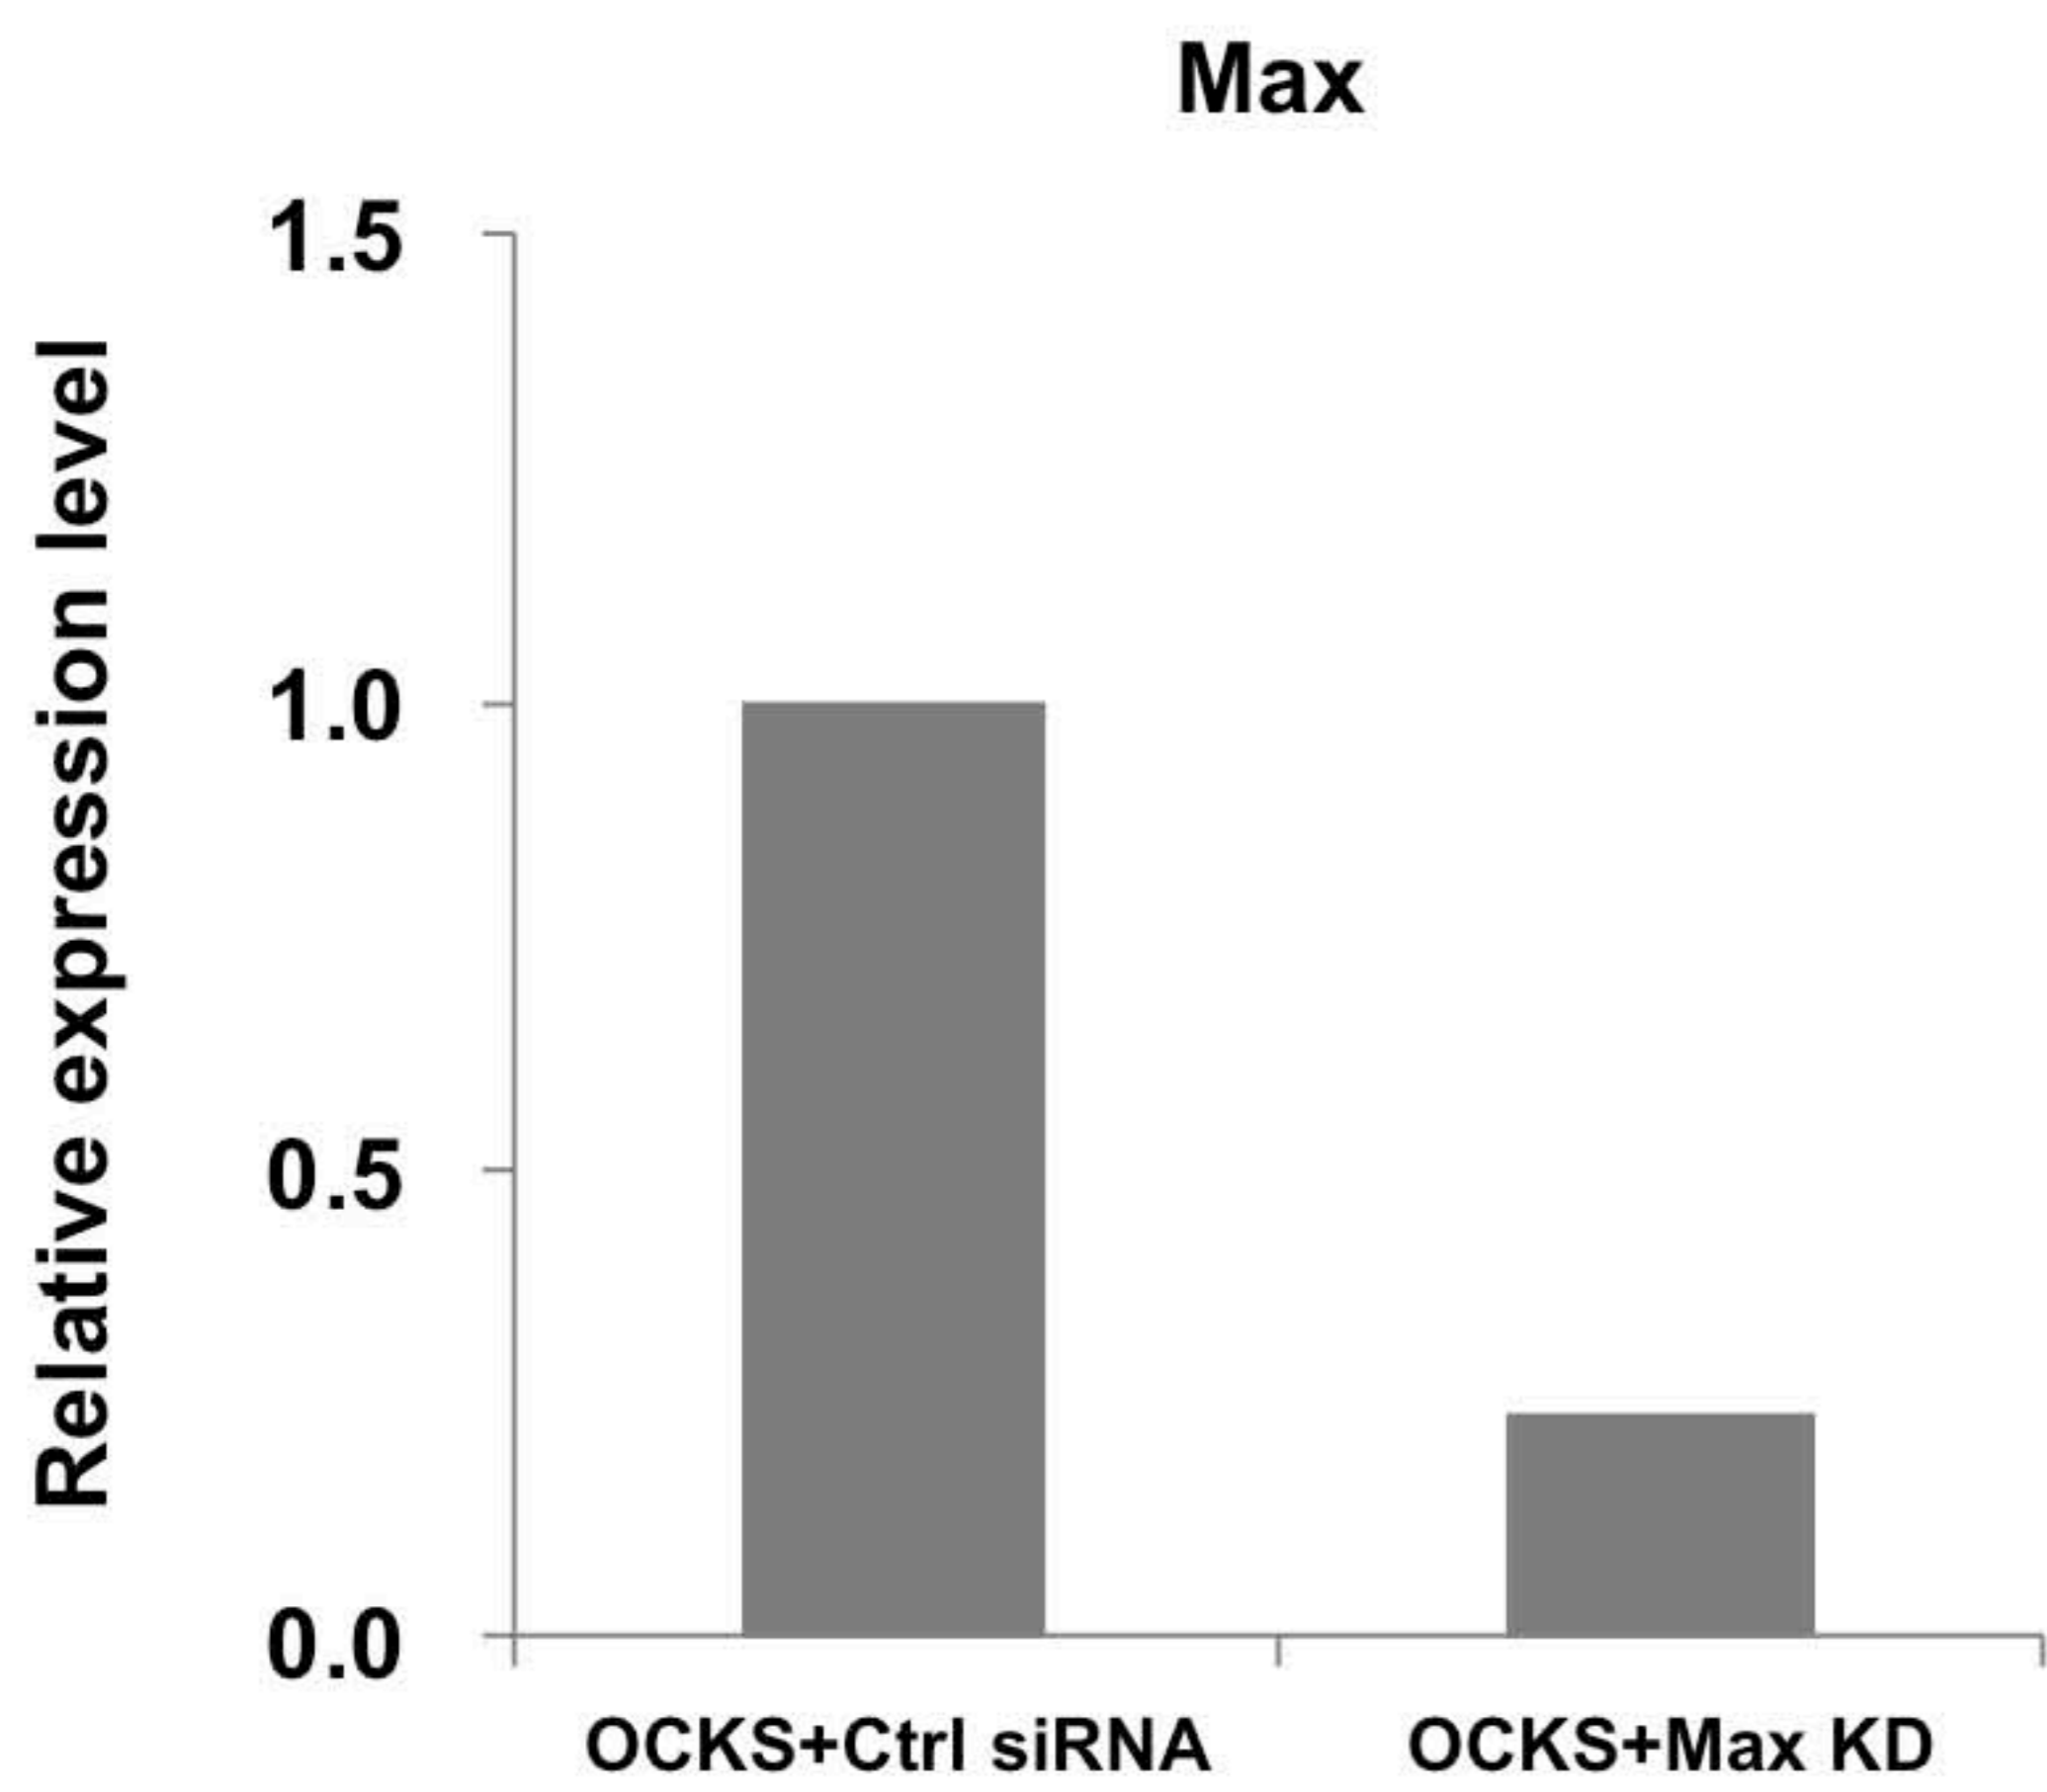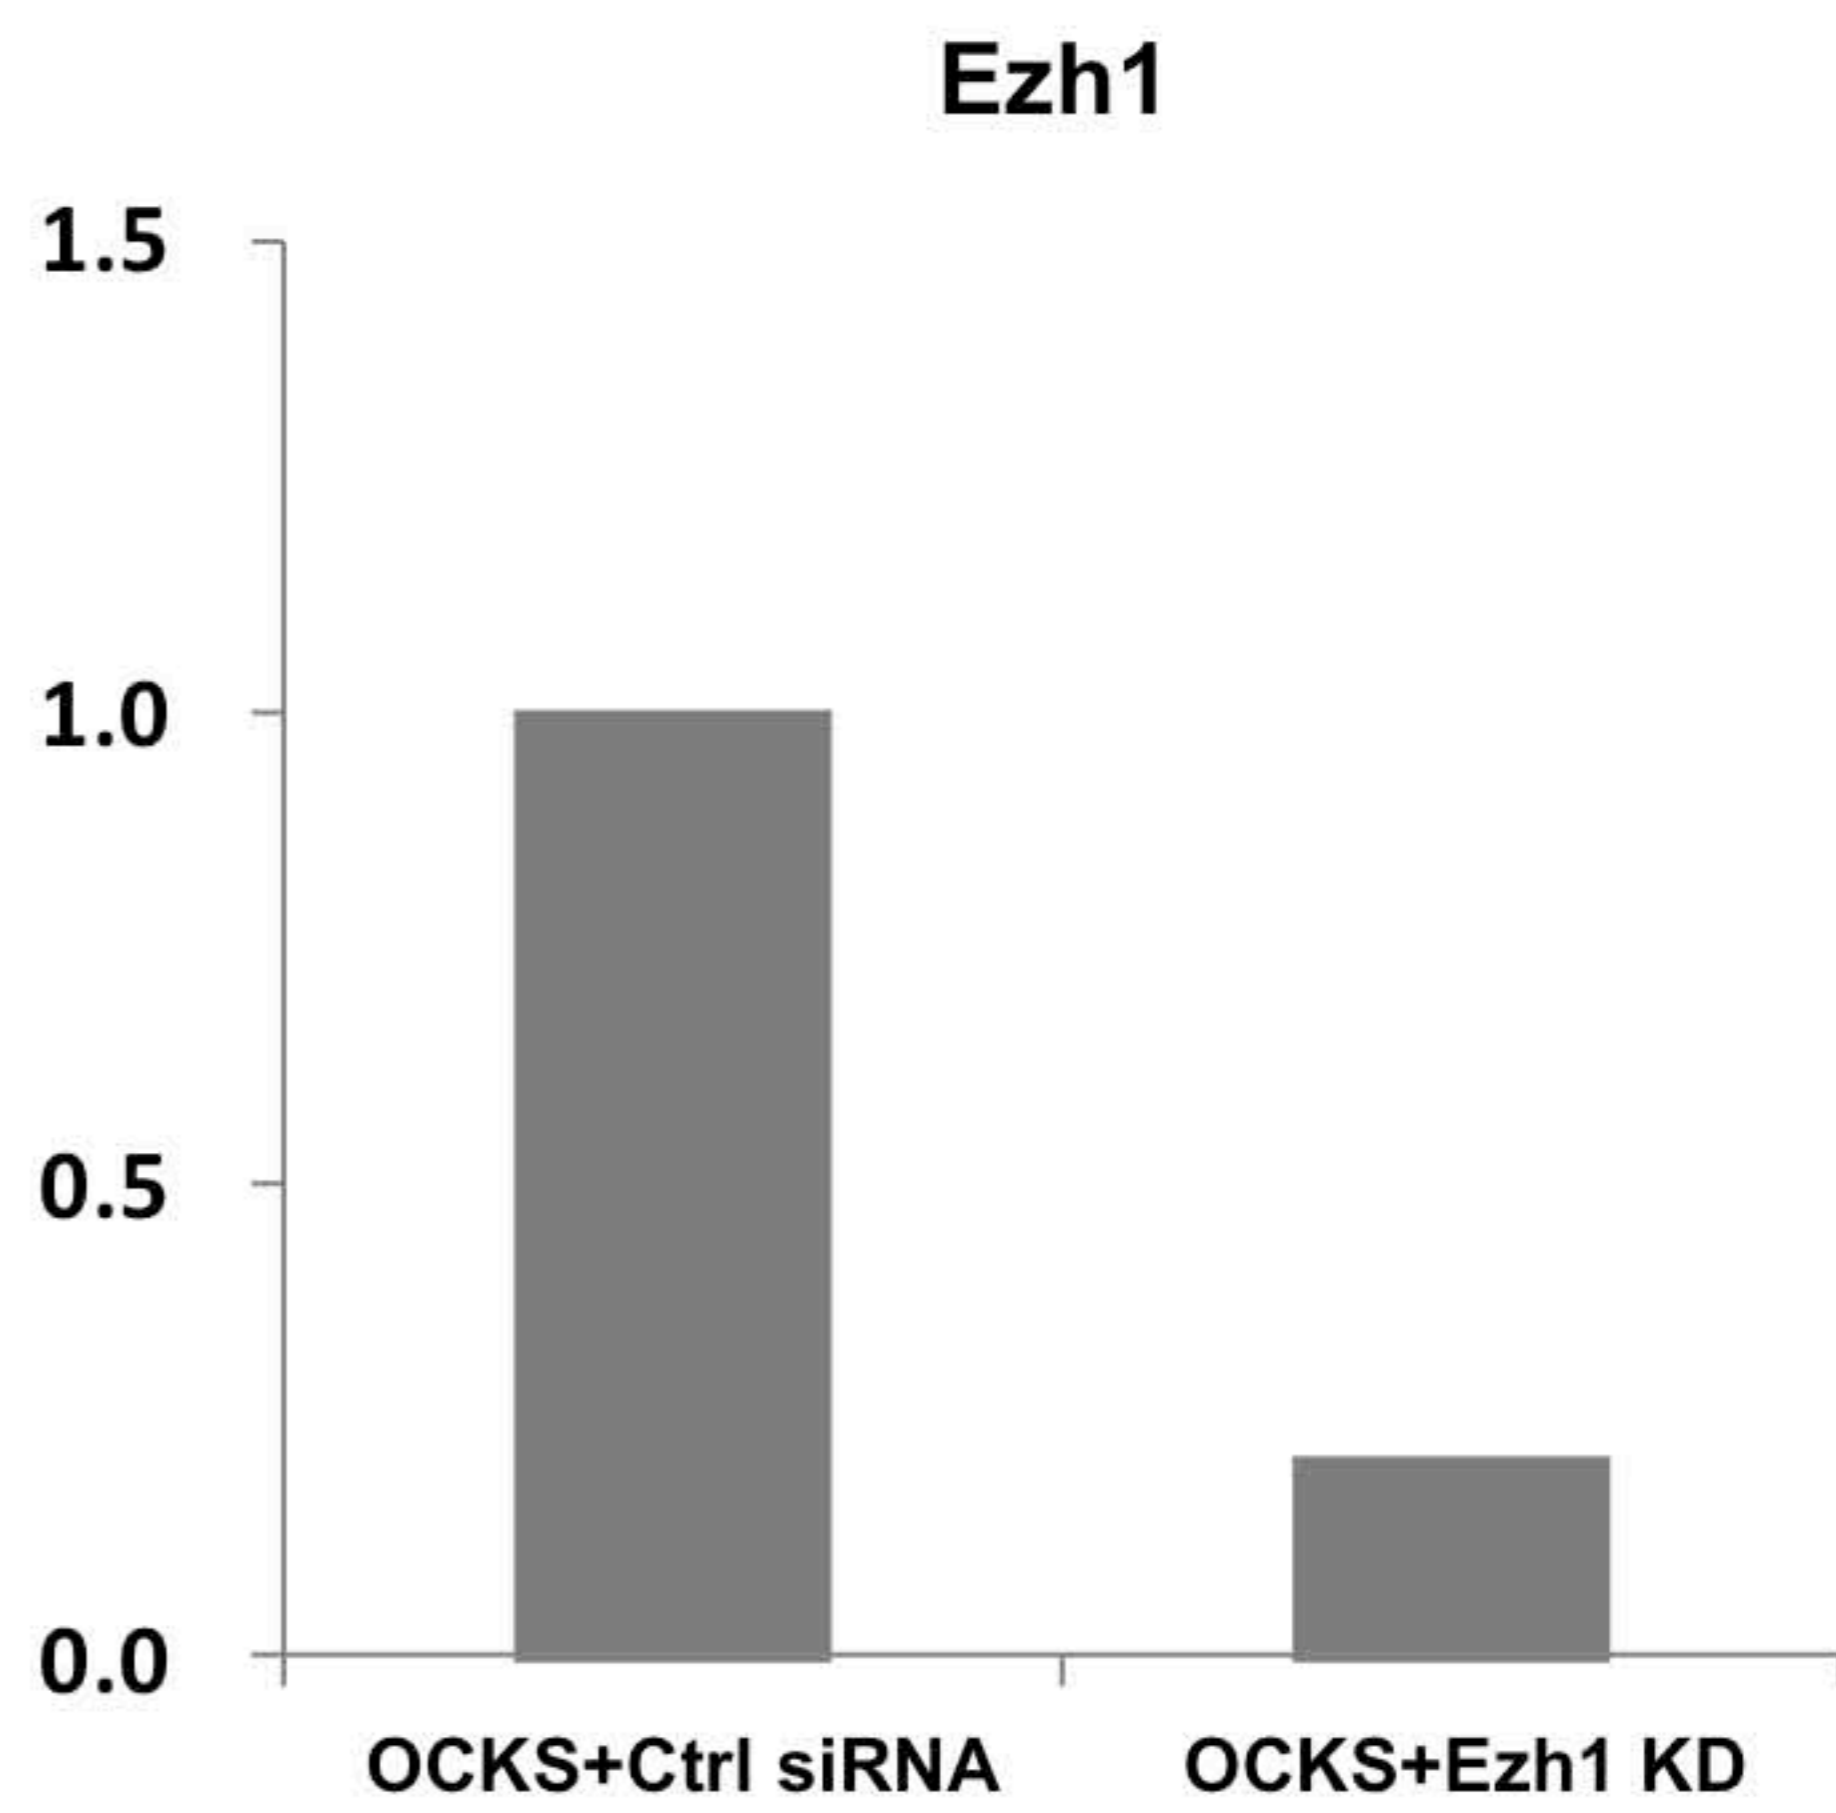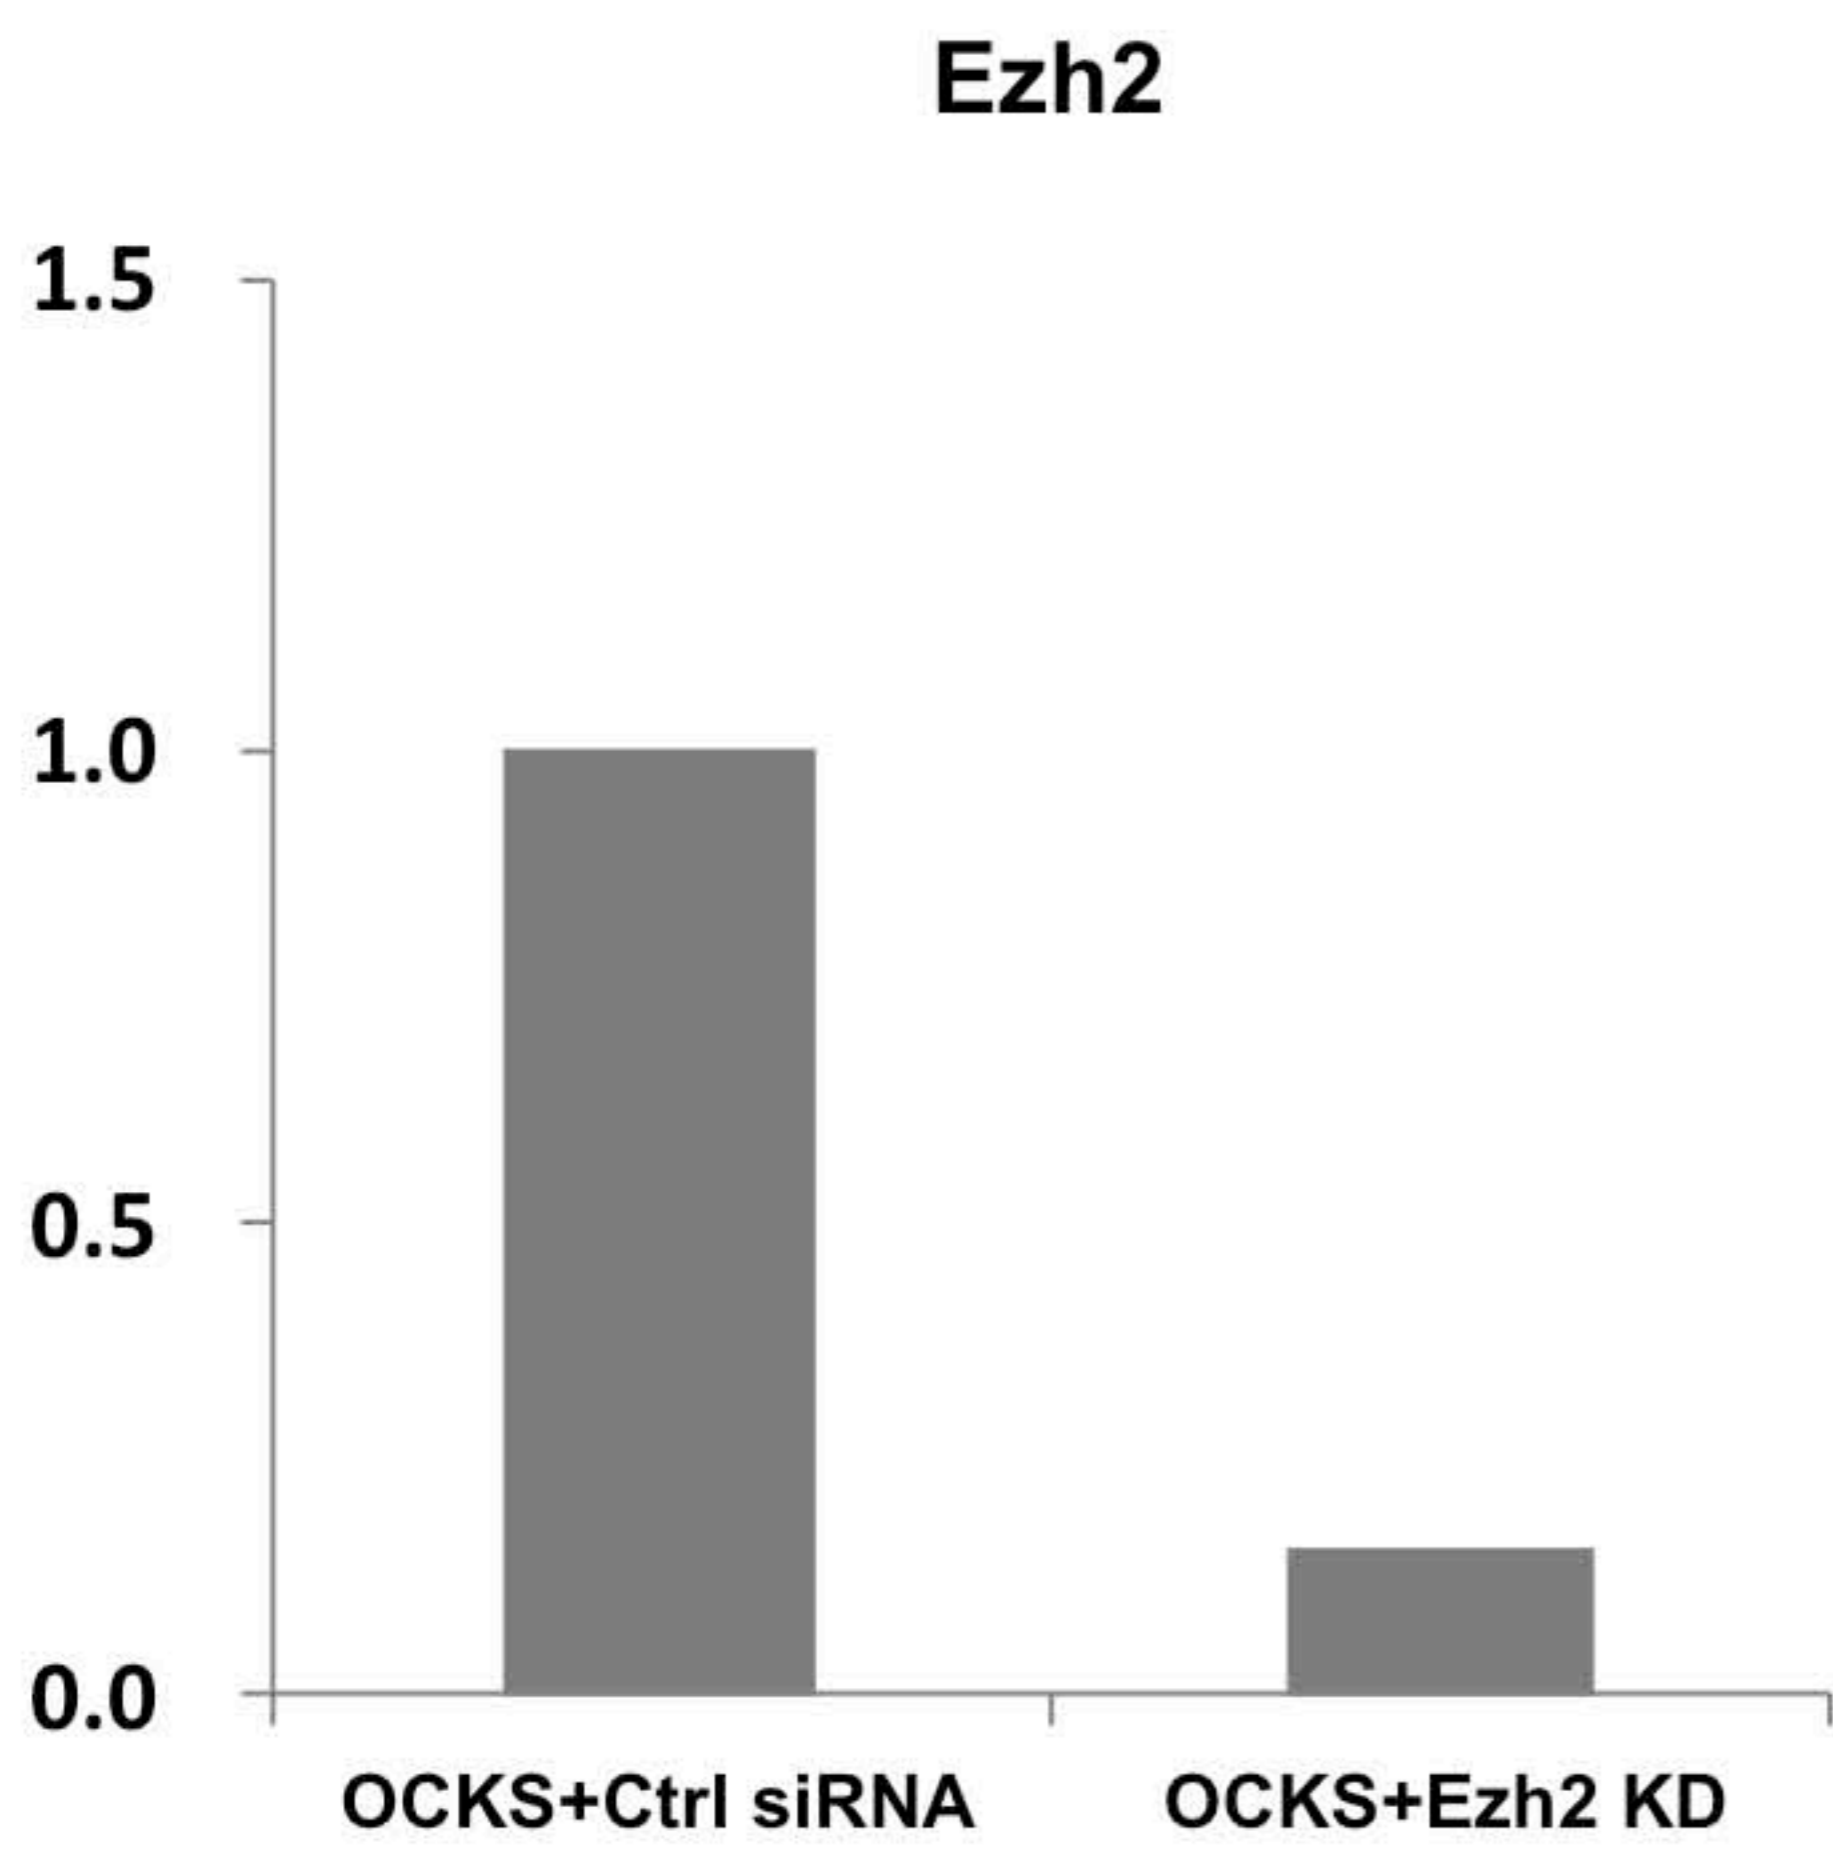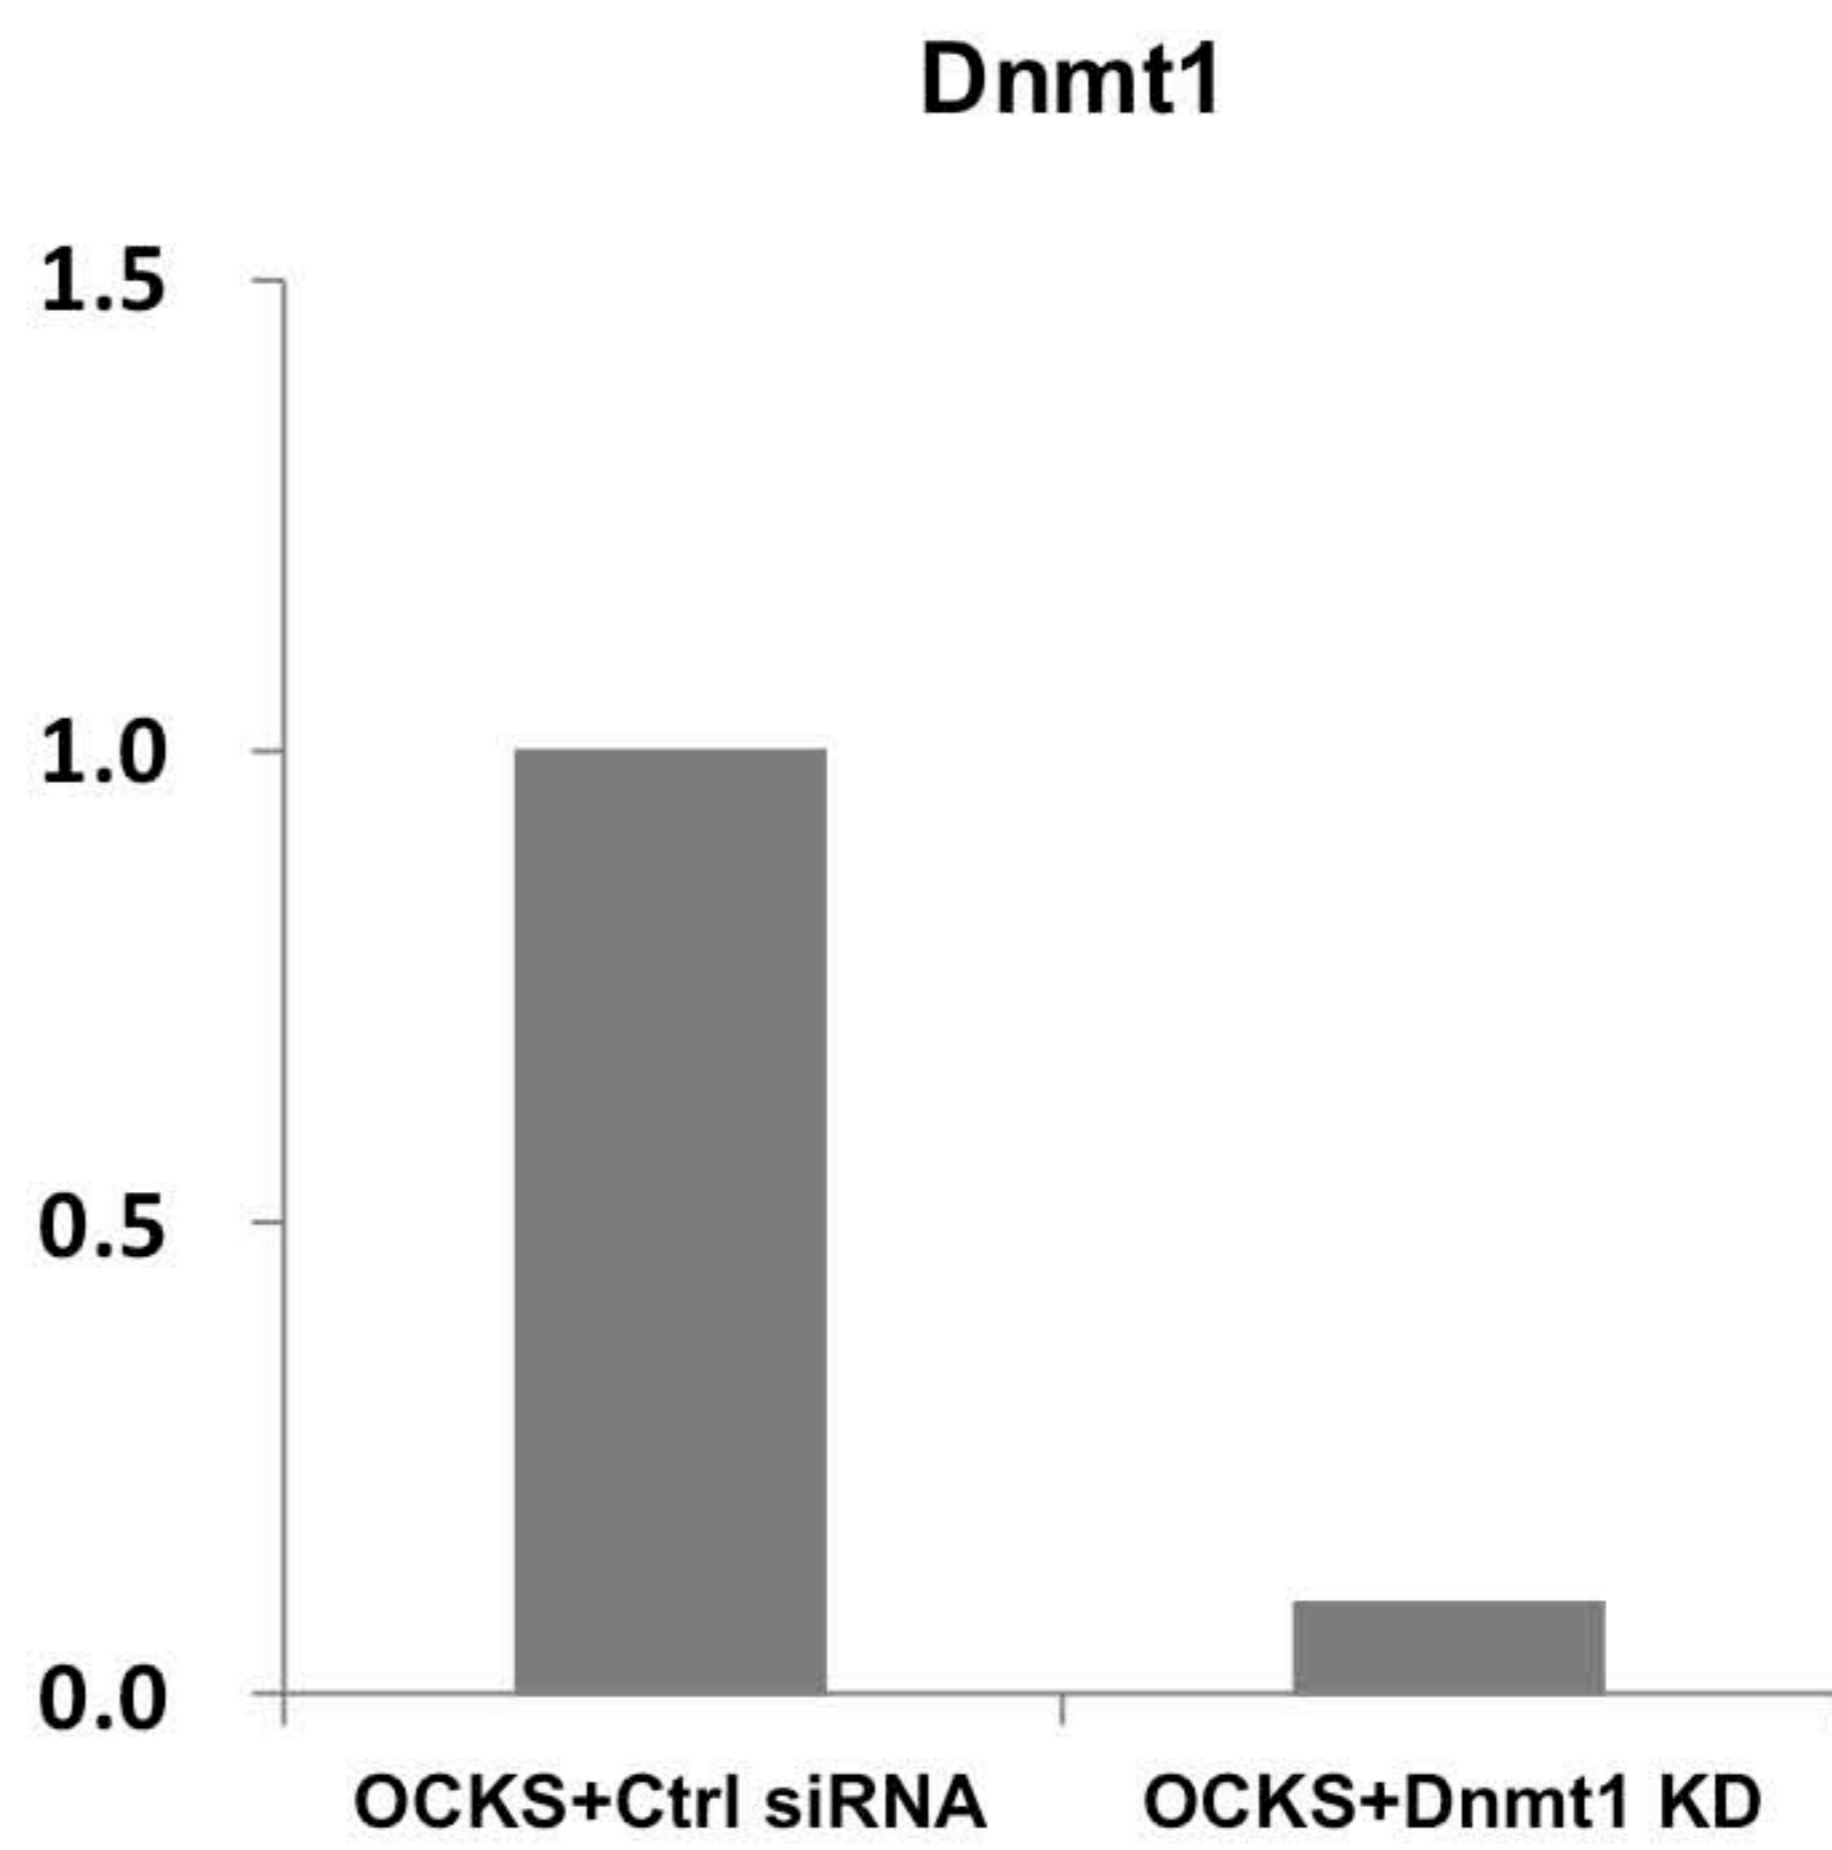



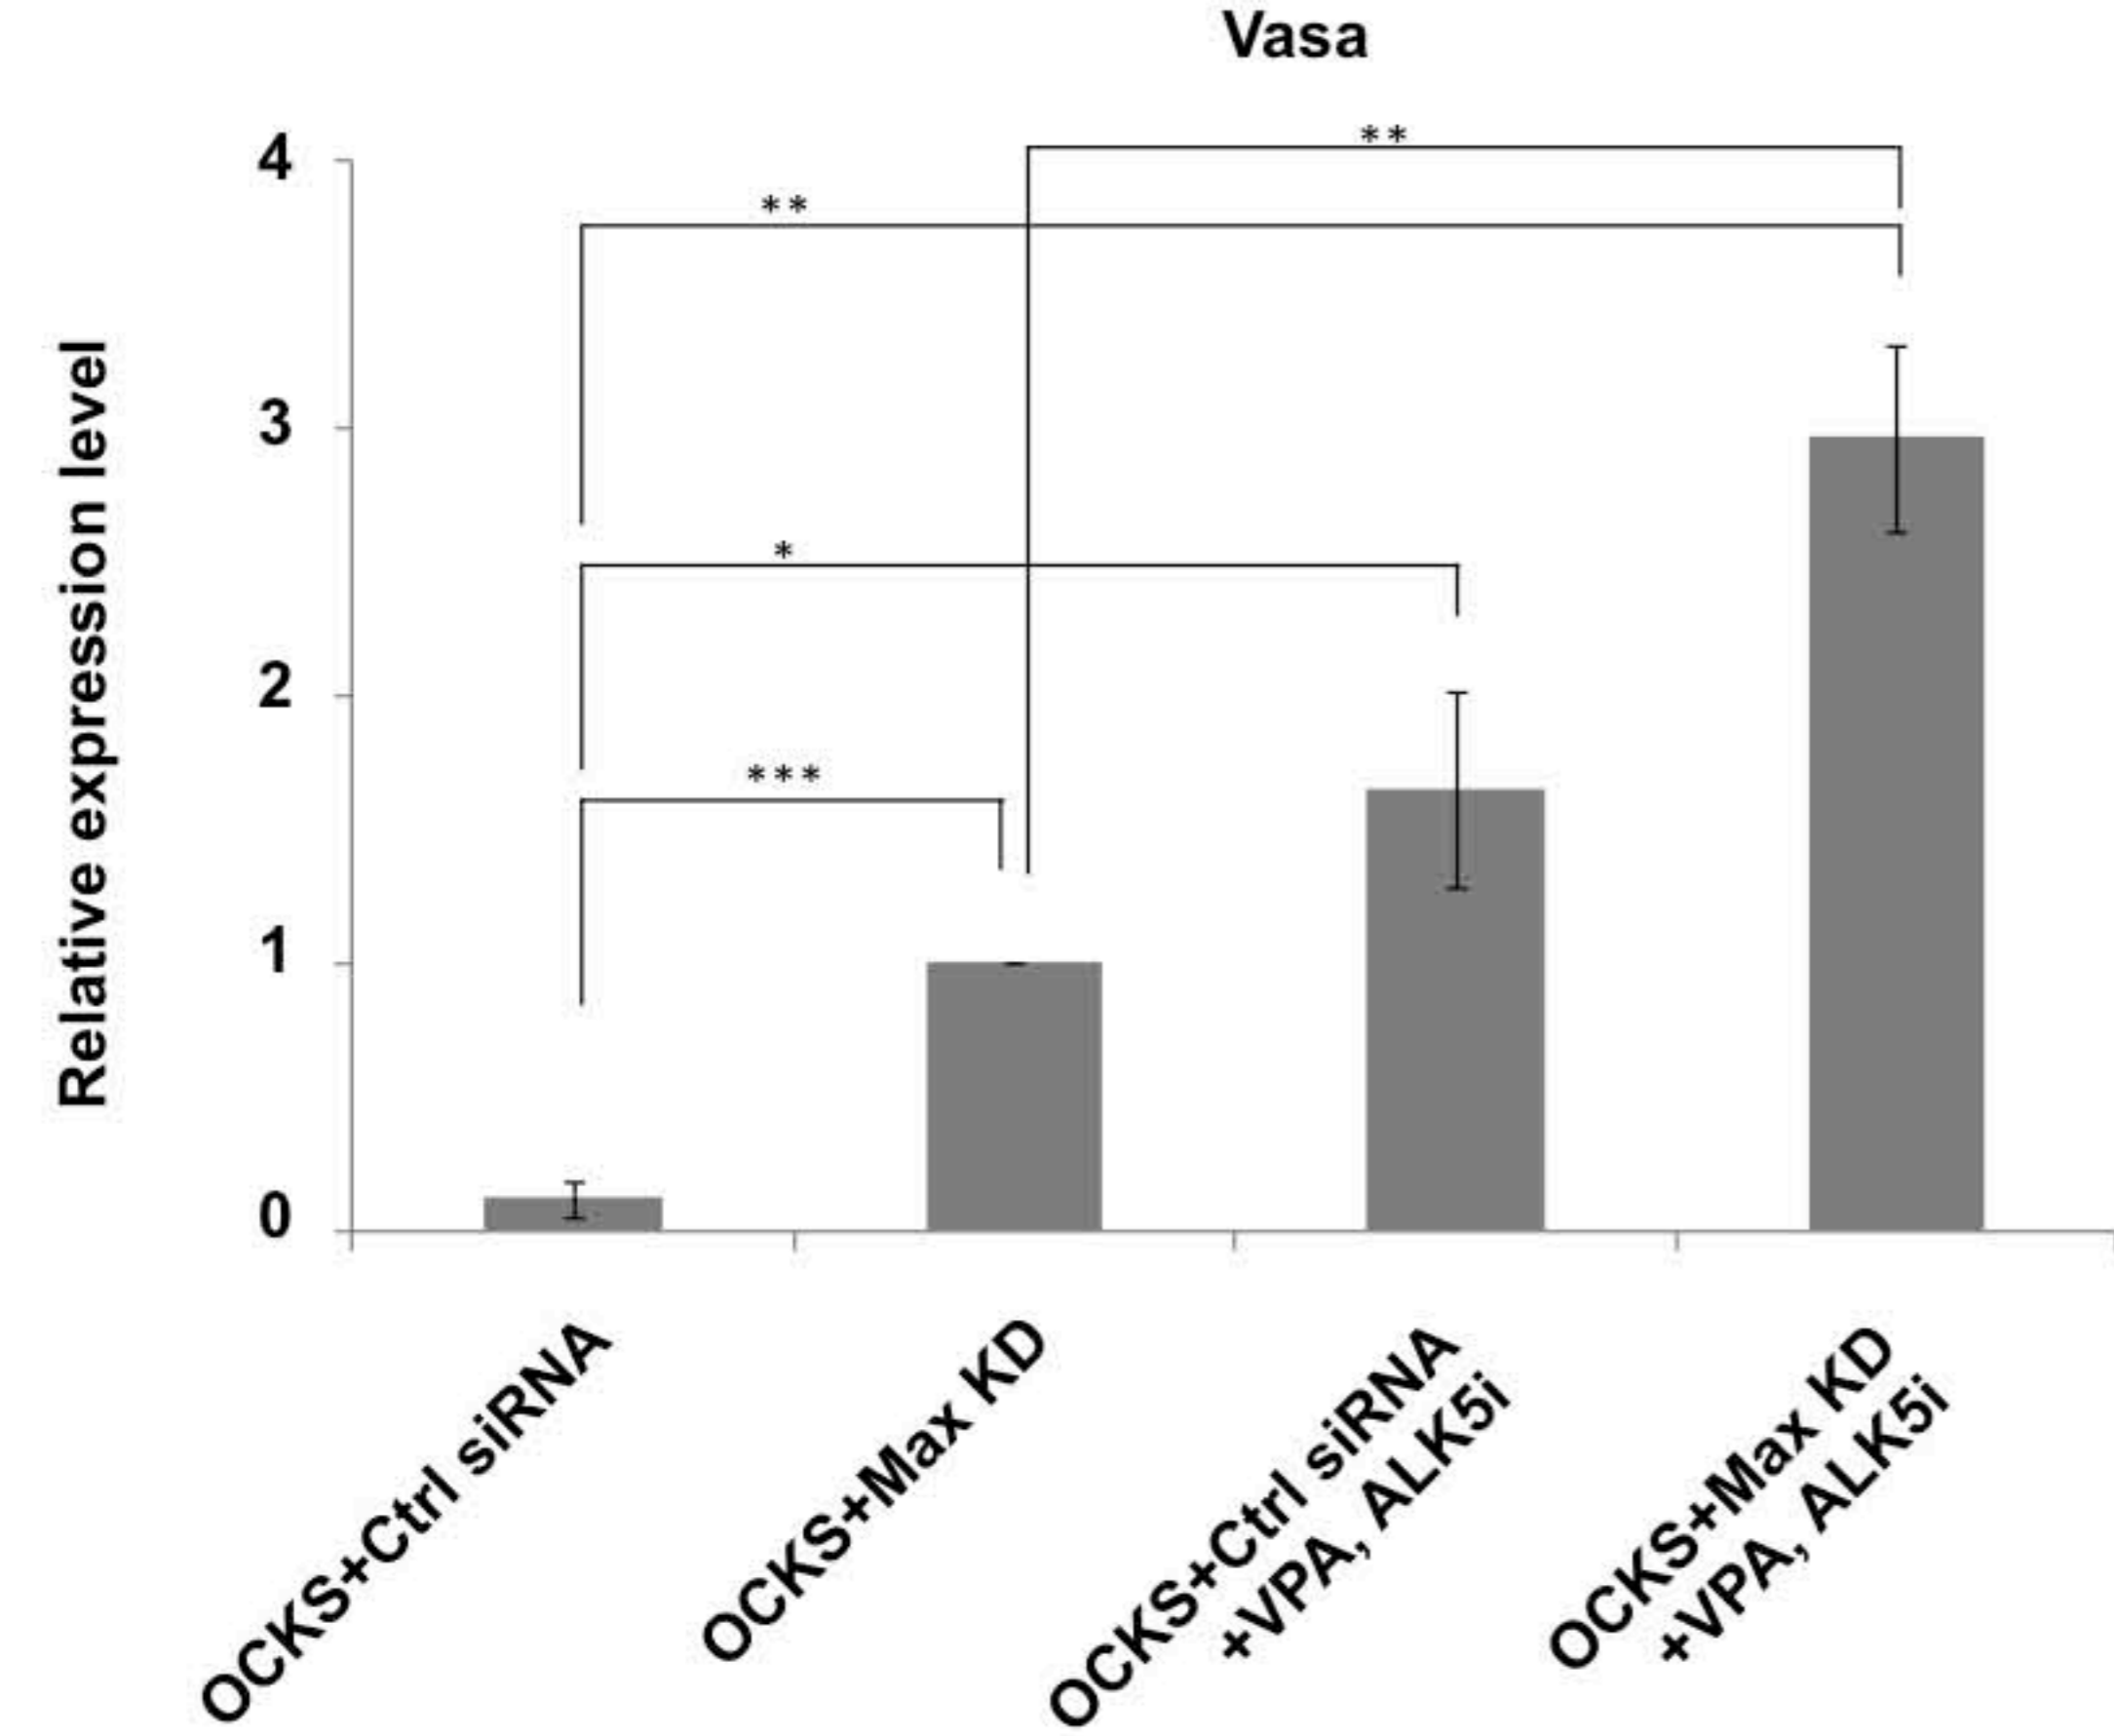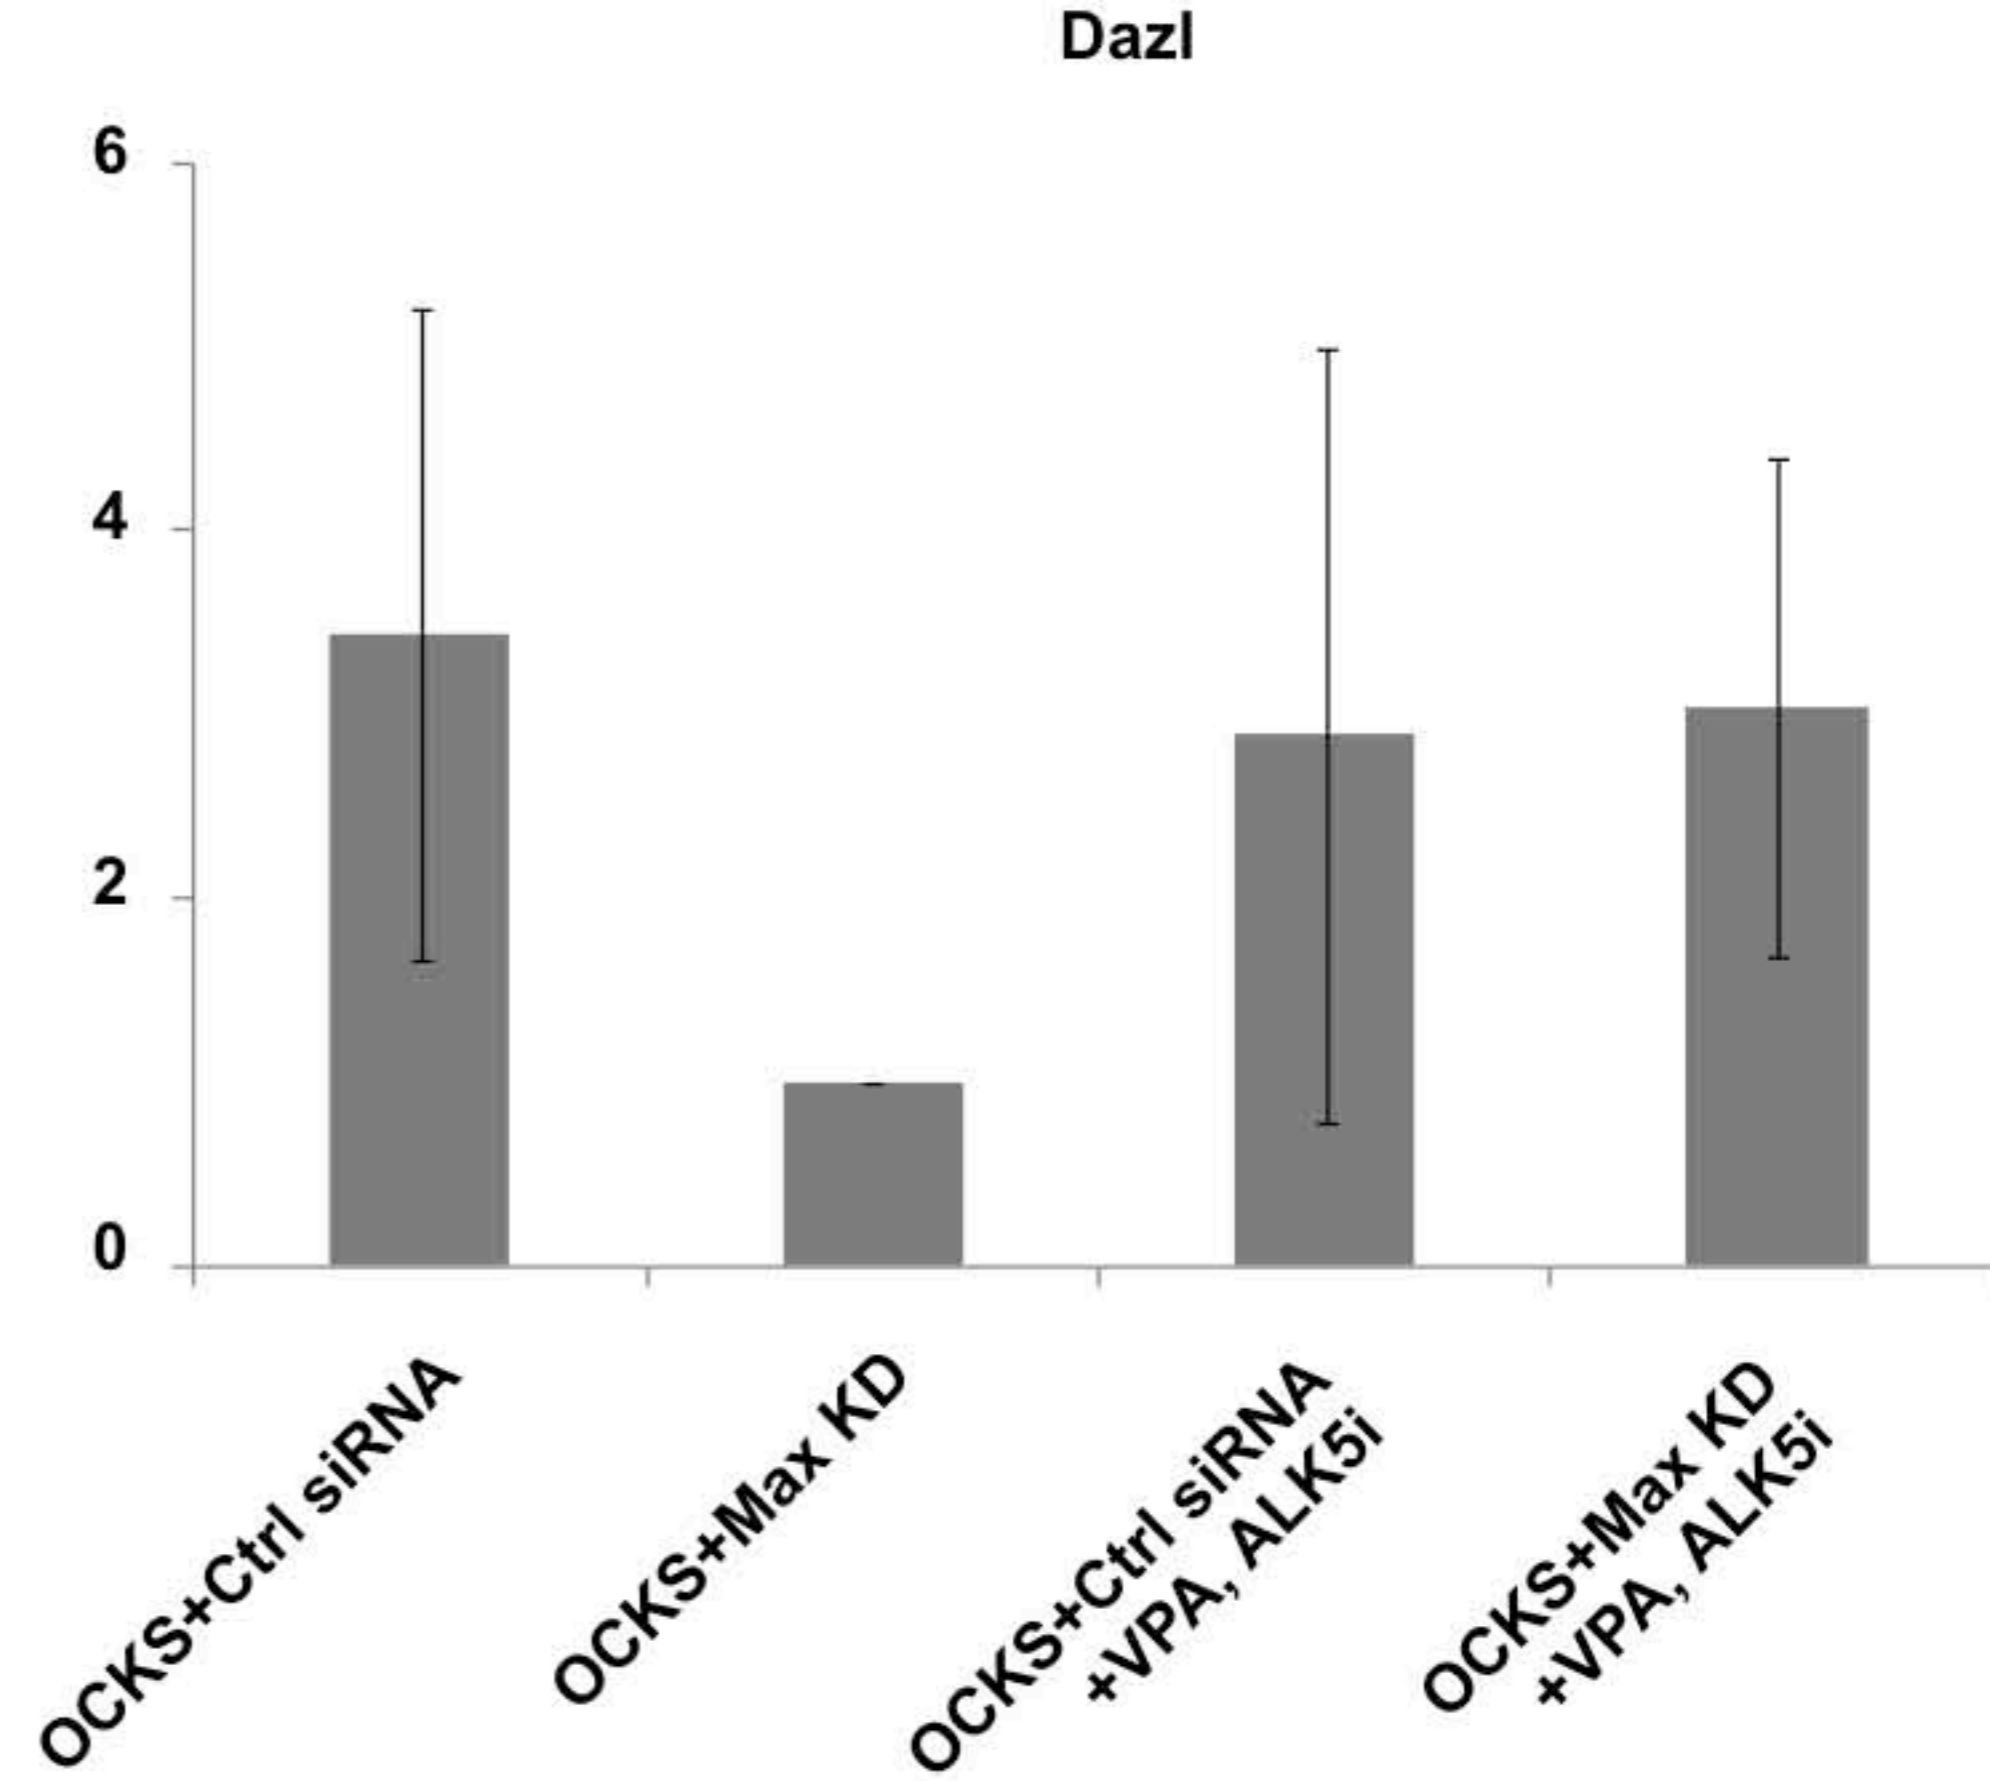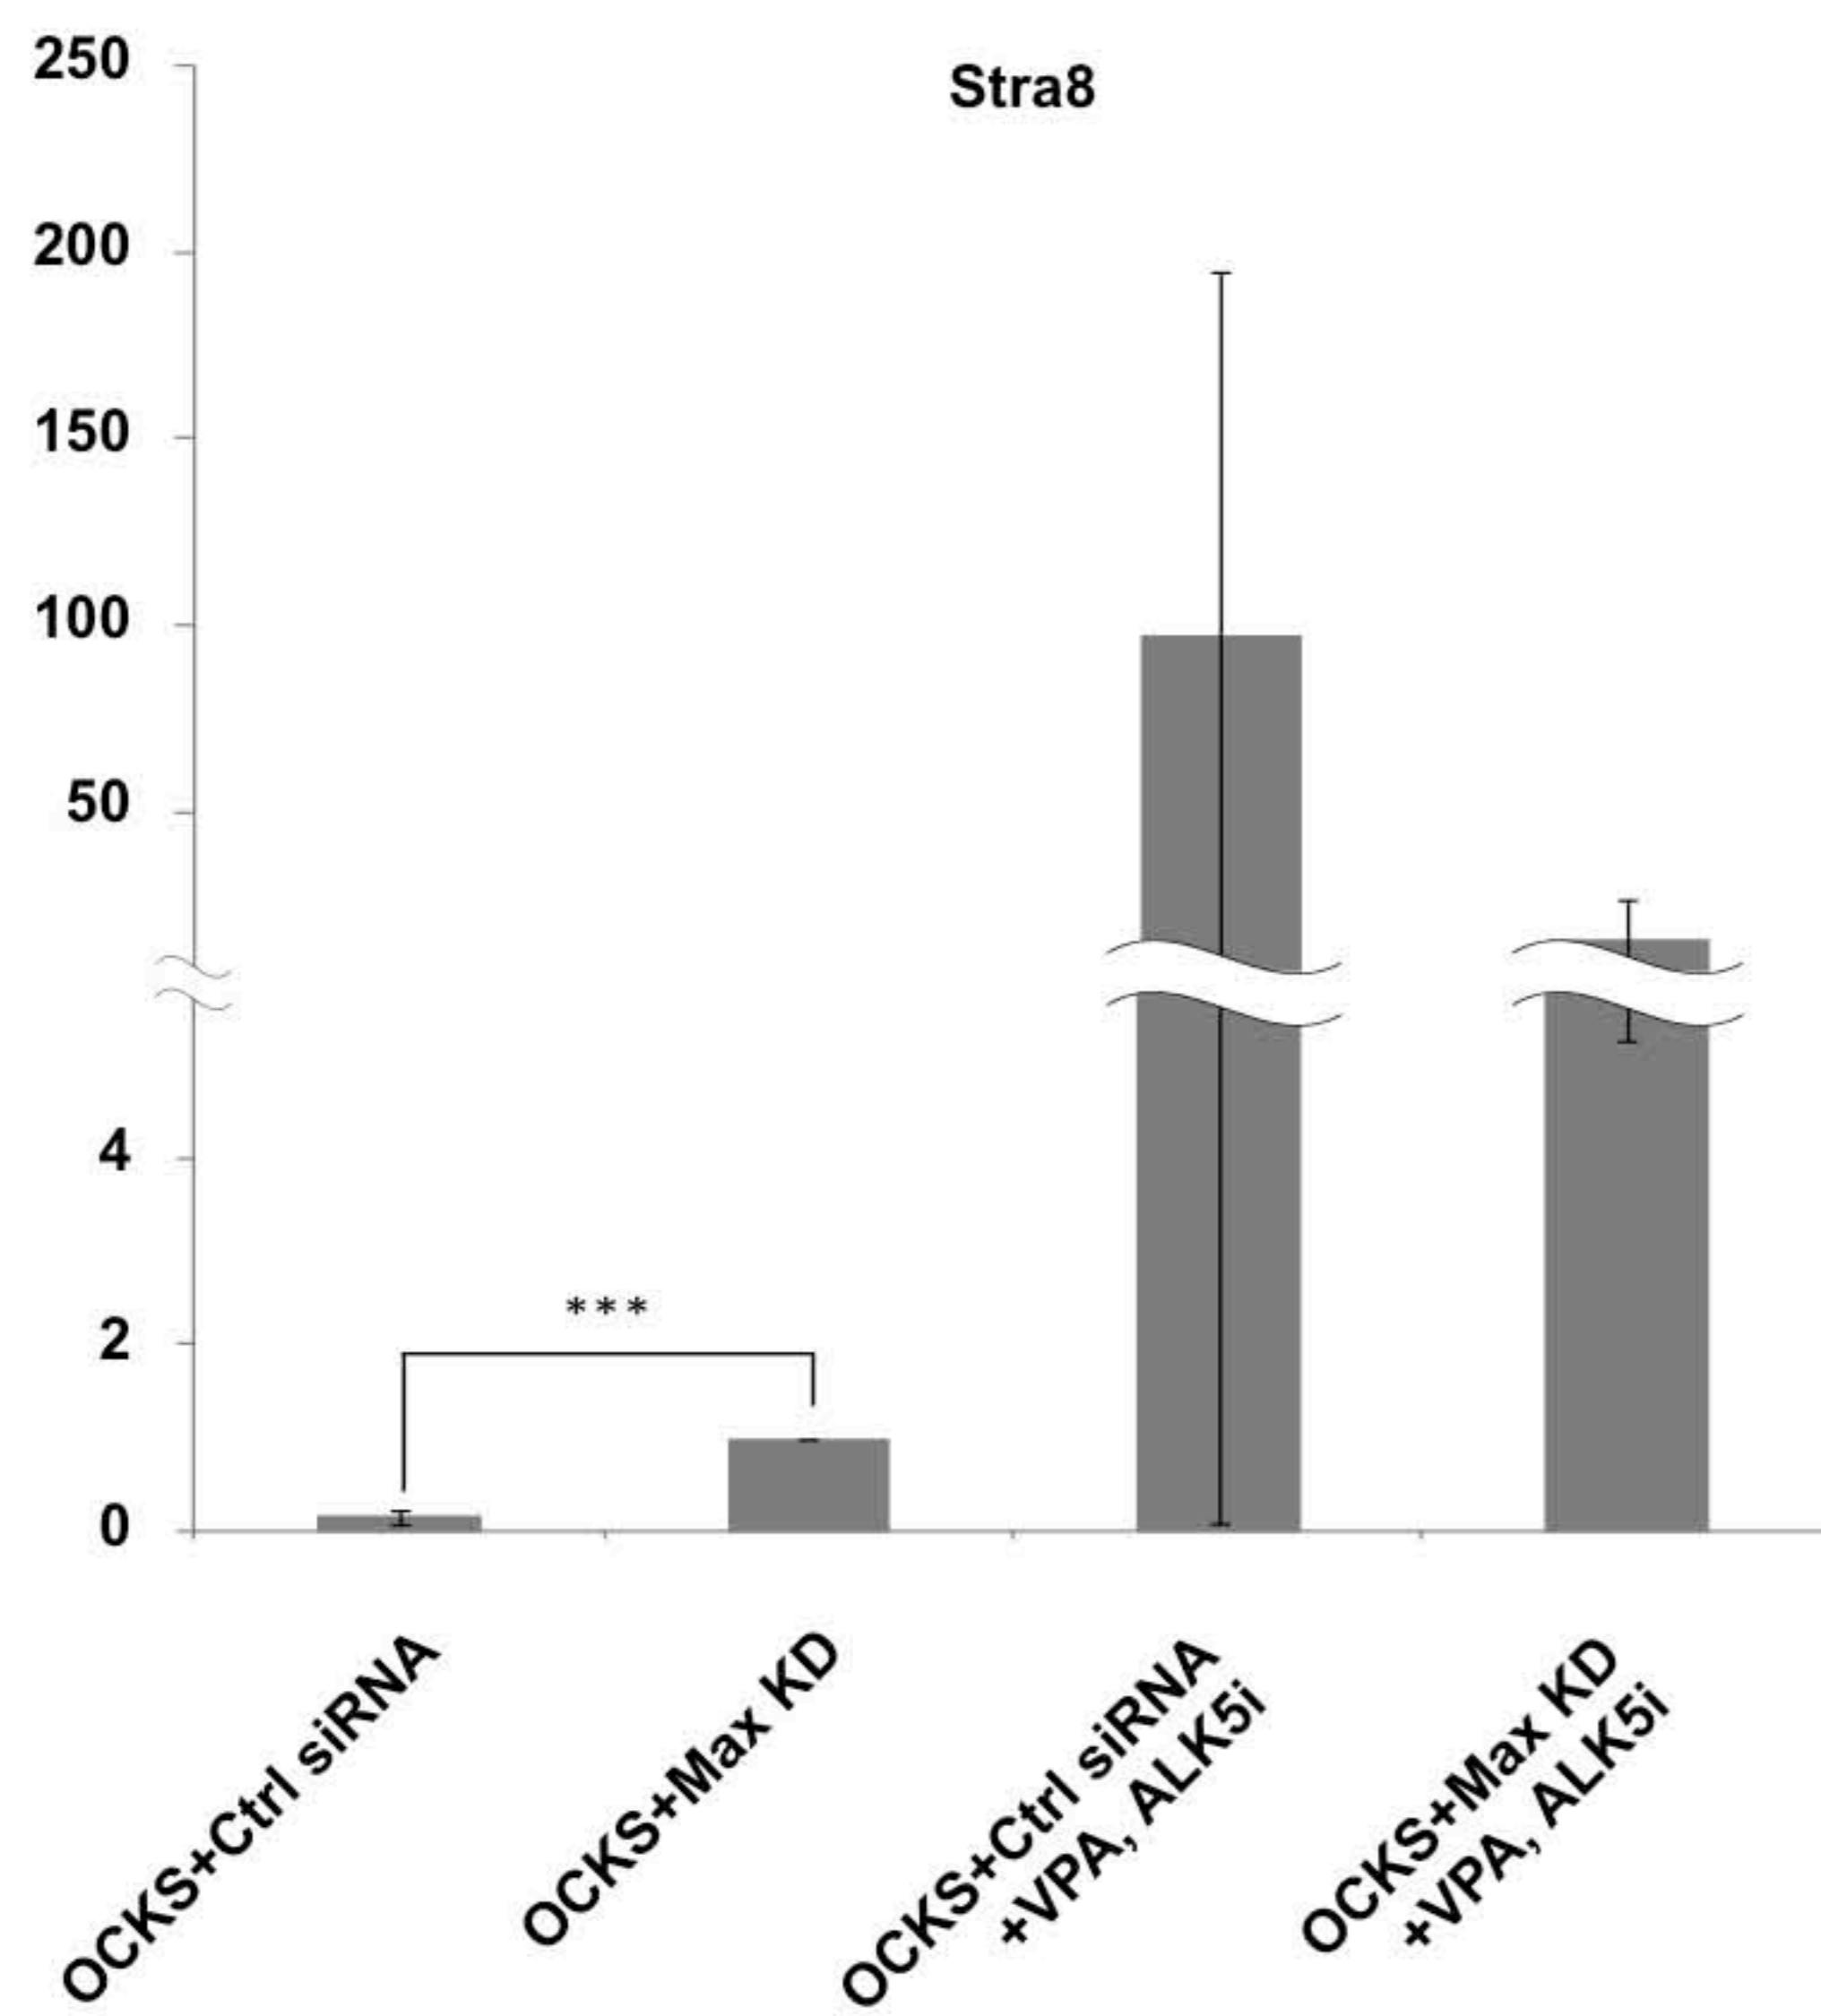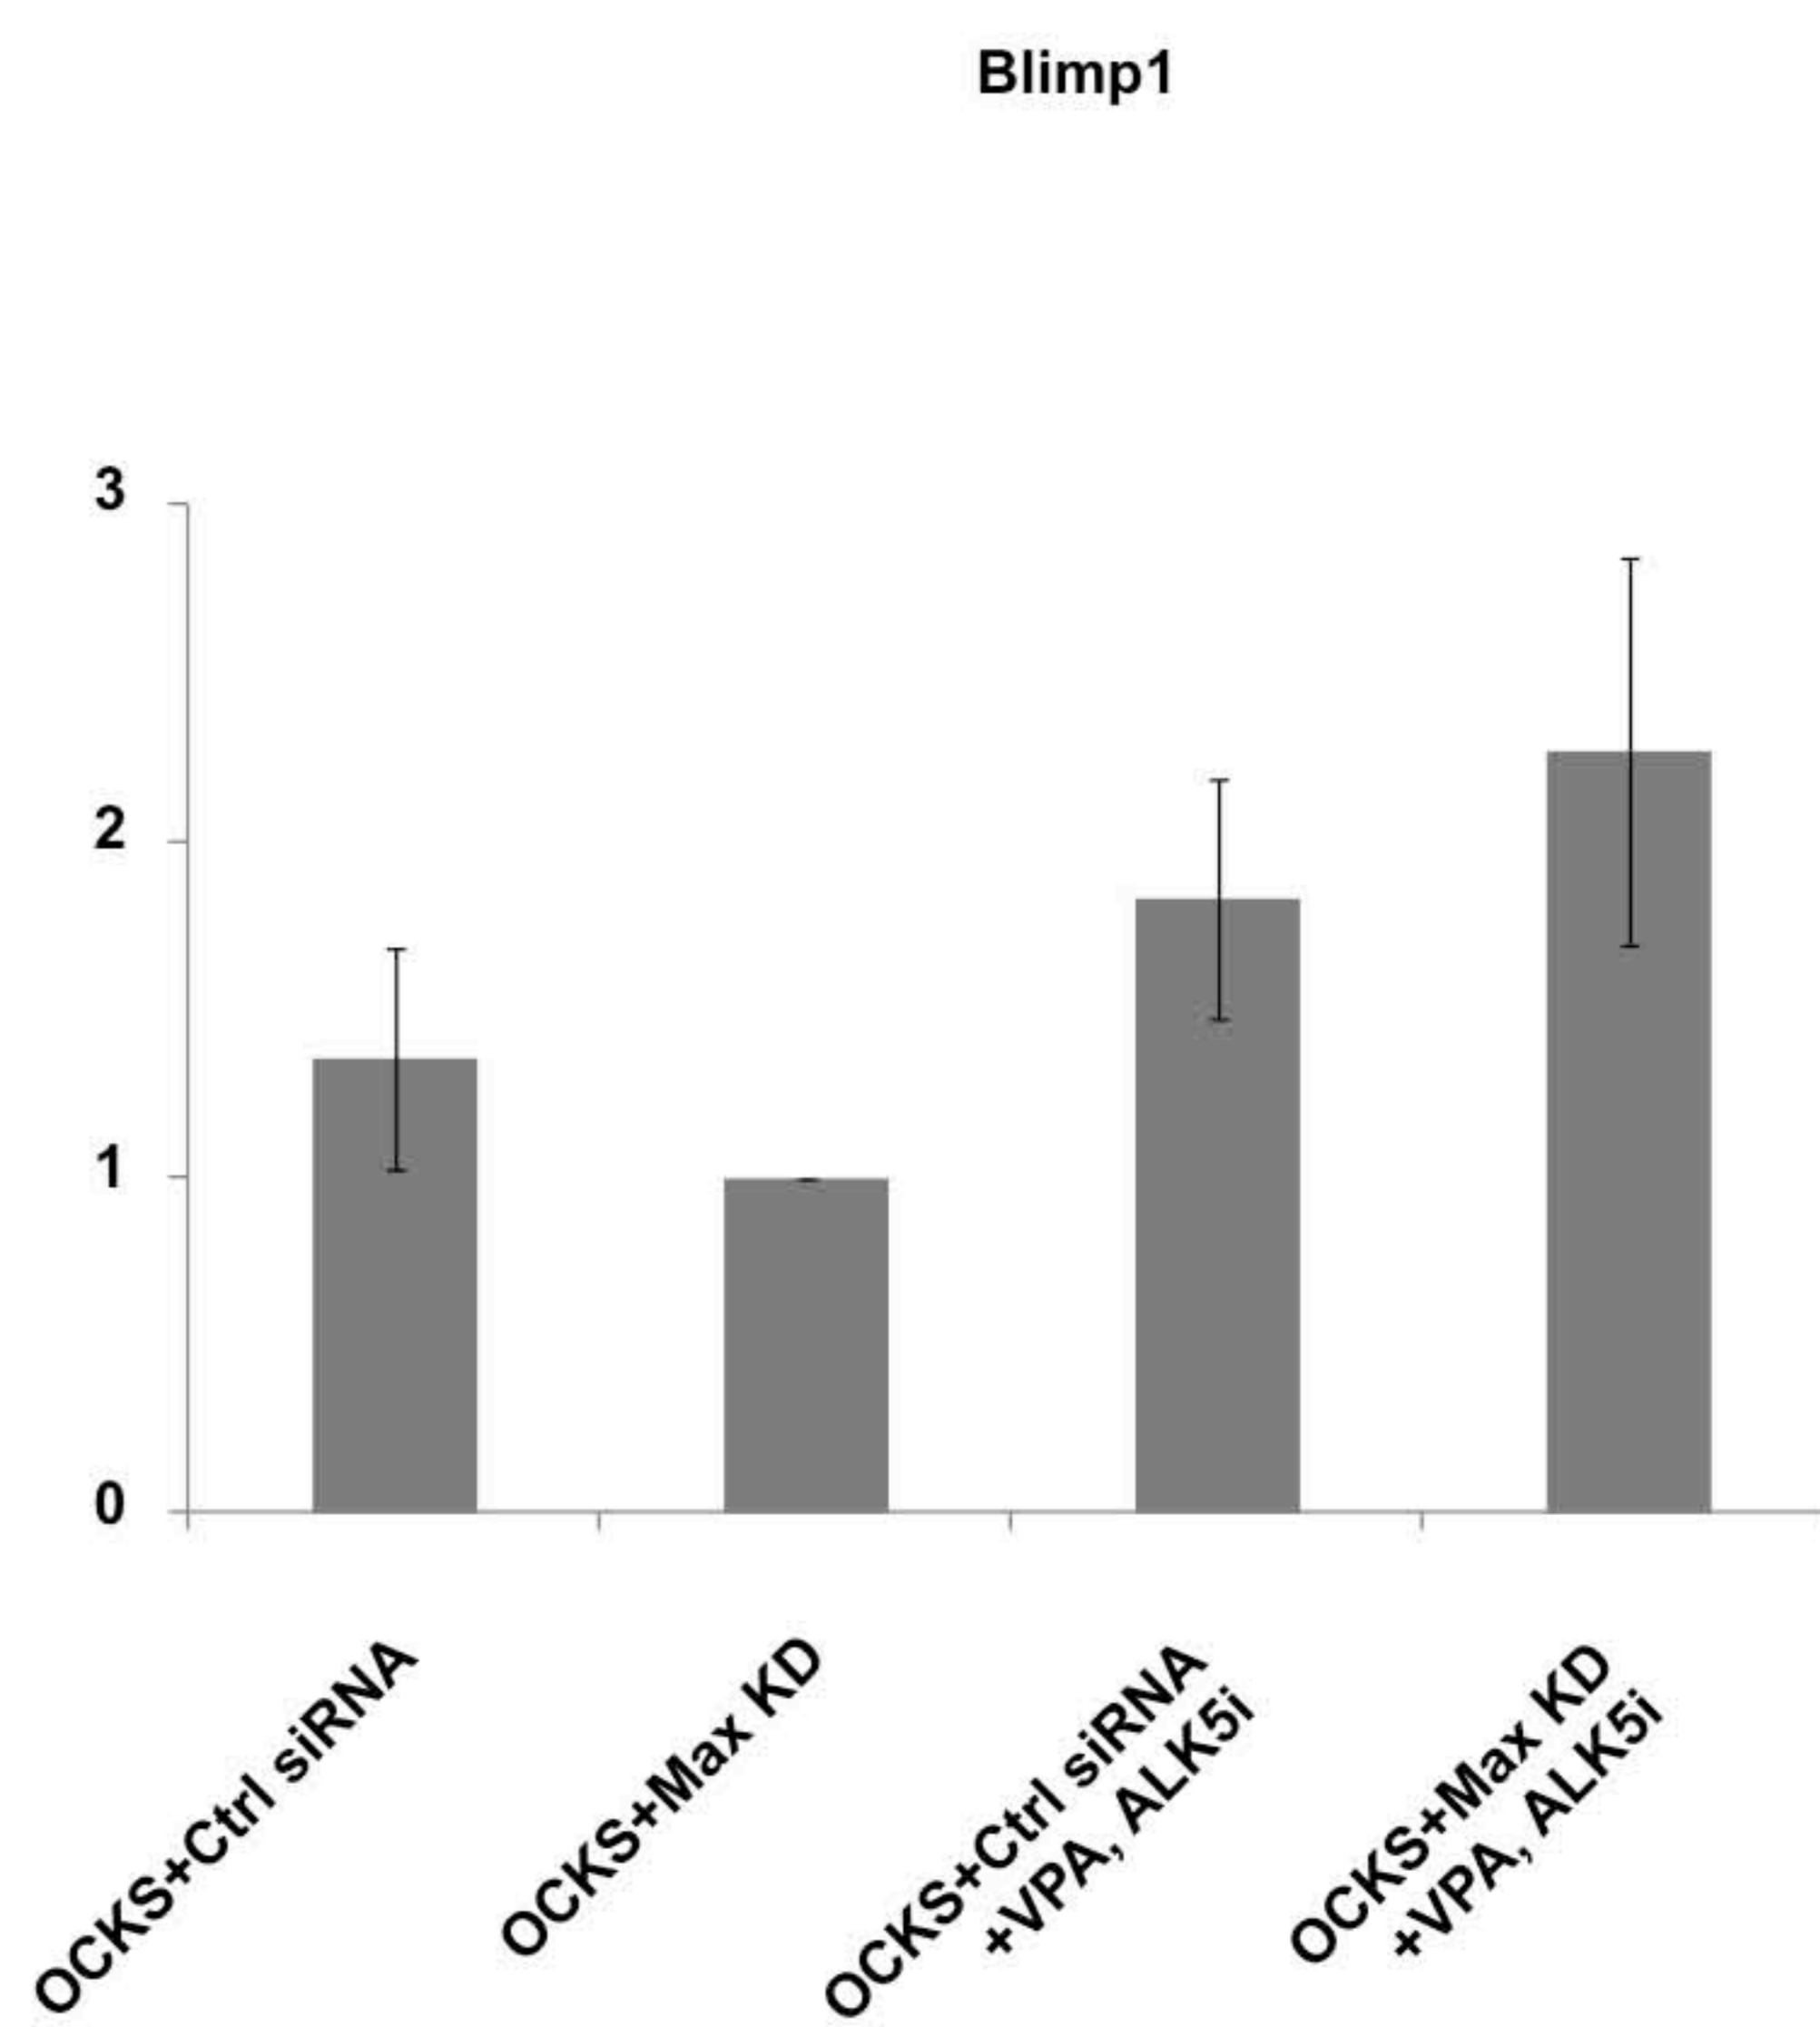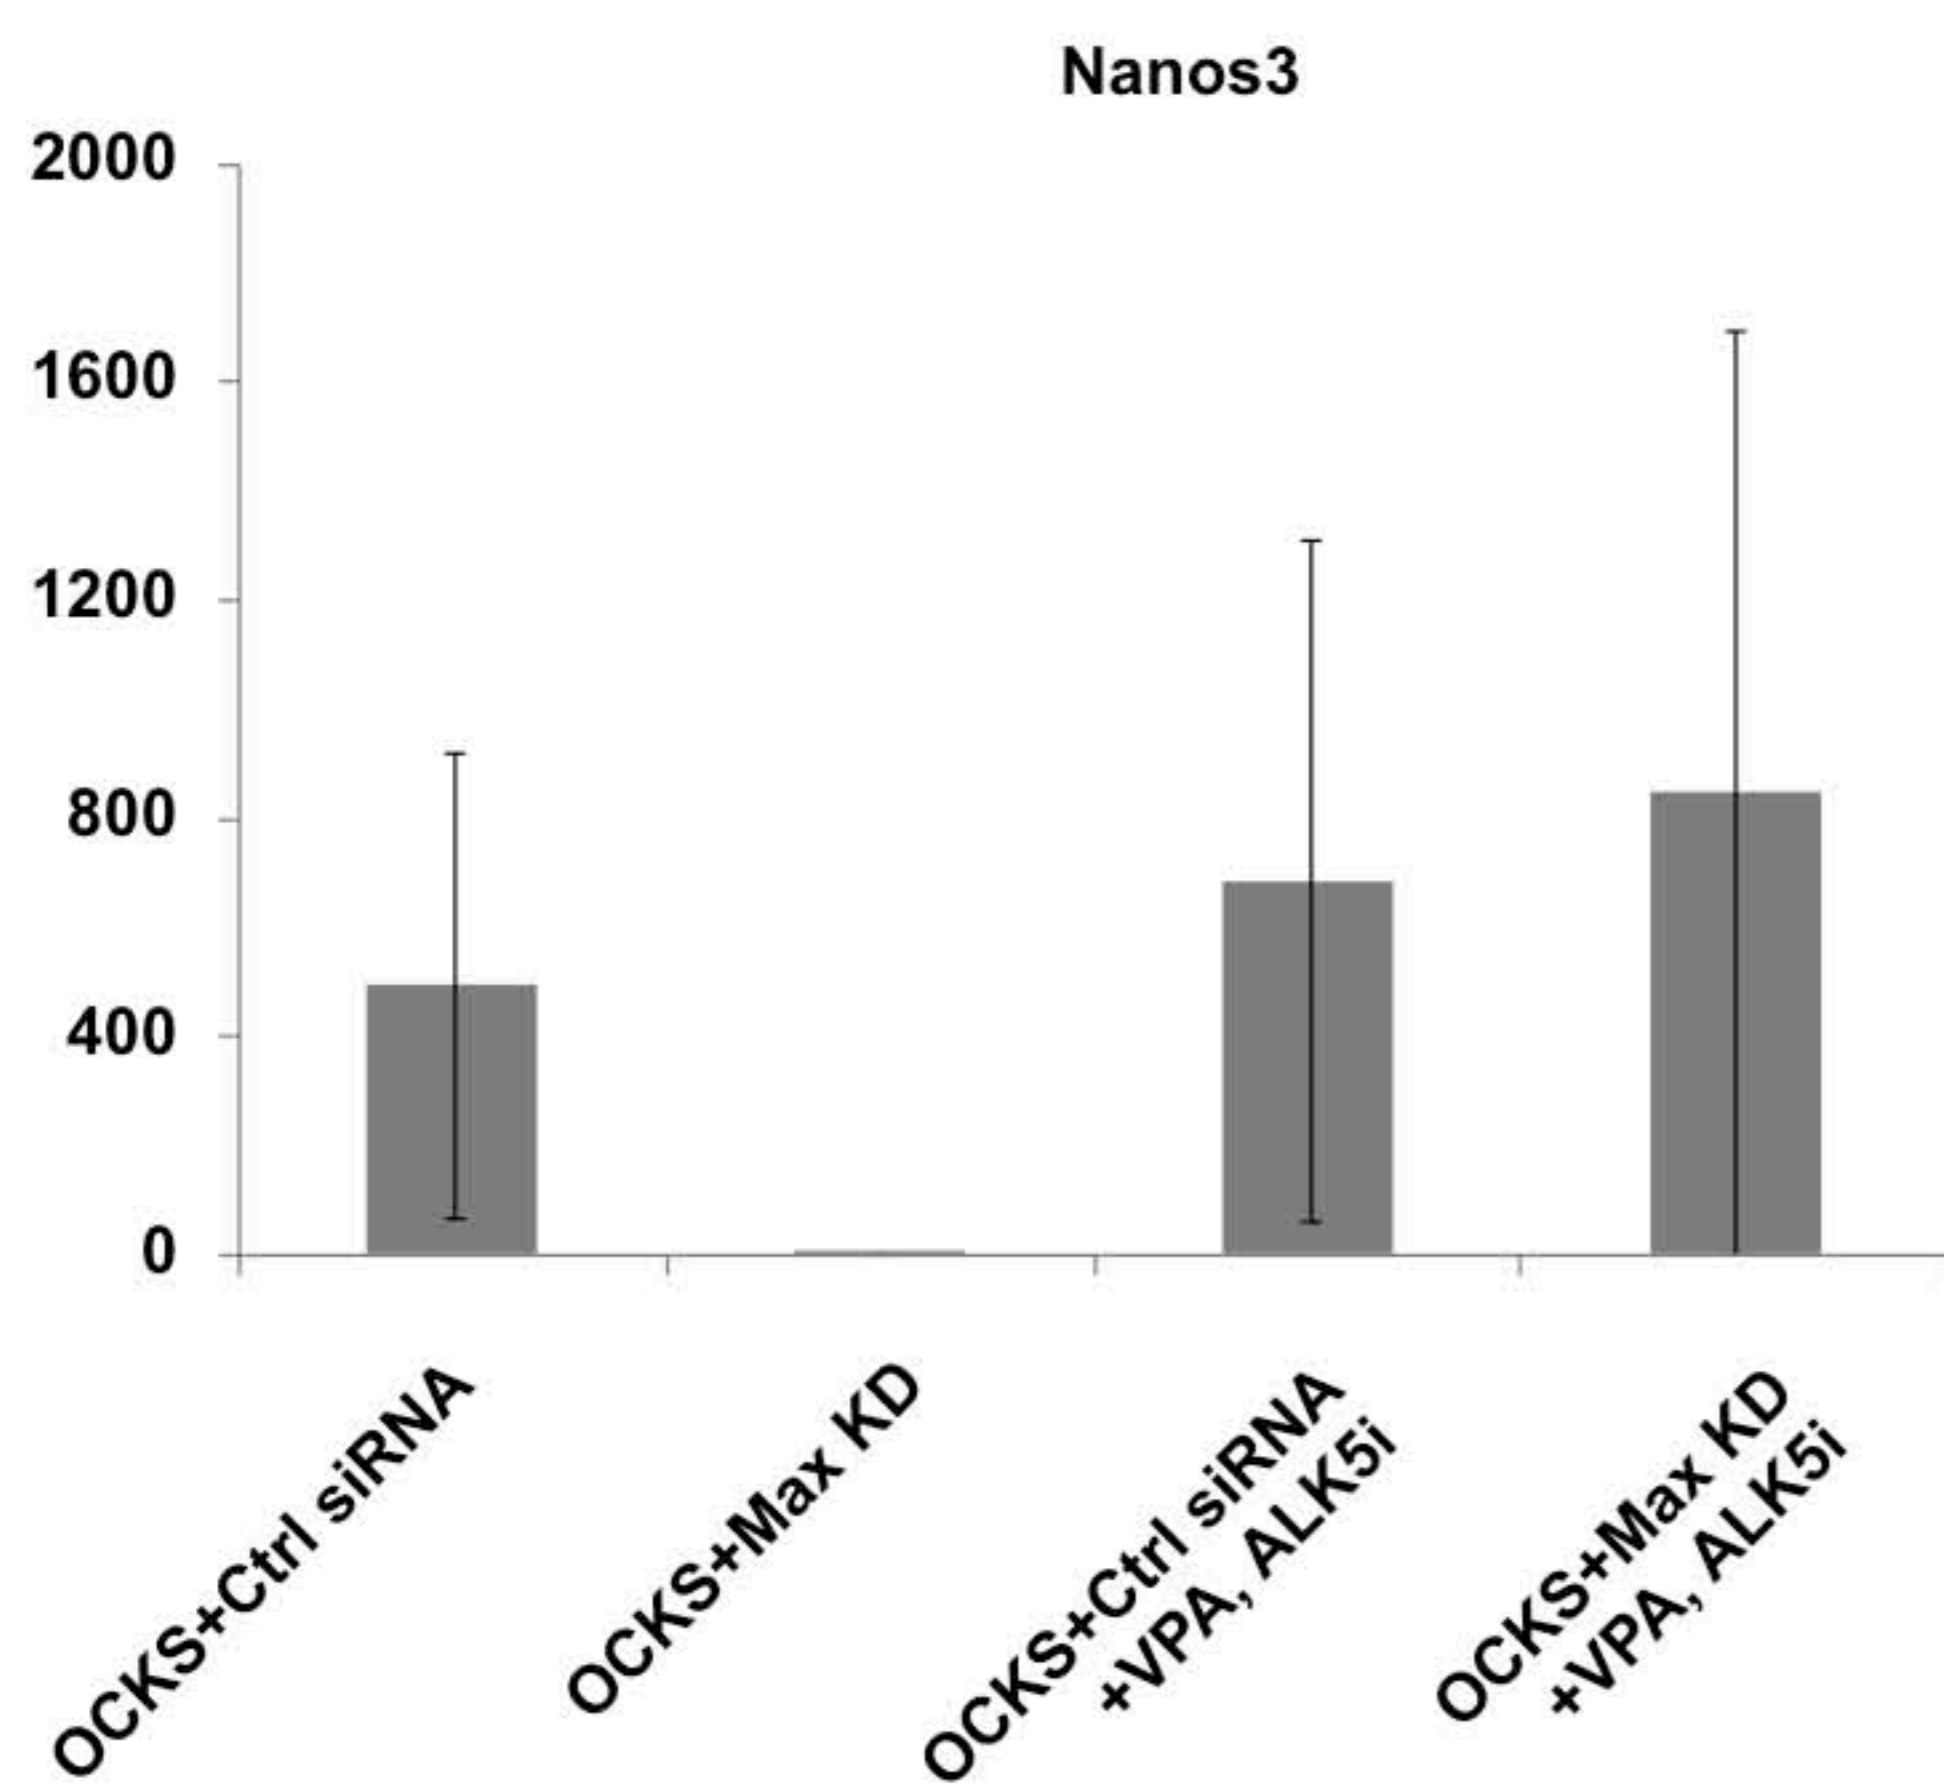

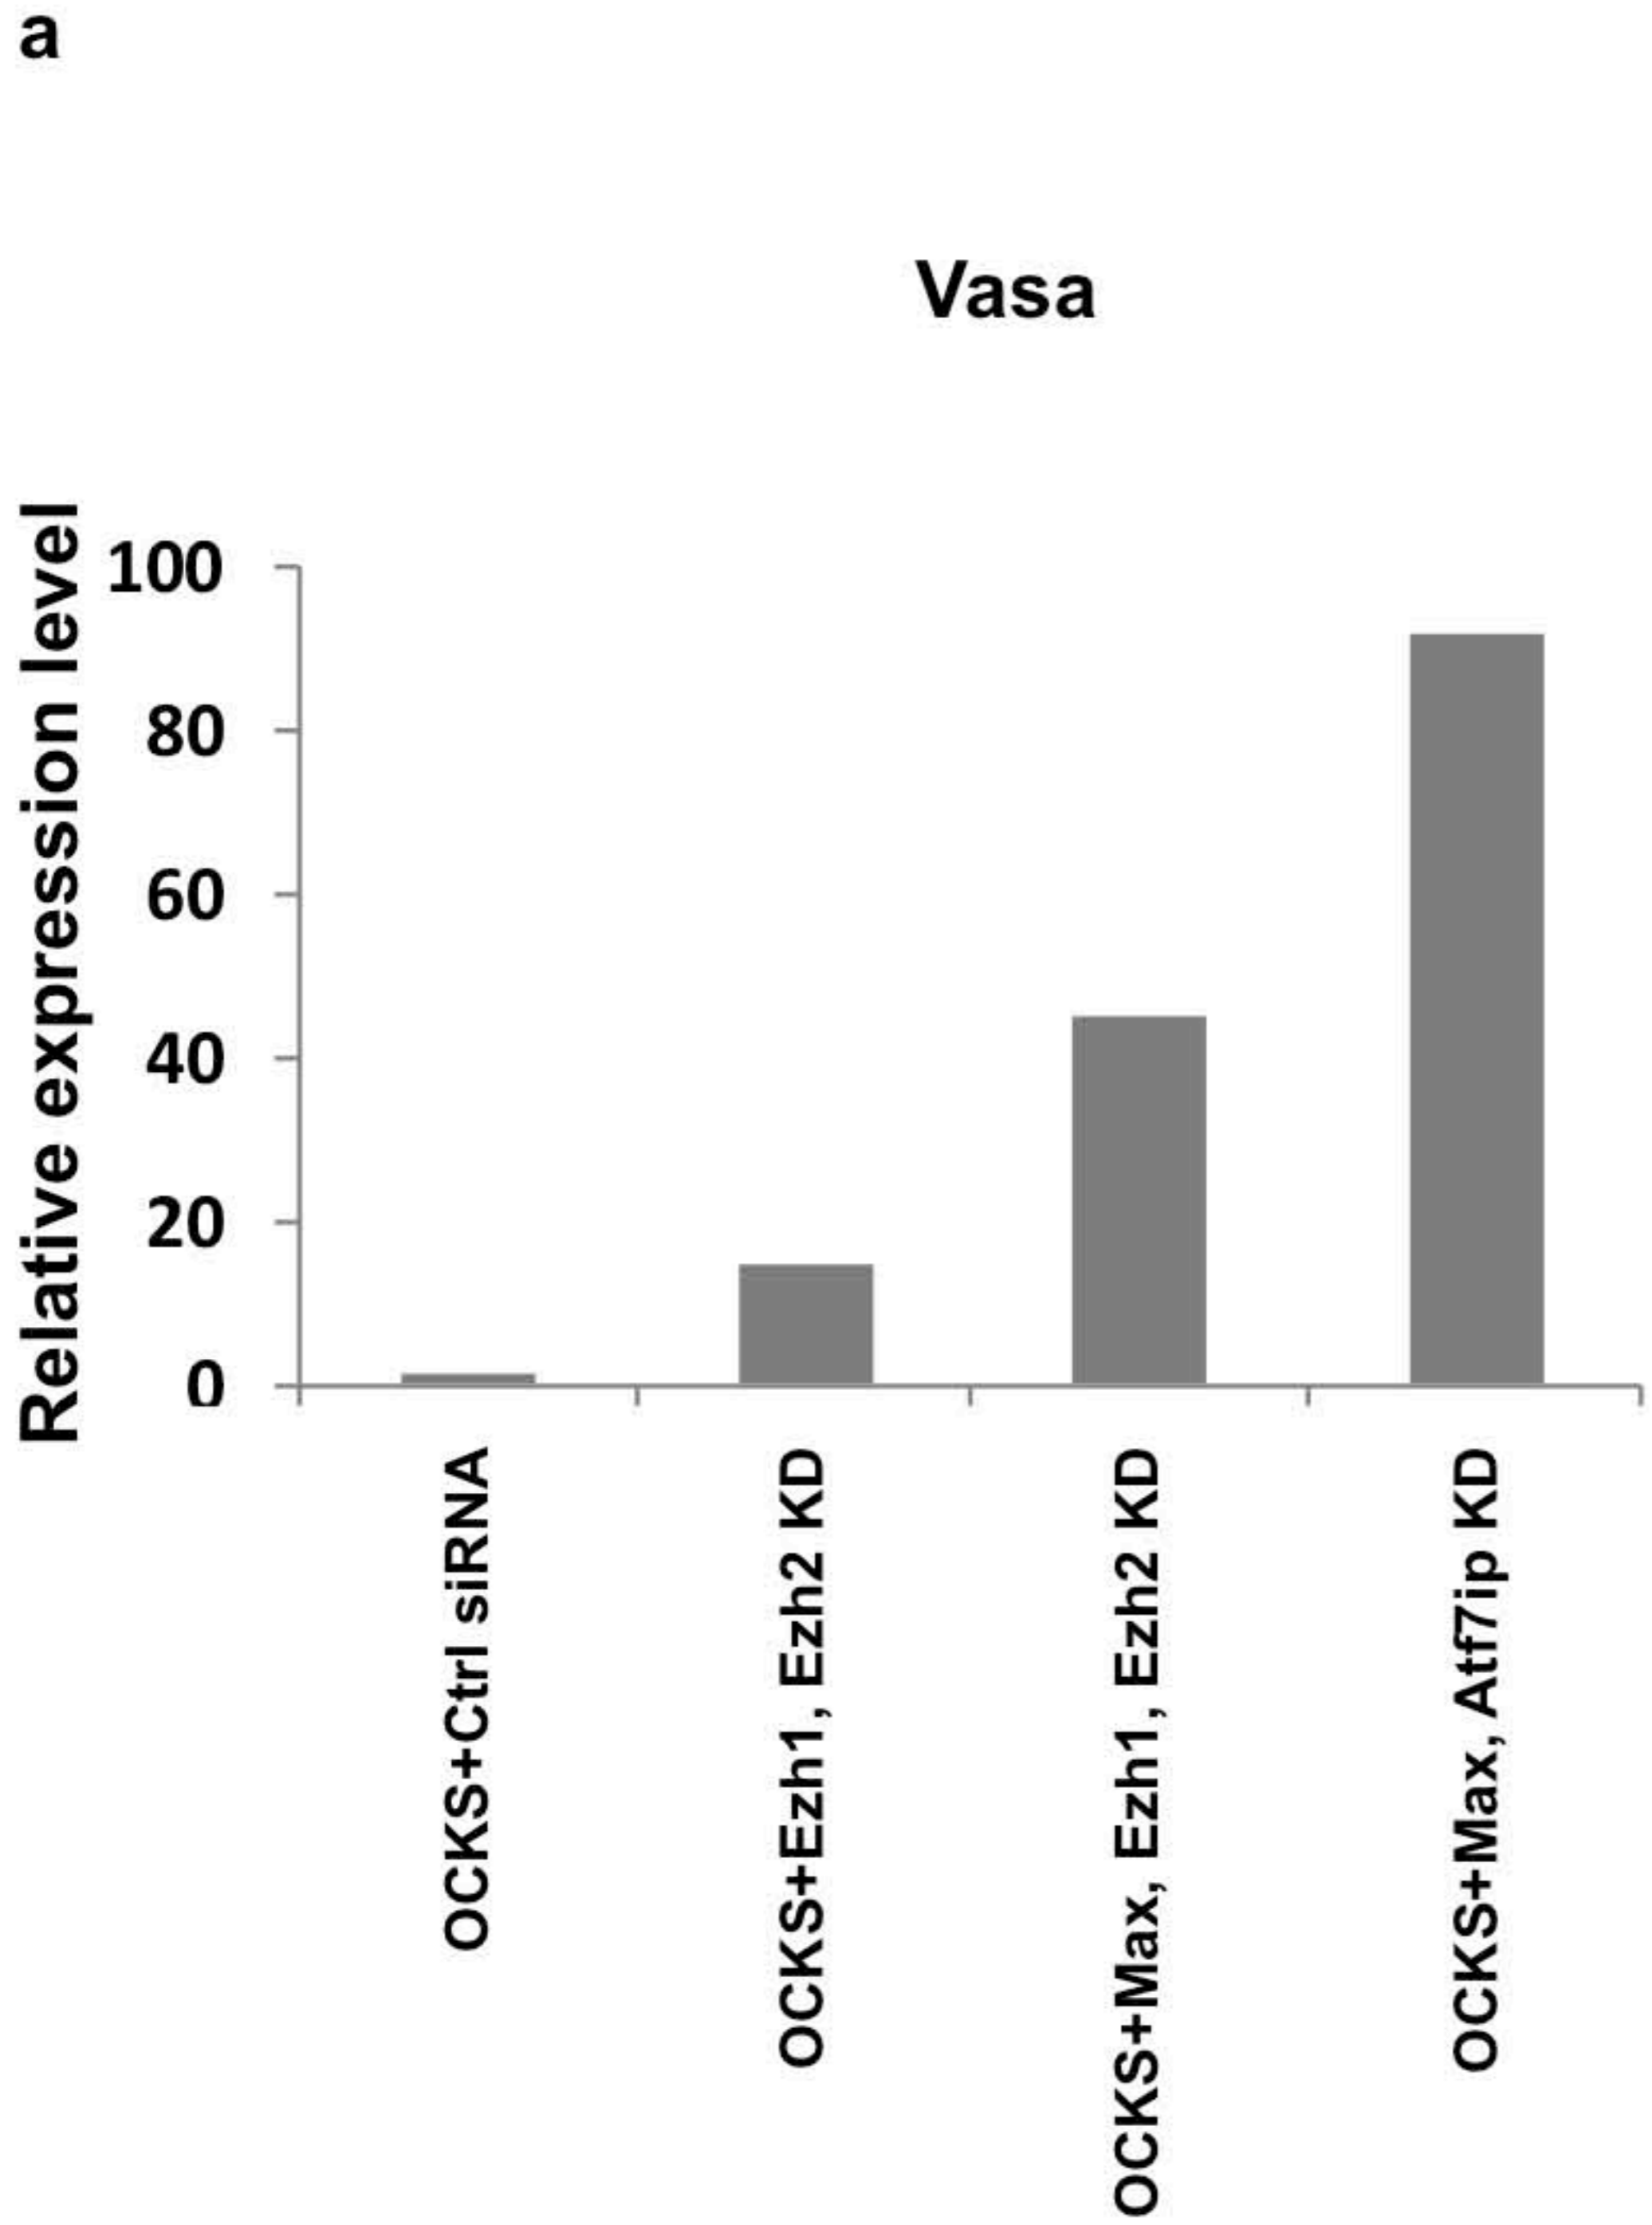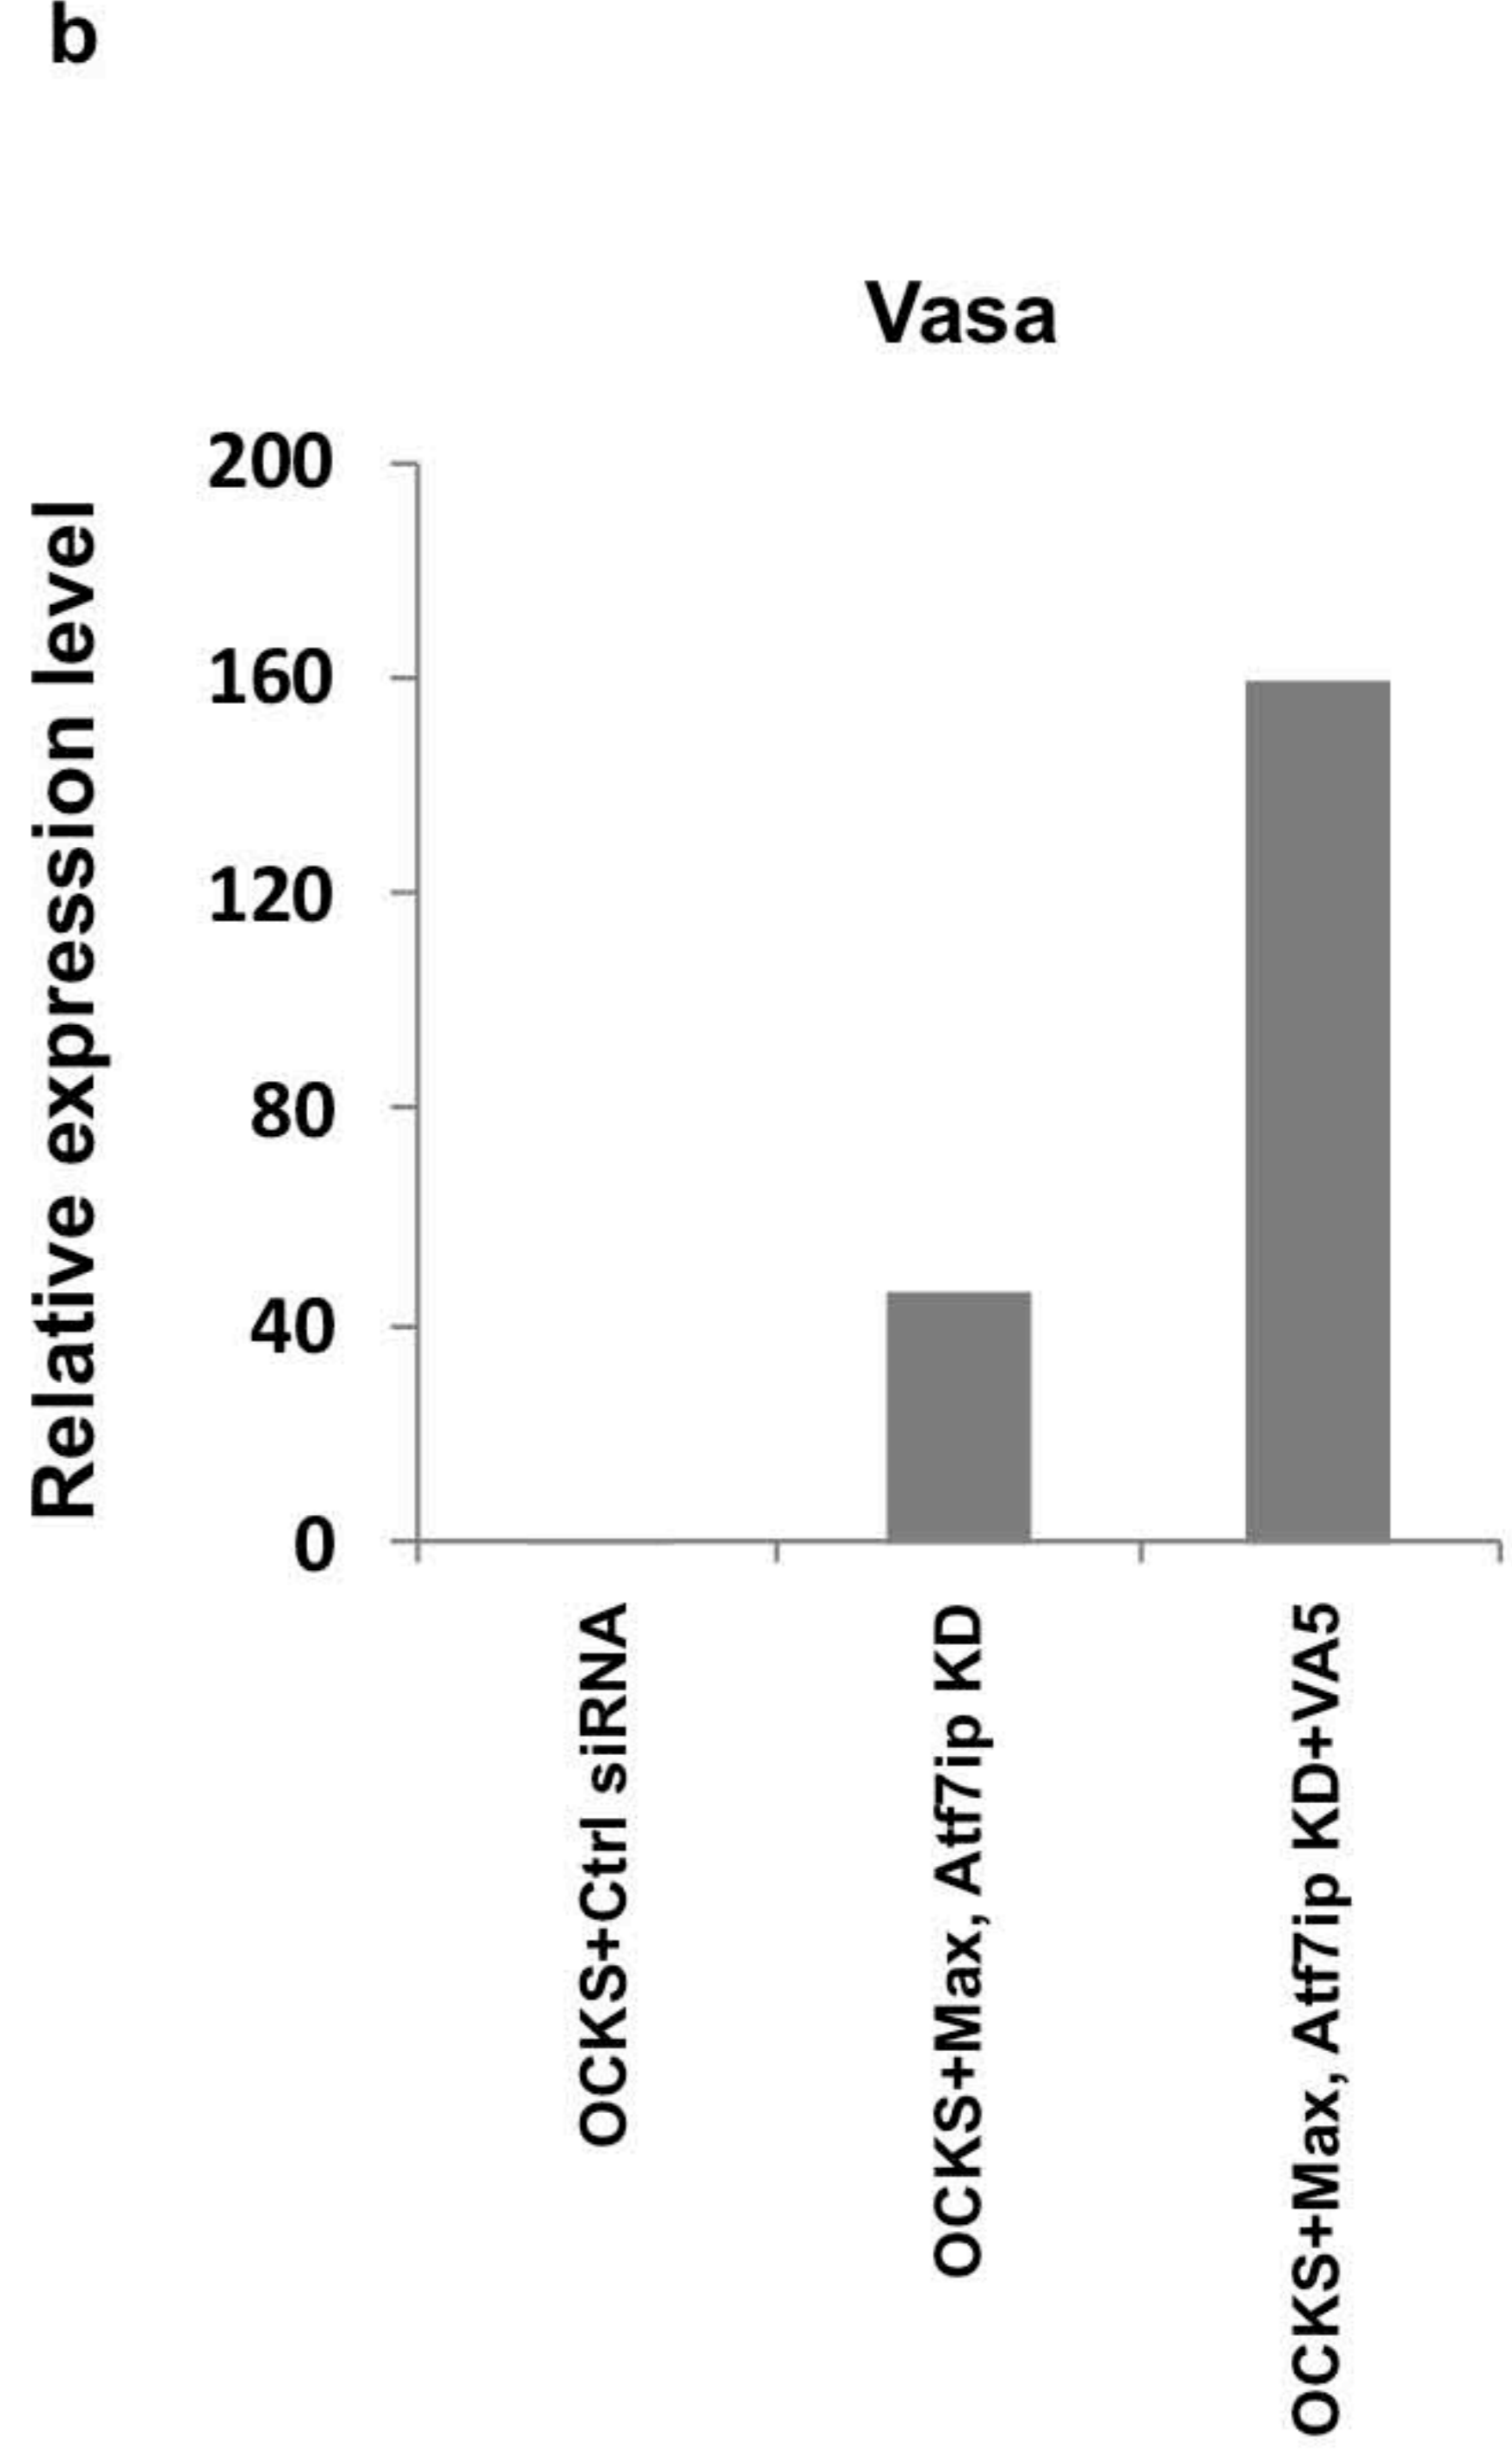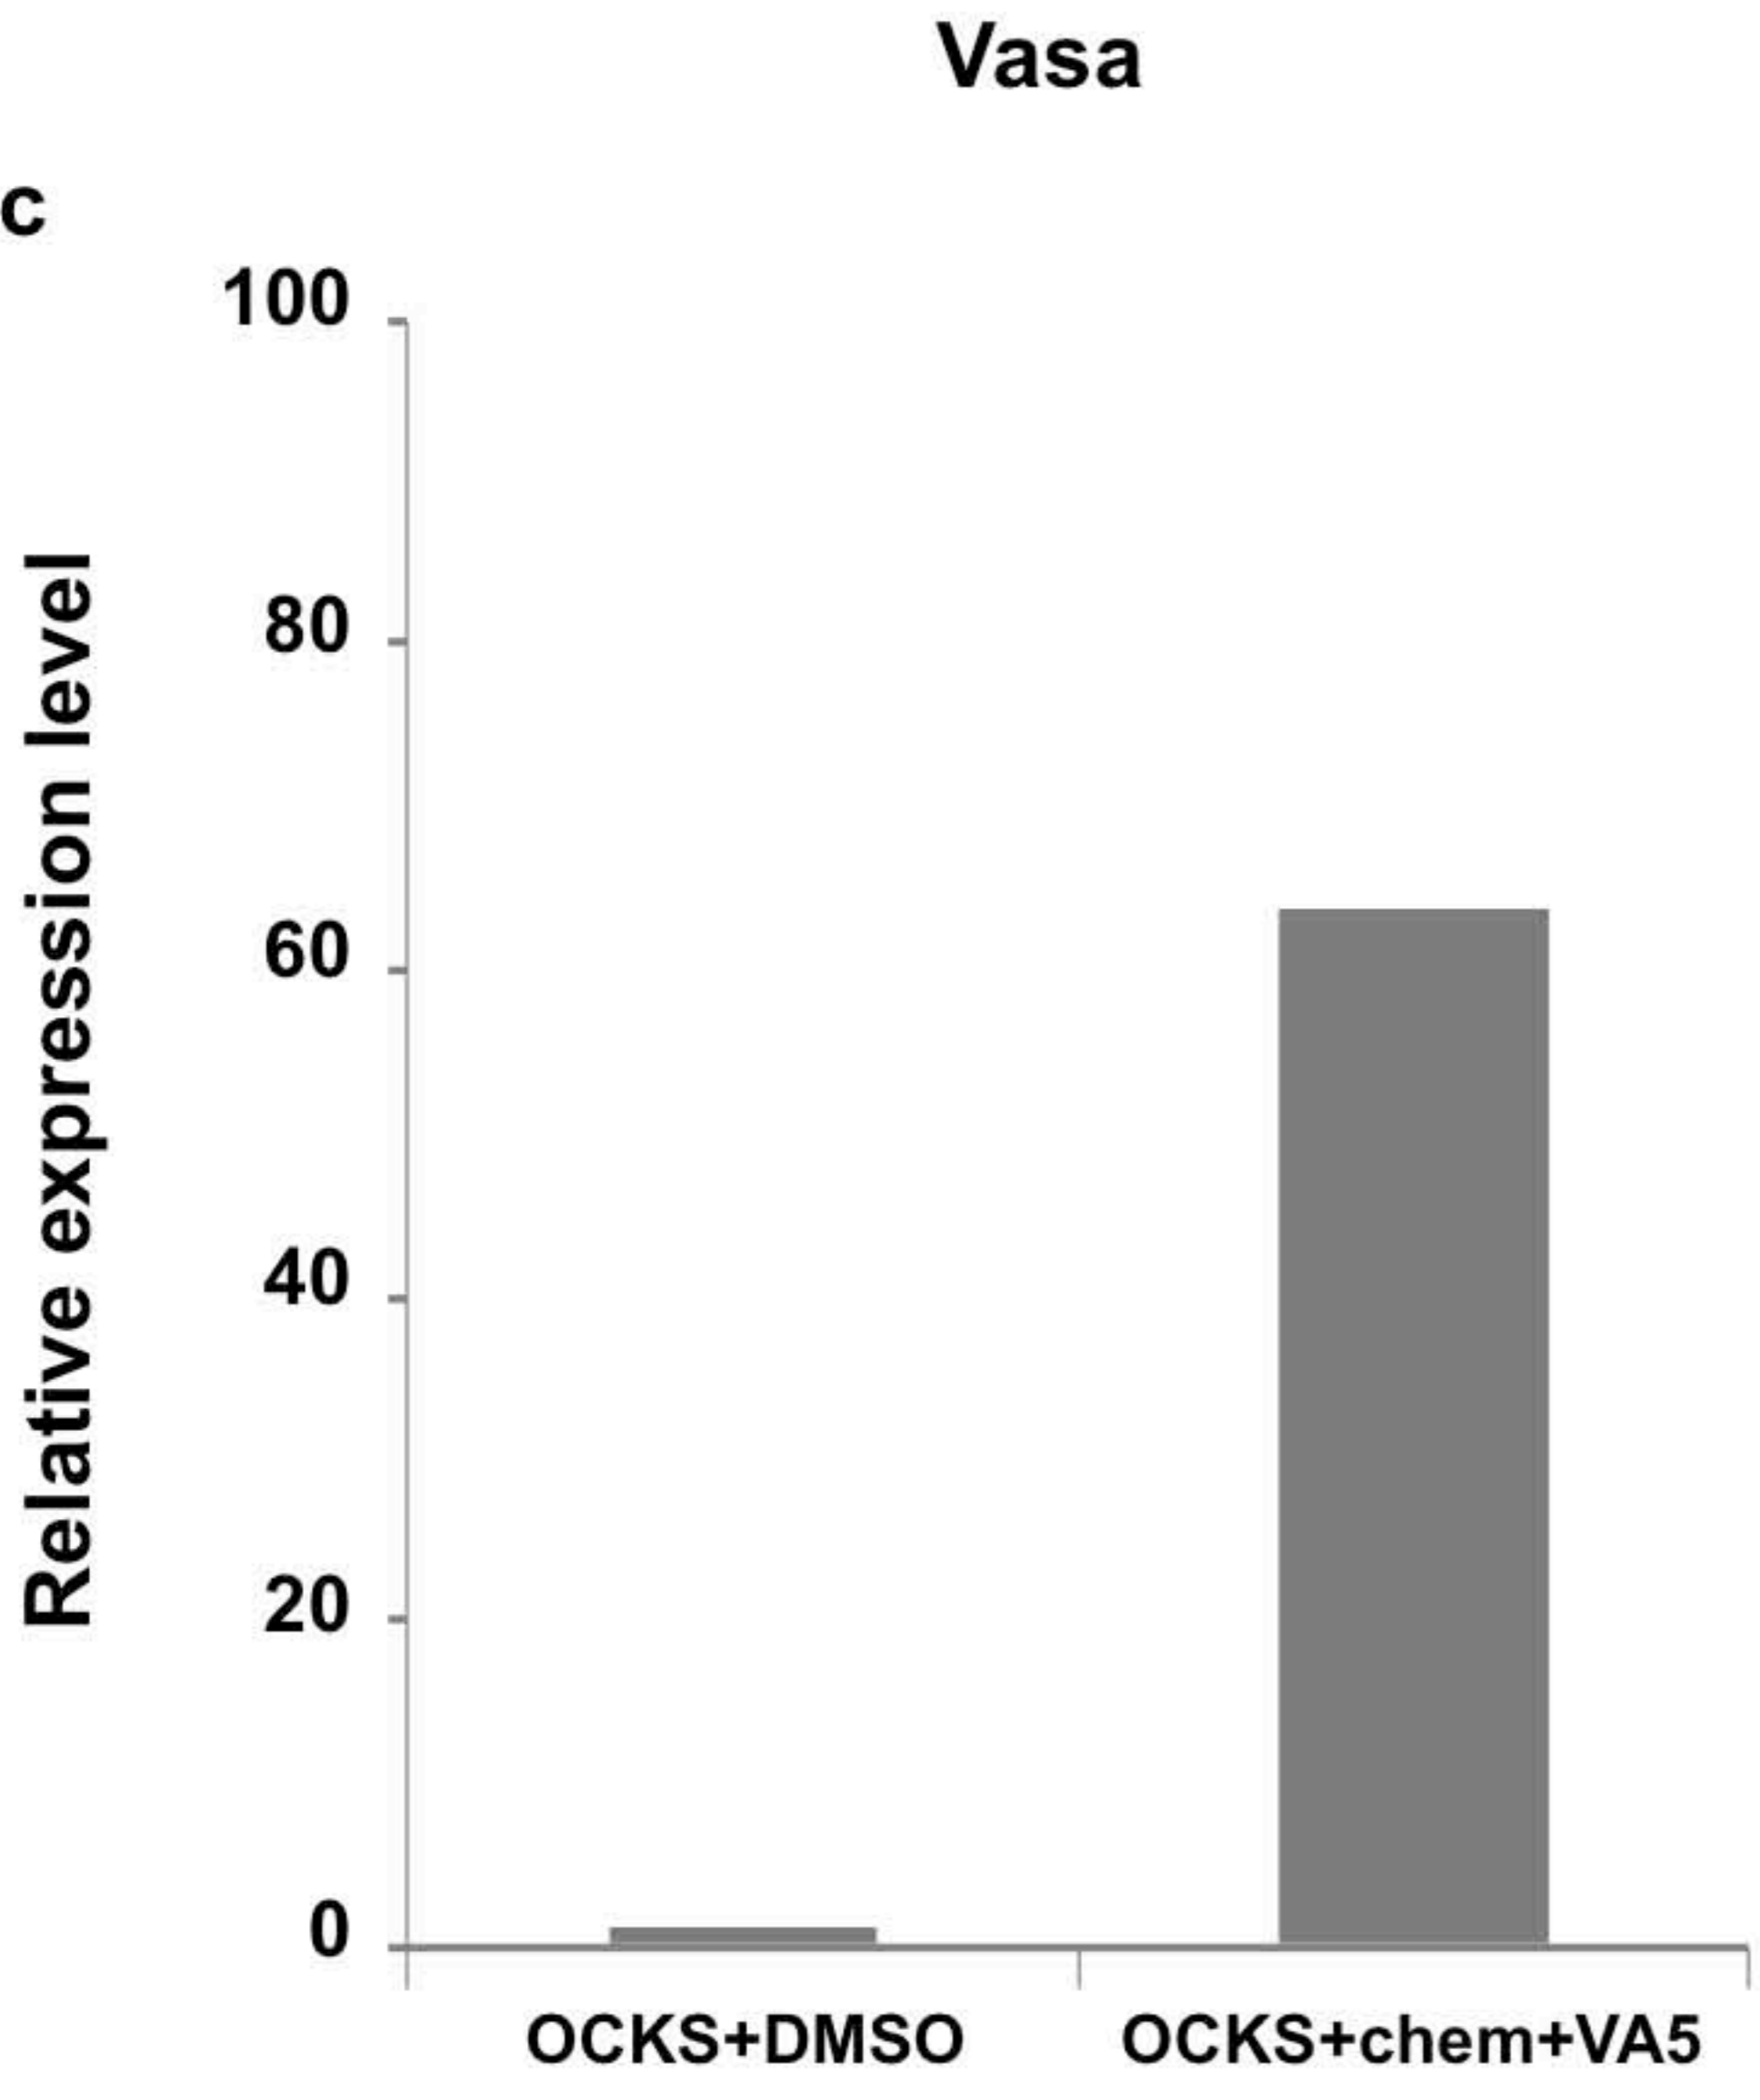

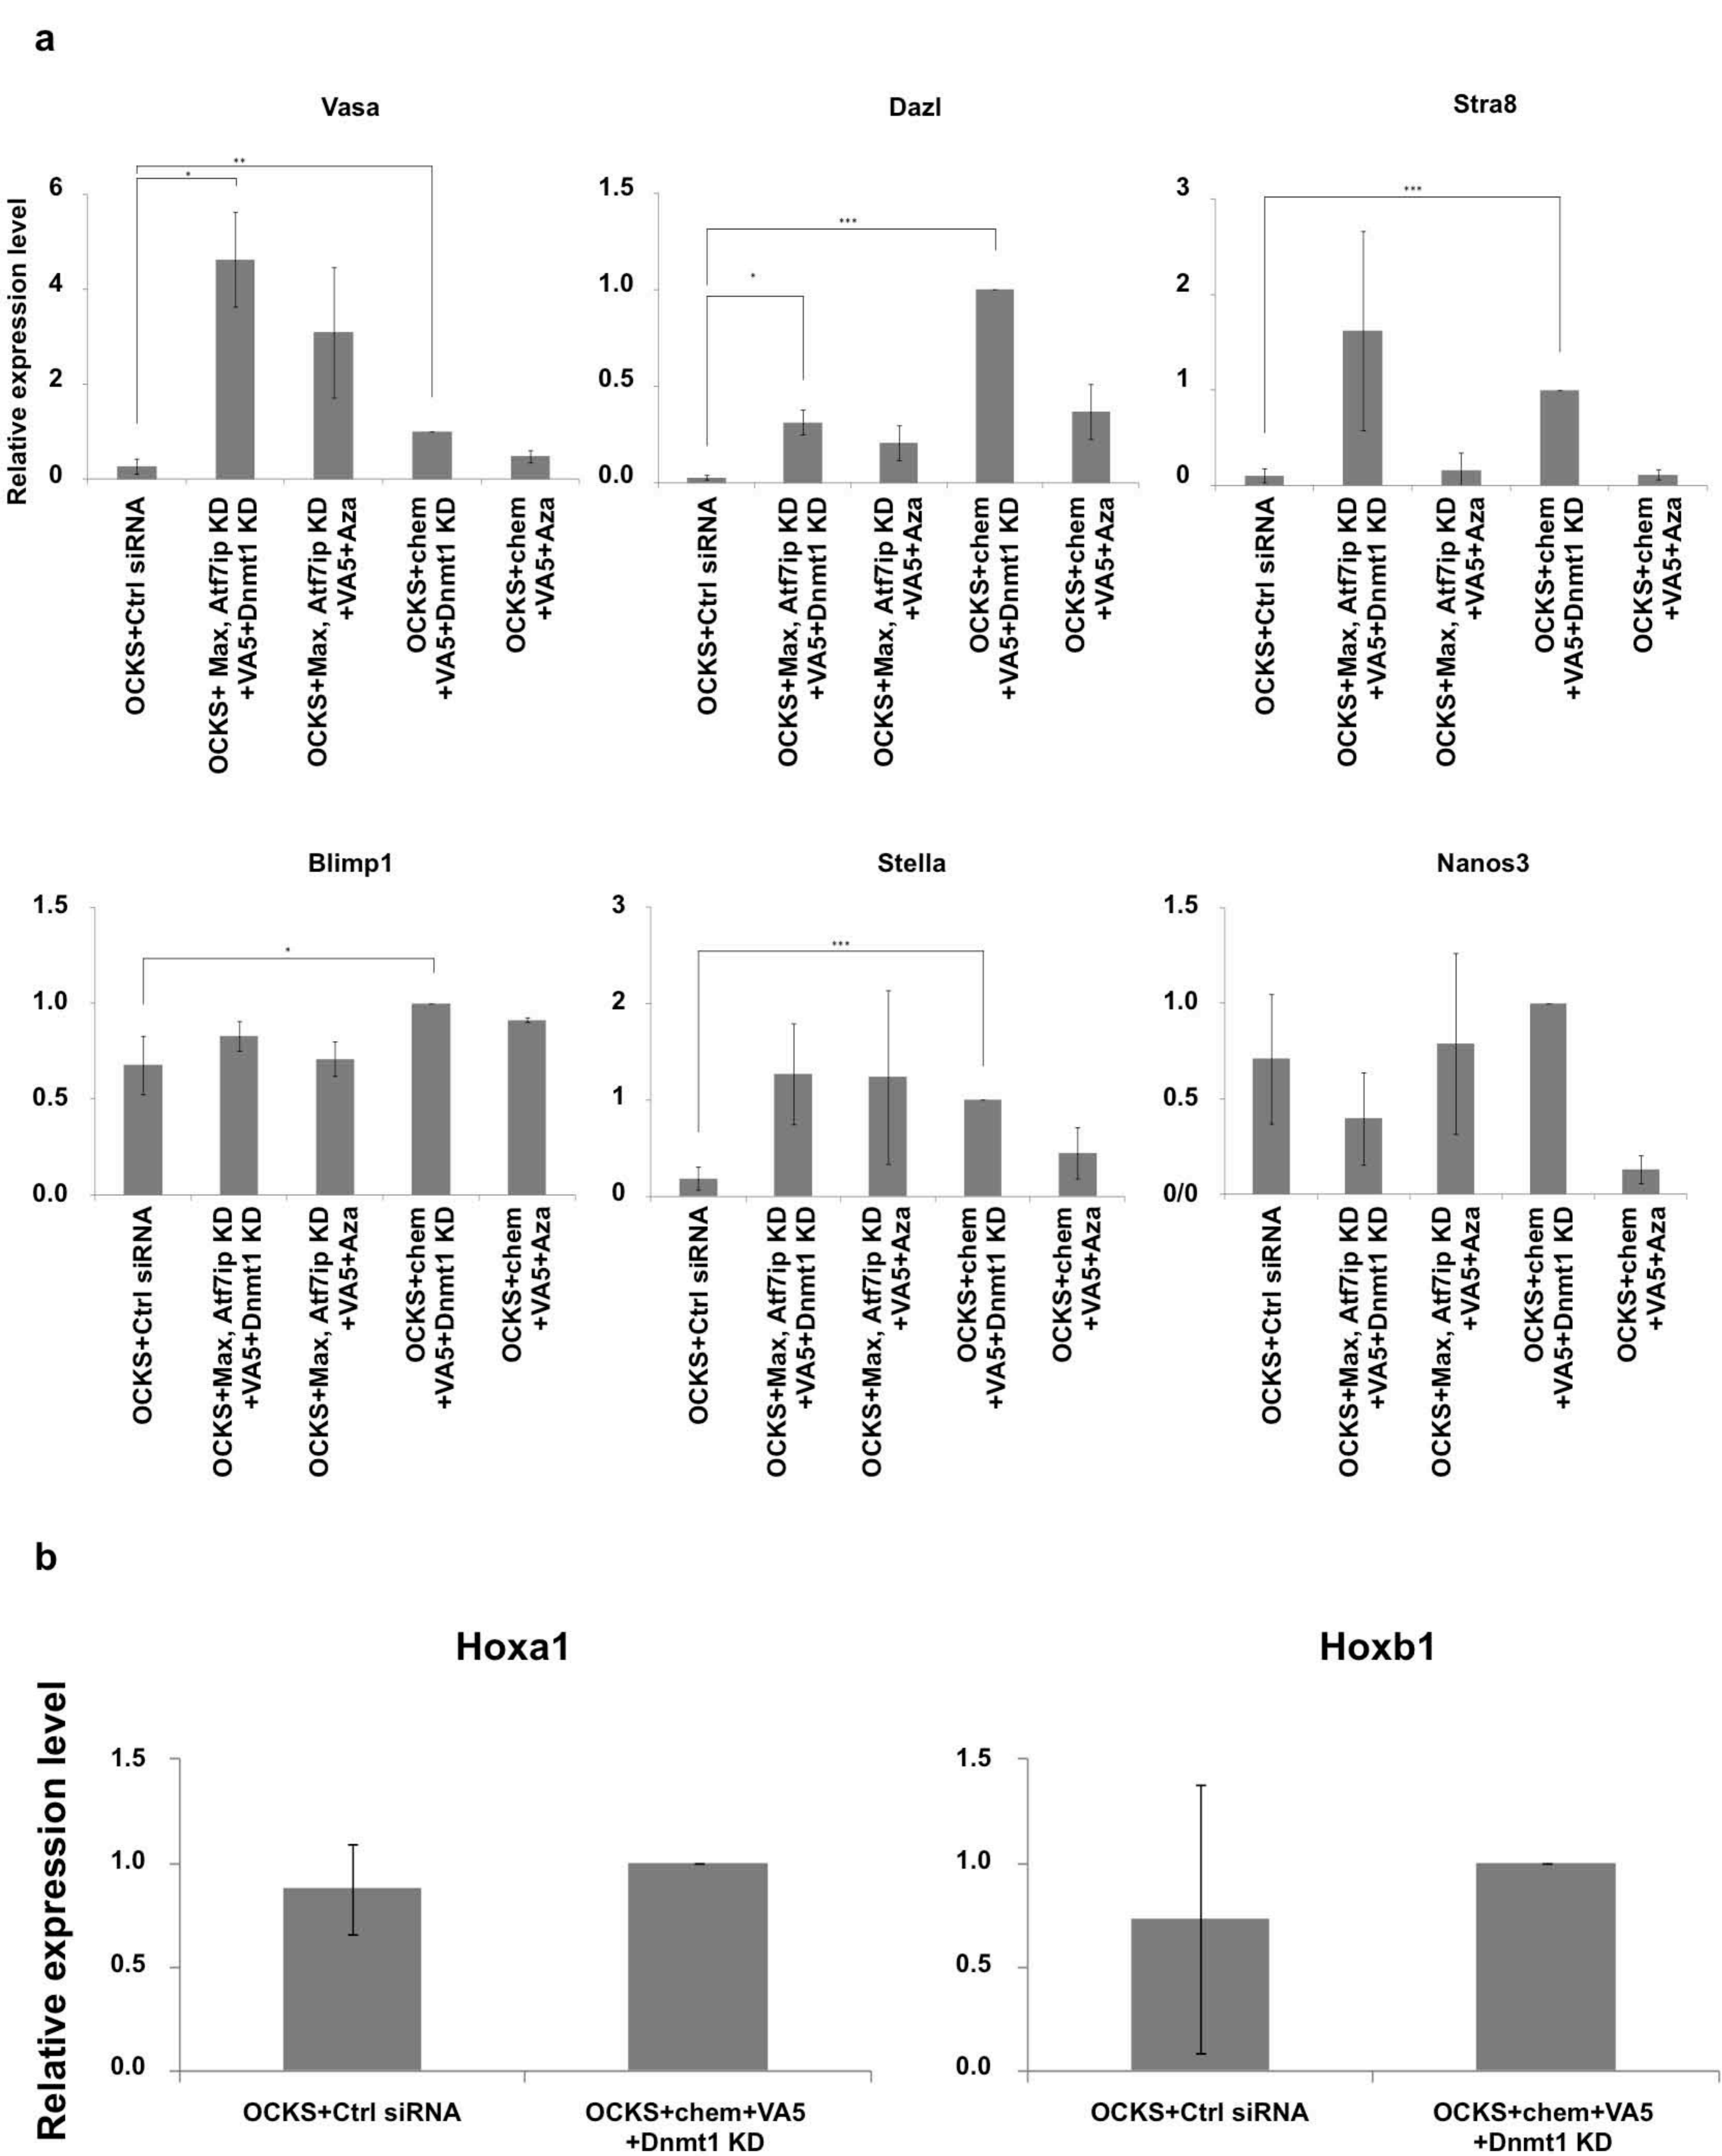

### Vasa

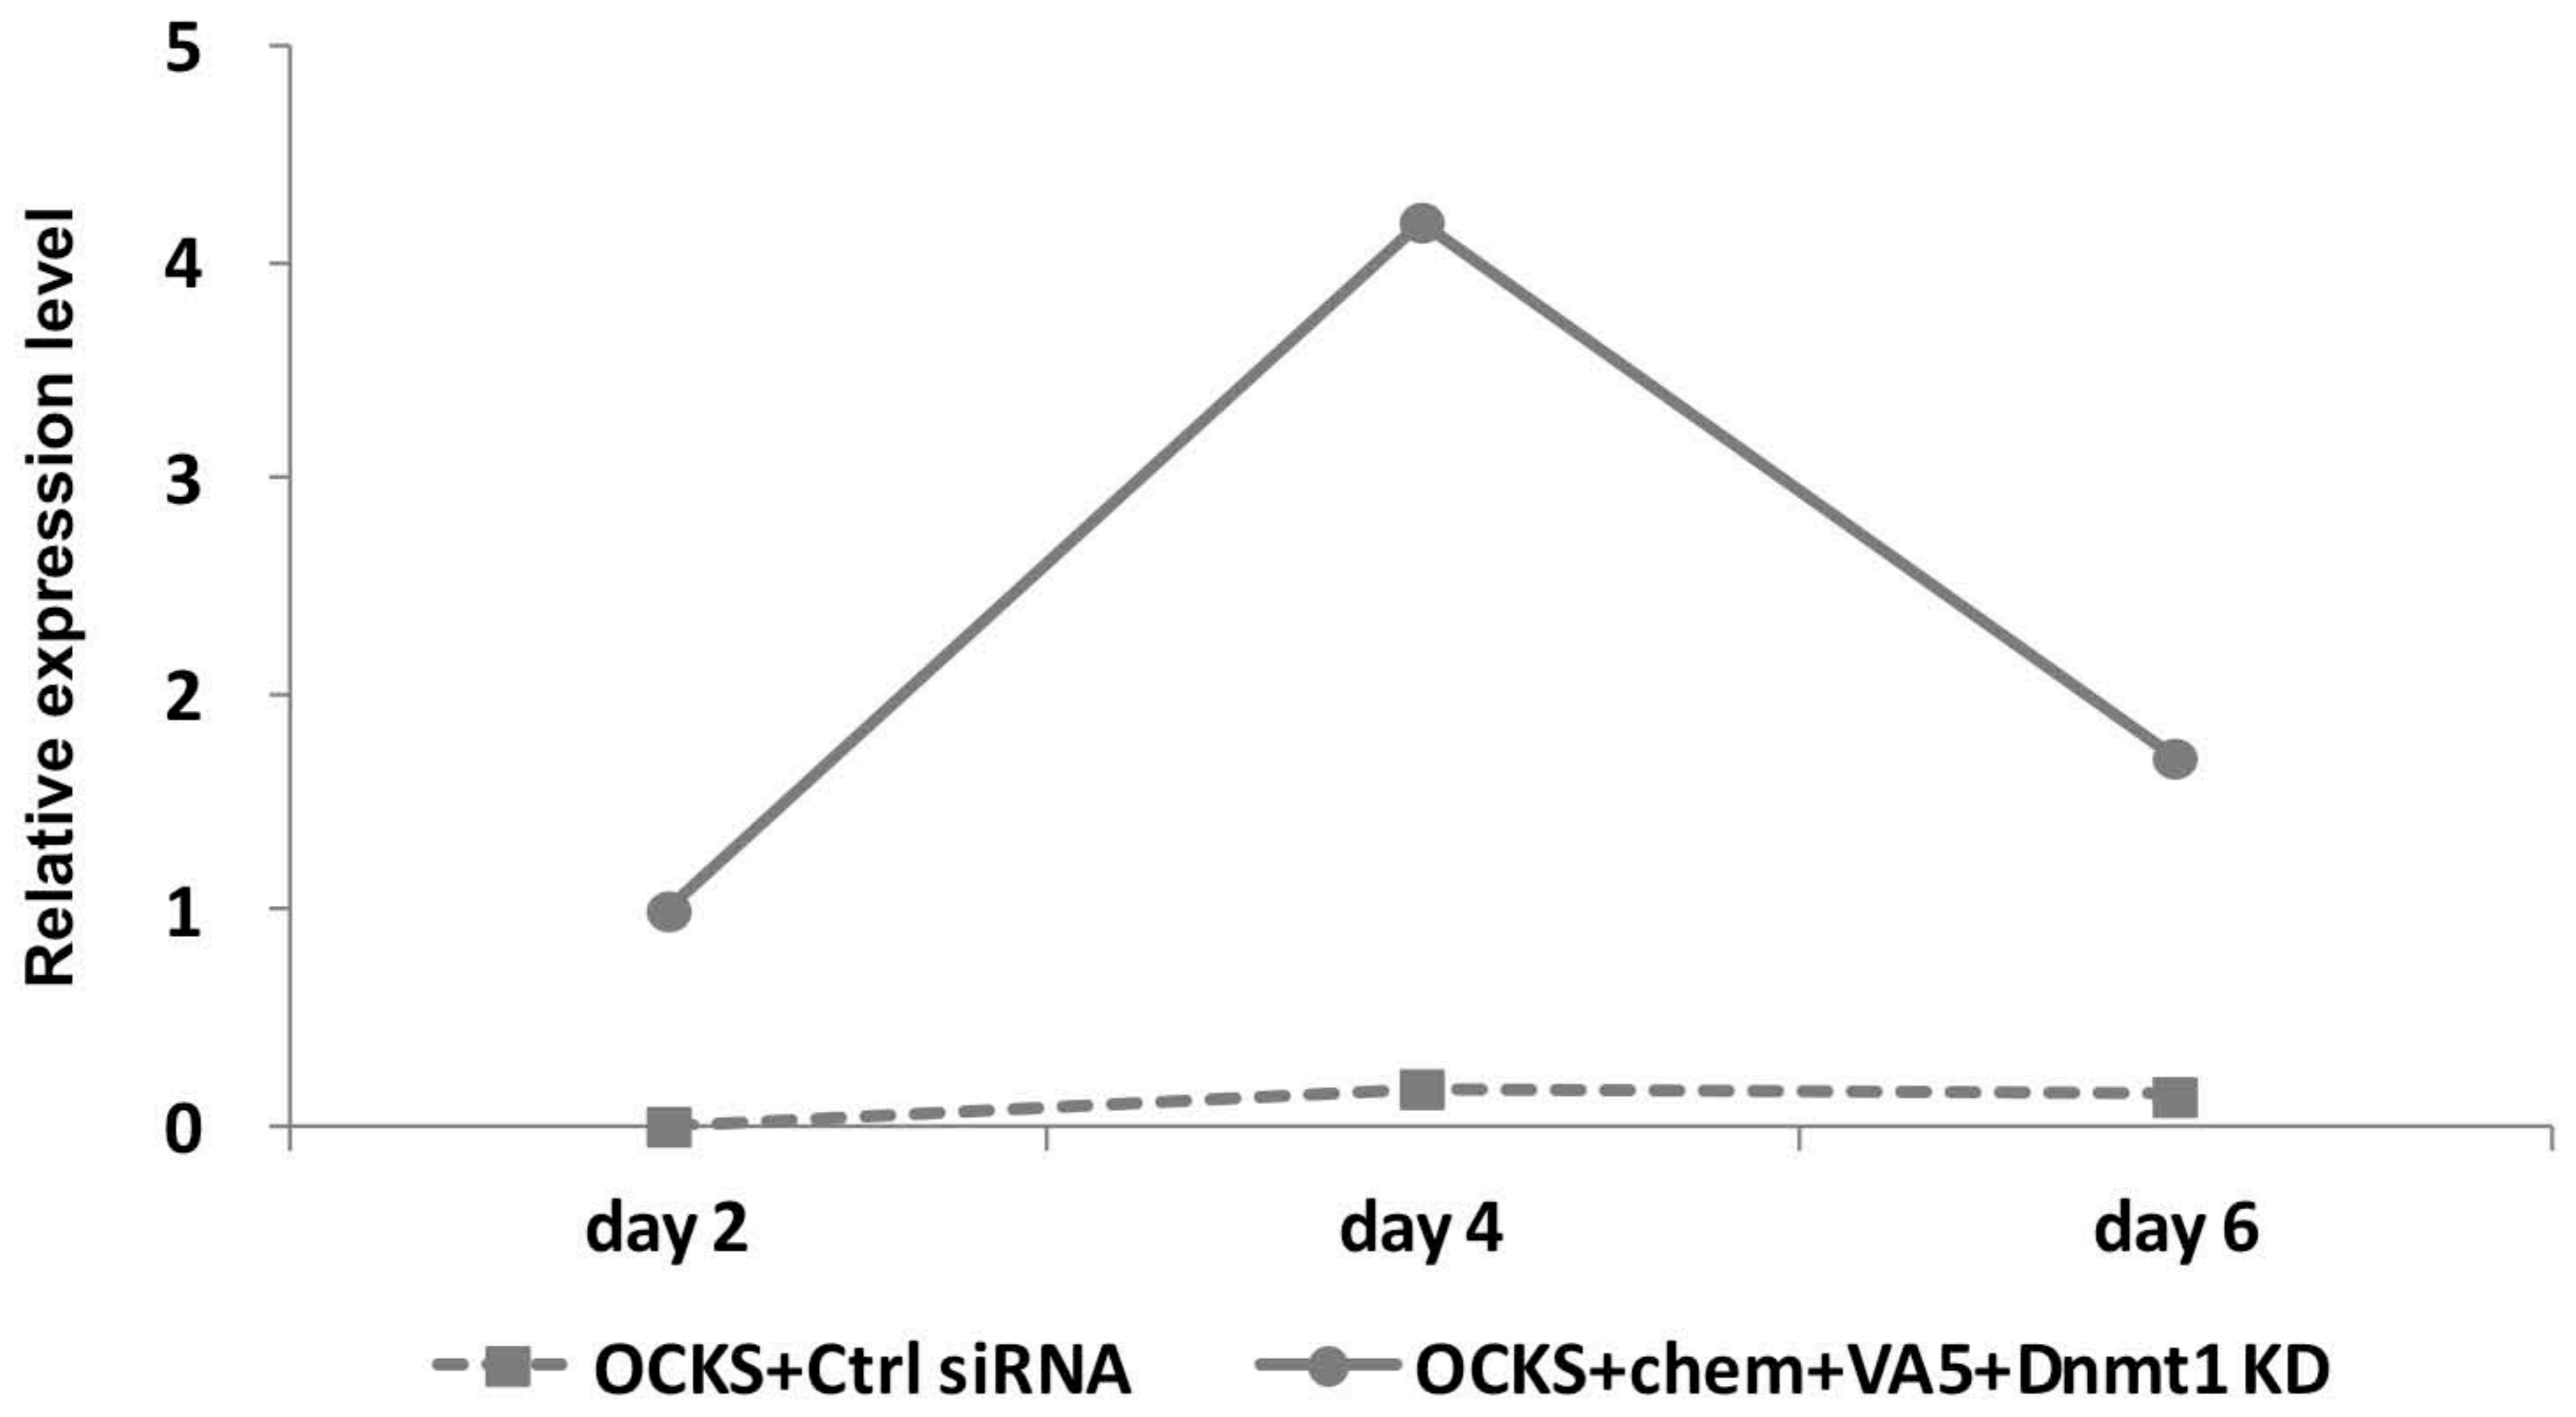

**a**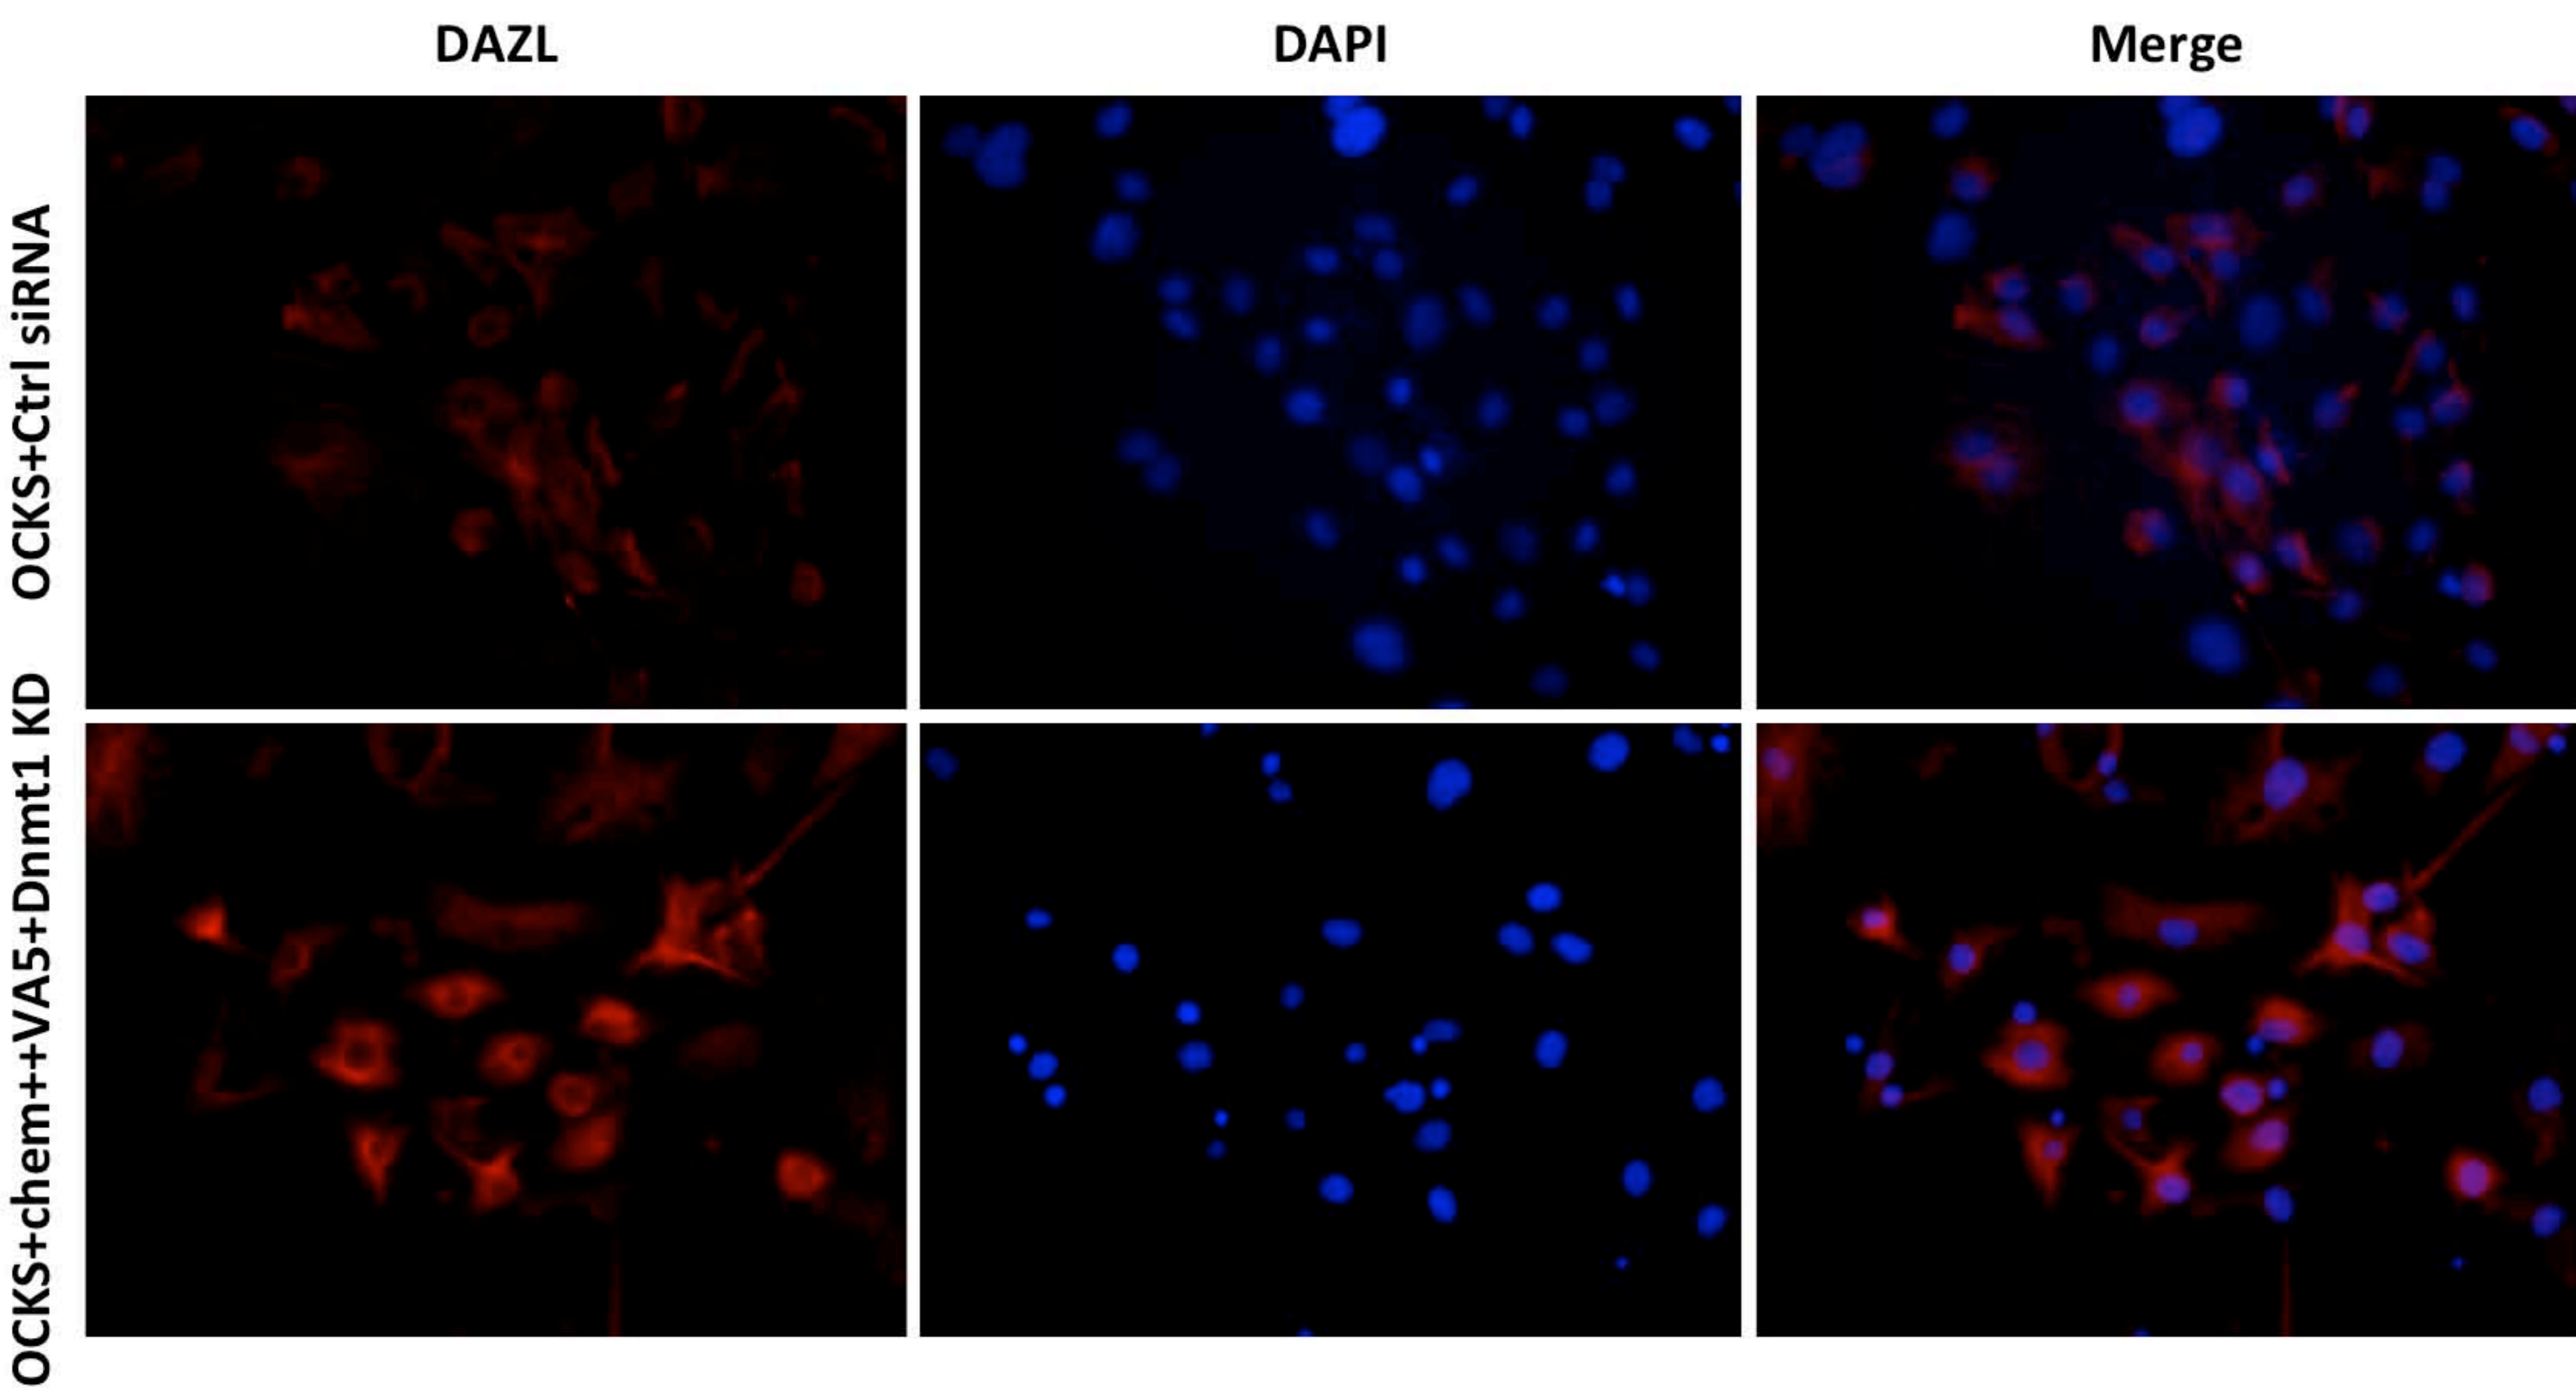**b**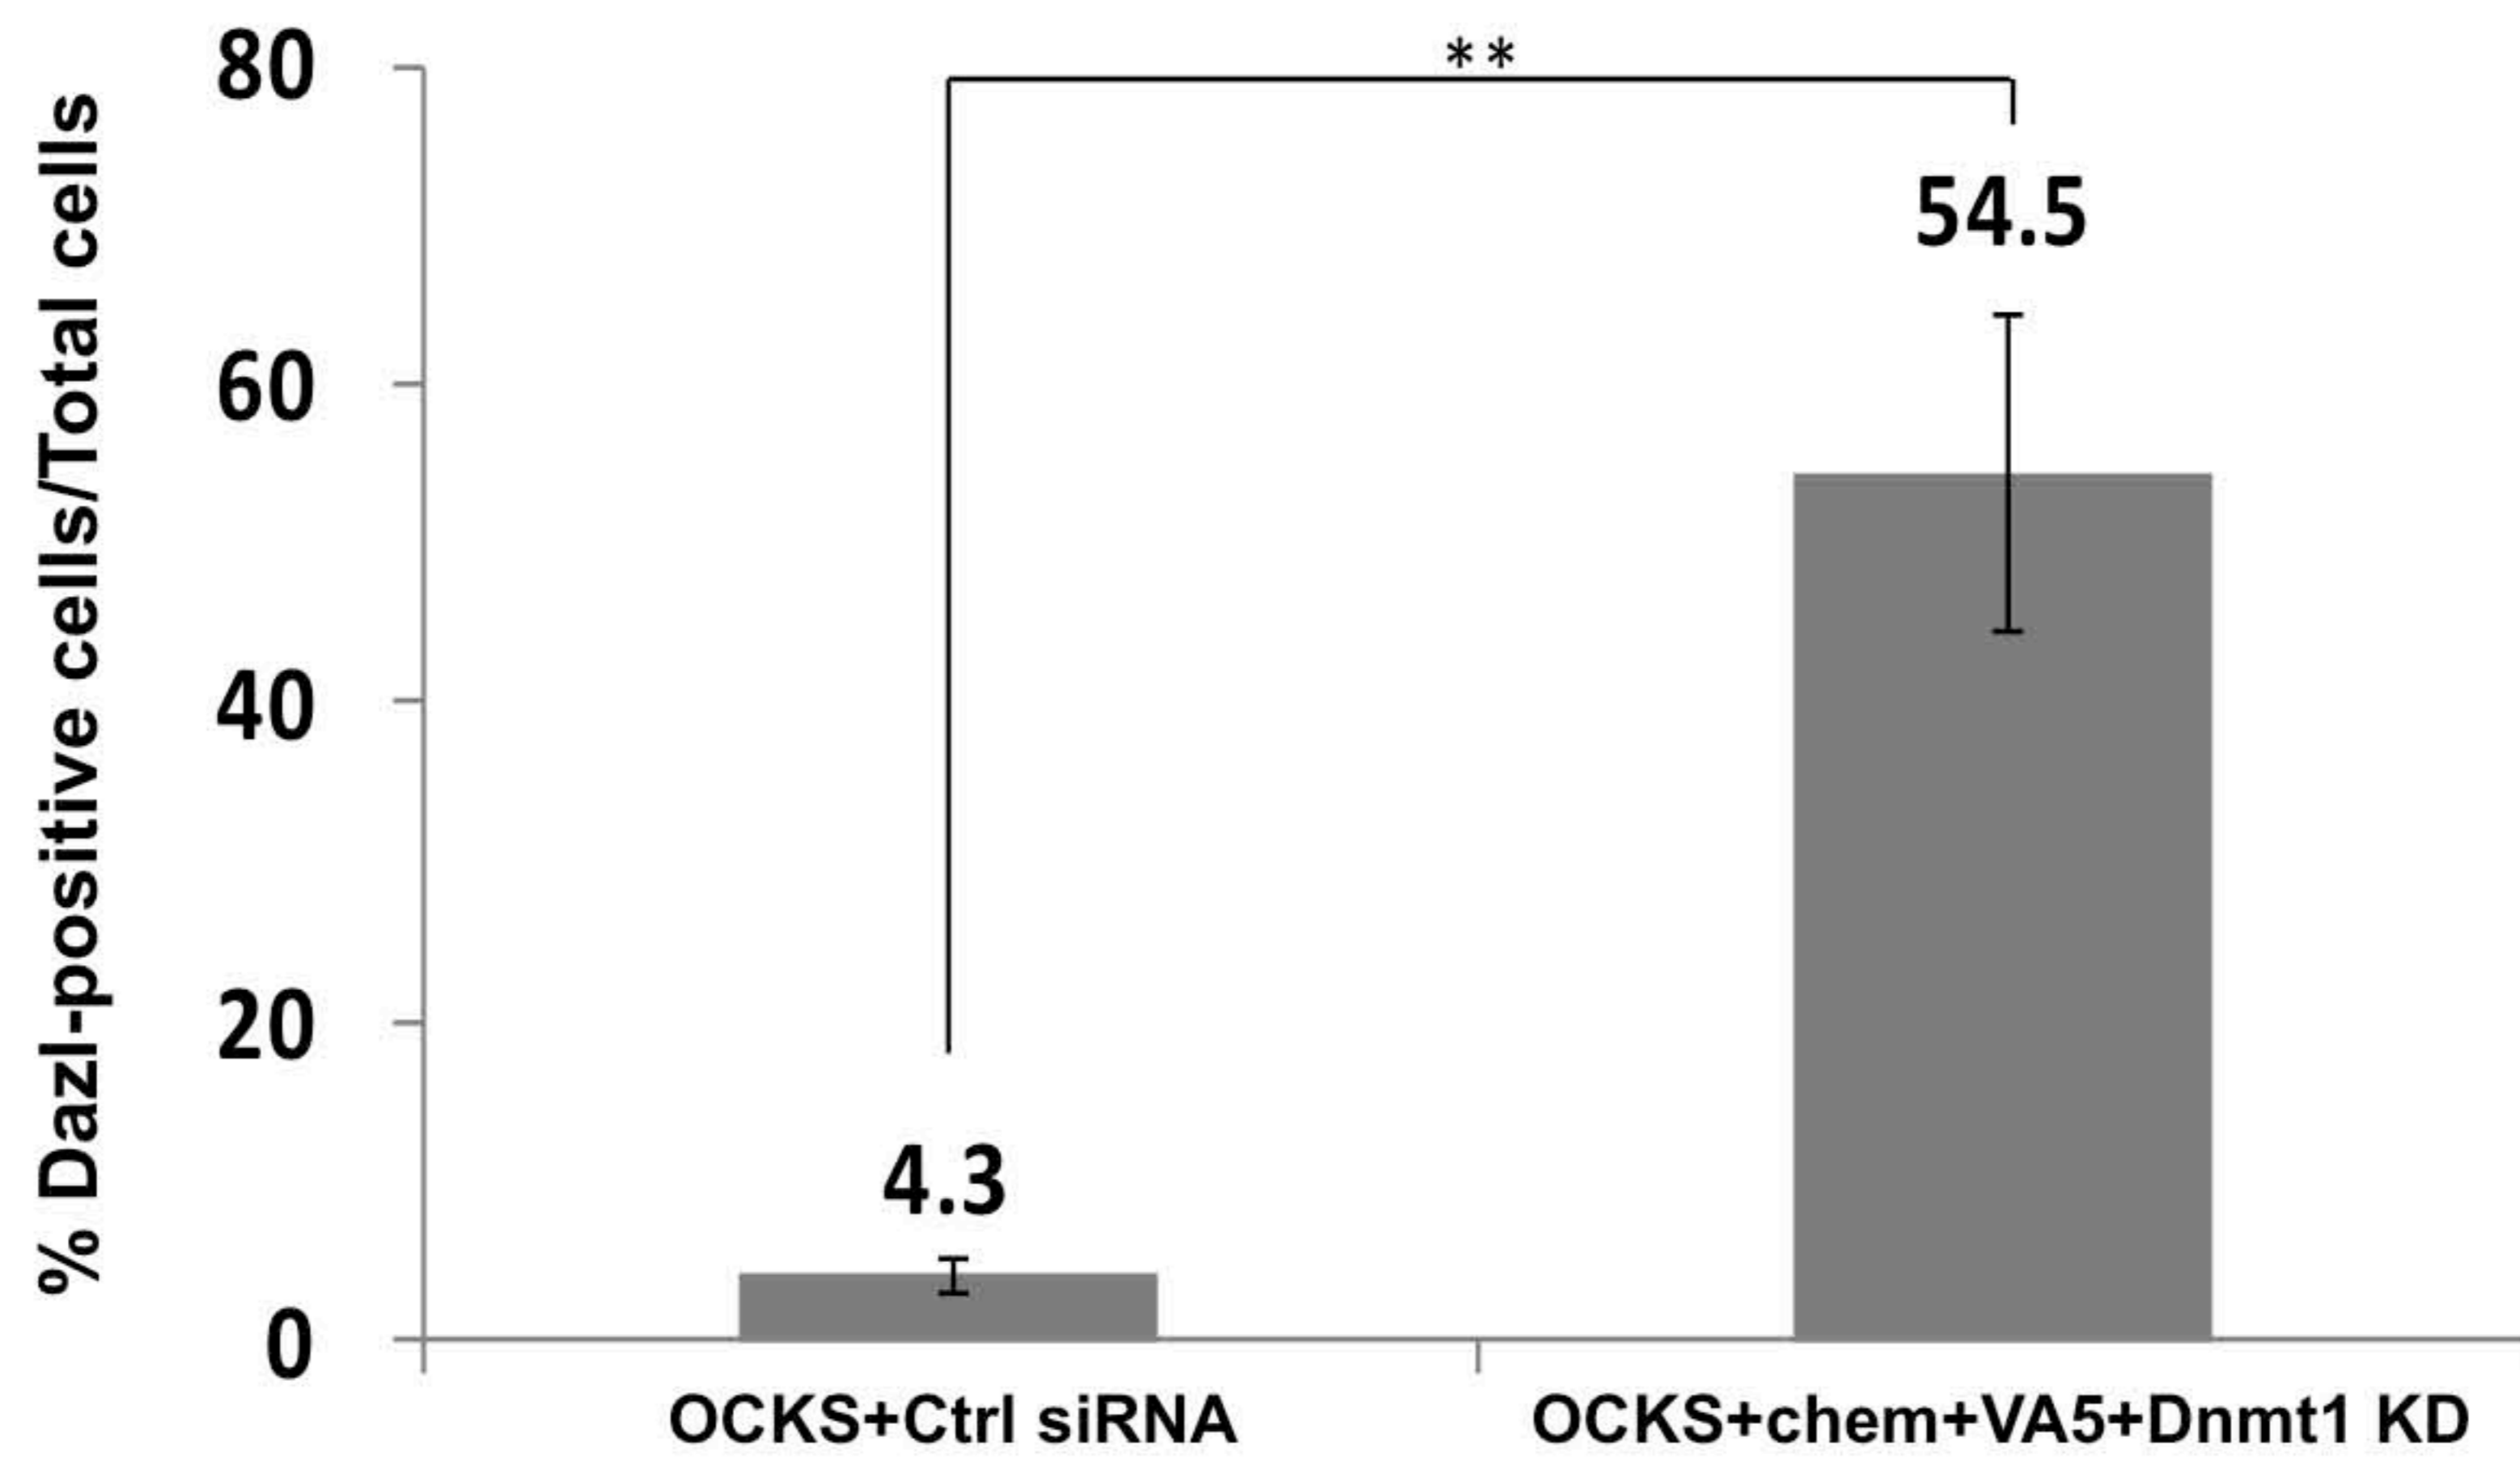

**a**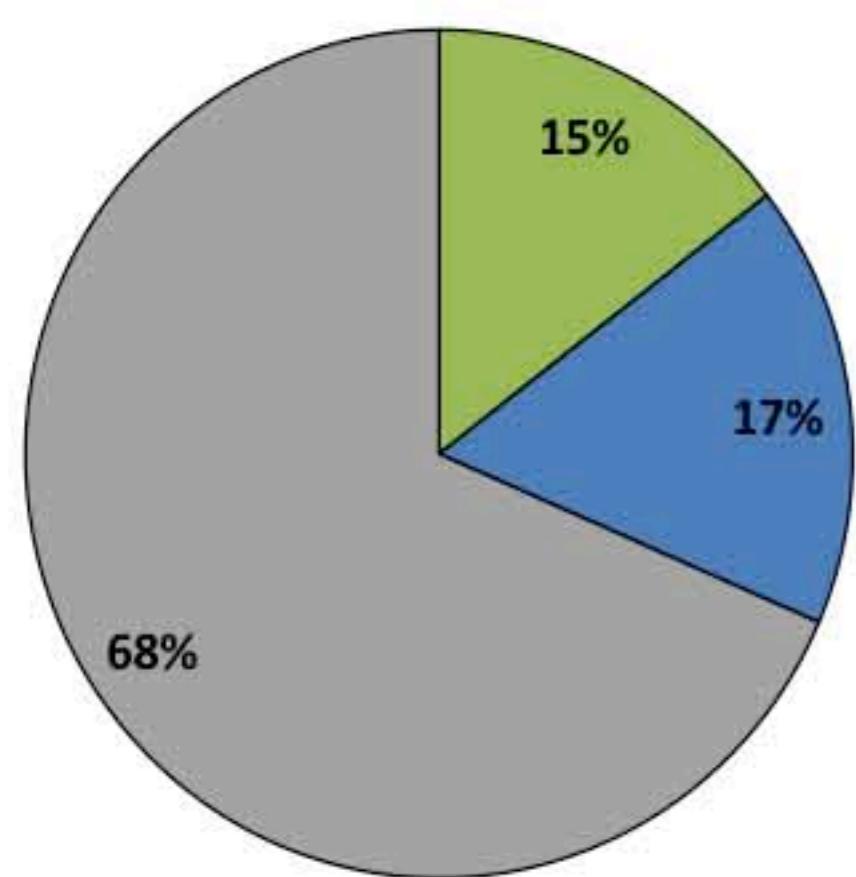

■ up-regulated genes  
■ down-regulated genes  
■ unchanged genes

**b**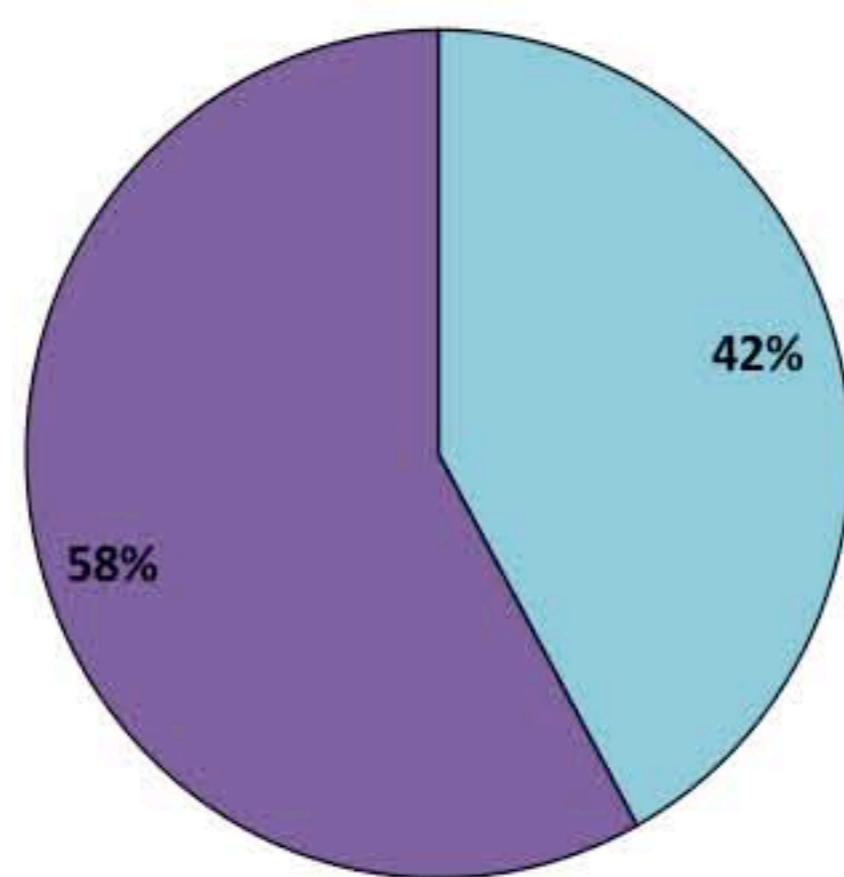

■ metabolic process  
■ other

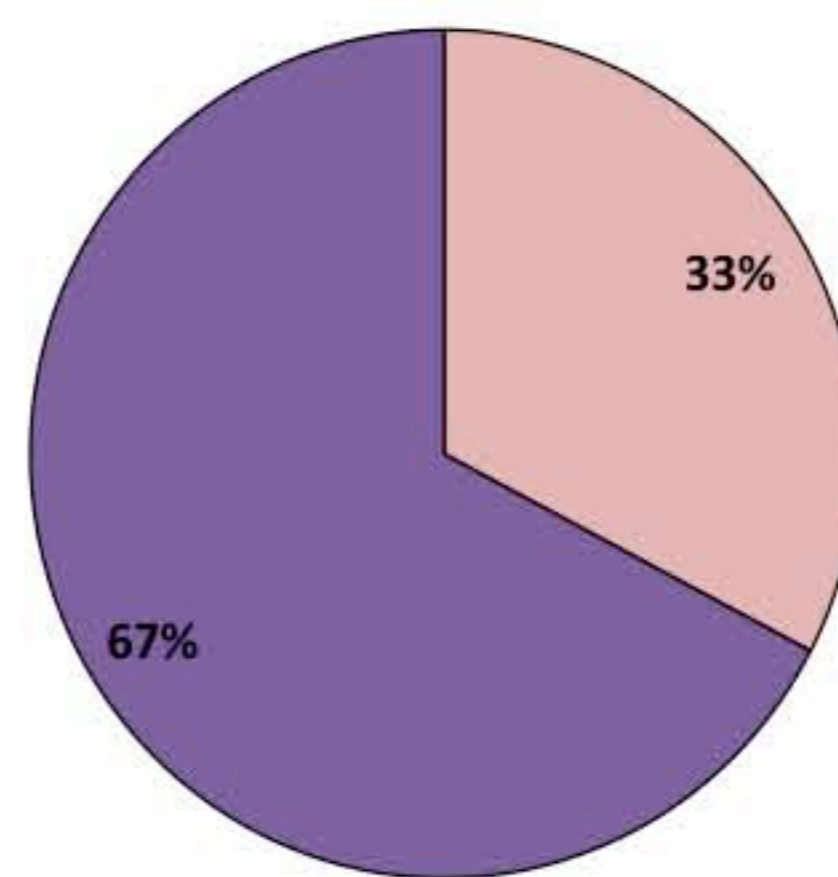

■ response to stimulus  
■ other

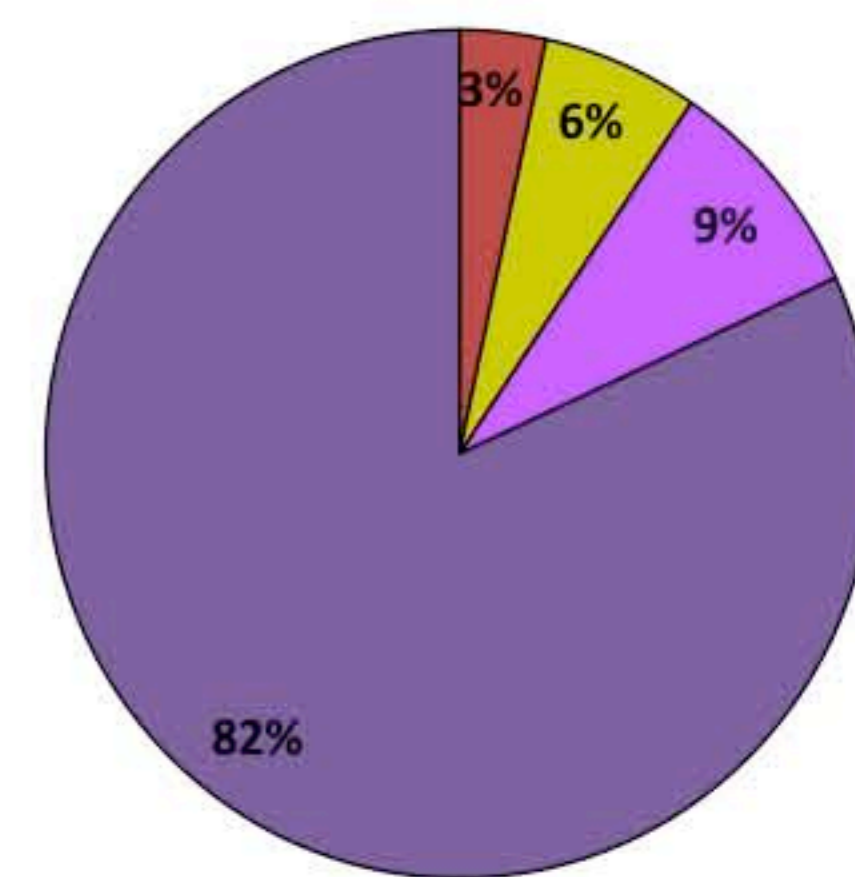

■ germ cell-specific genes  
■ nervous system-specific genes  
■ immune system-specific genes  
■ other

**c**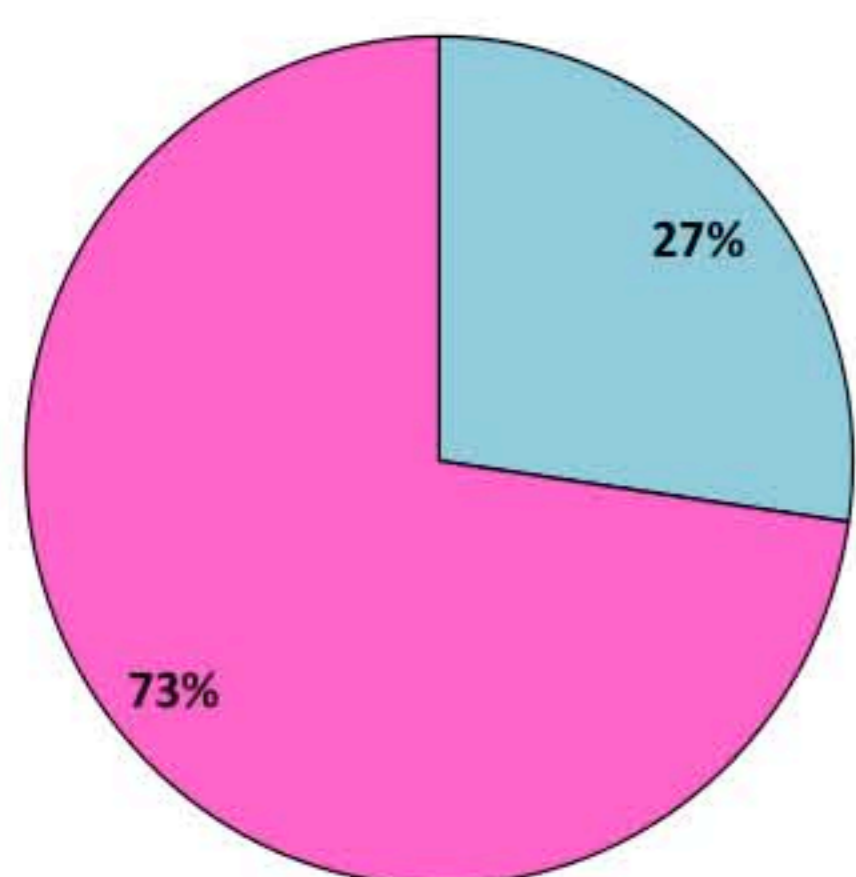

■ metabolic process  
■ other

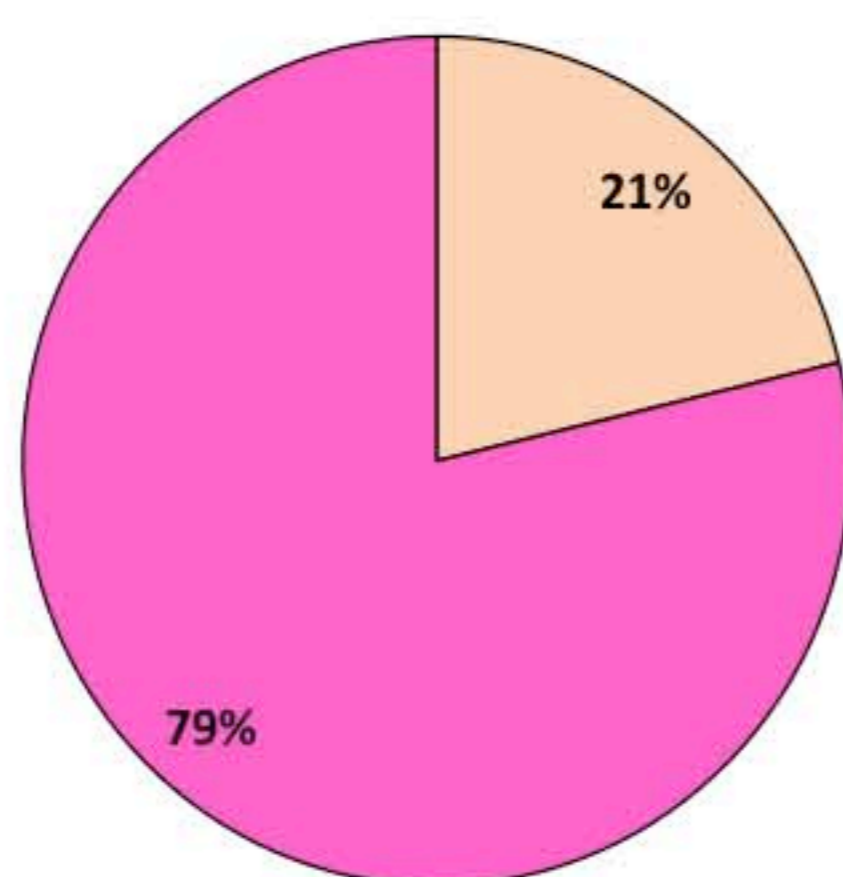

■ developmental process  
■ other

**d**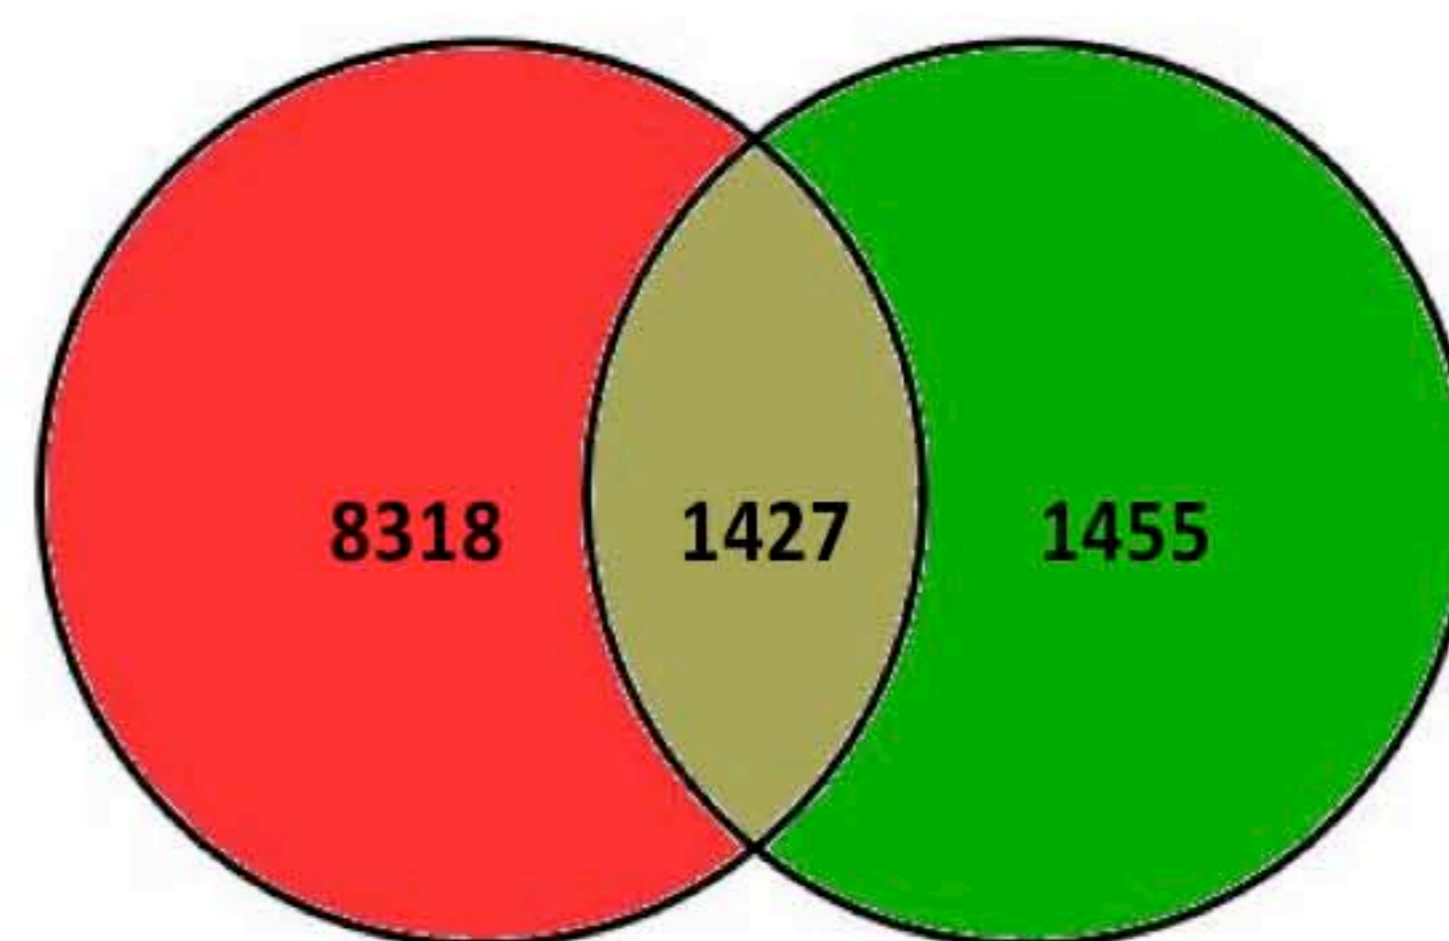

Up-regulated genes in E13.5 male PGCs vs MEFs

Up-regulated genes in OCKS+chem +VA5+Dnmt1 KD vs MEFs

**e**

<corrected p-value>

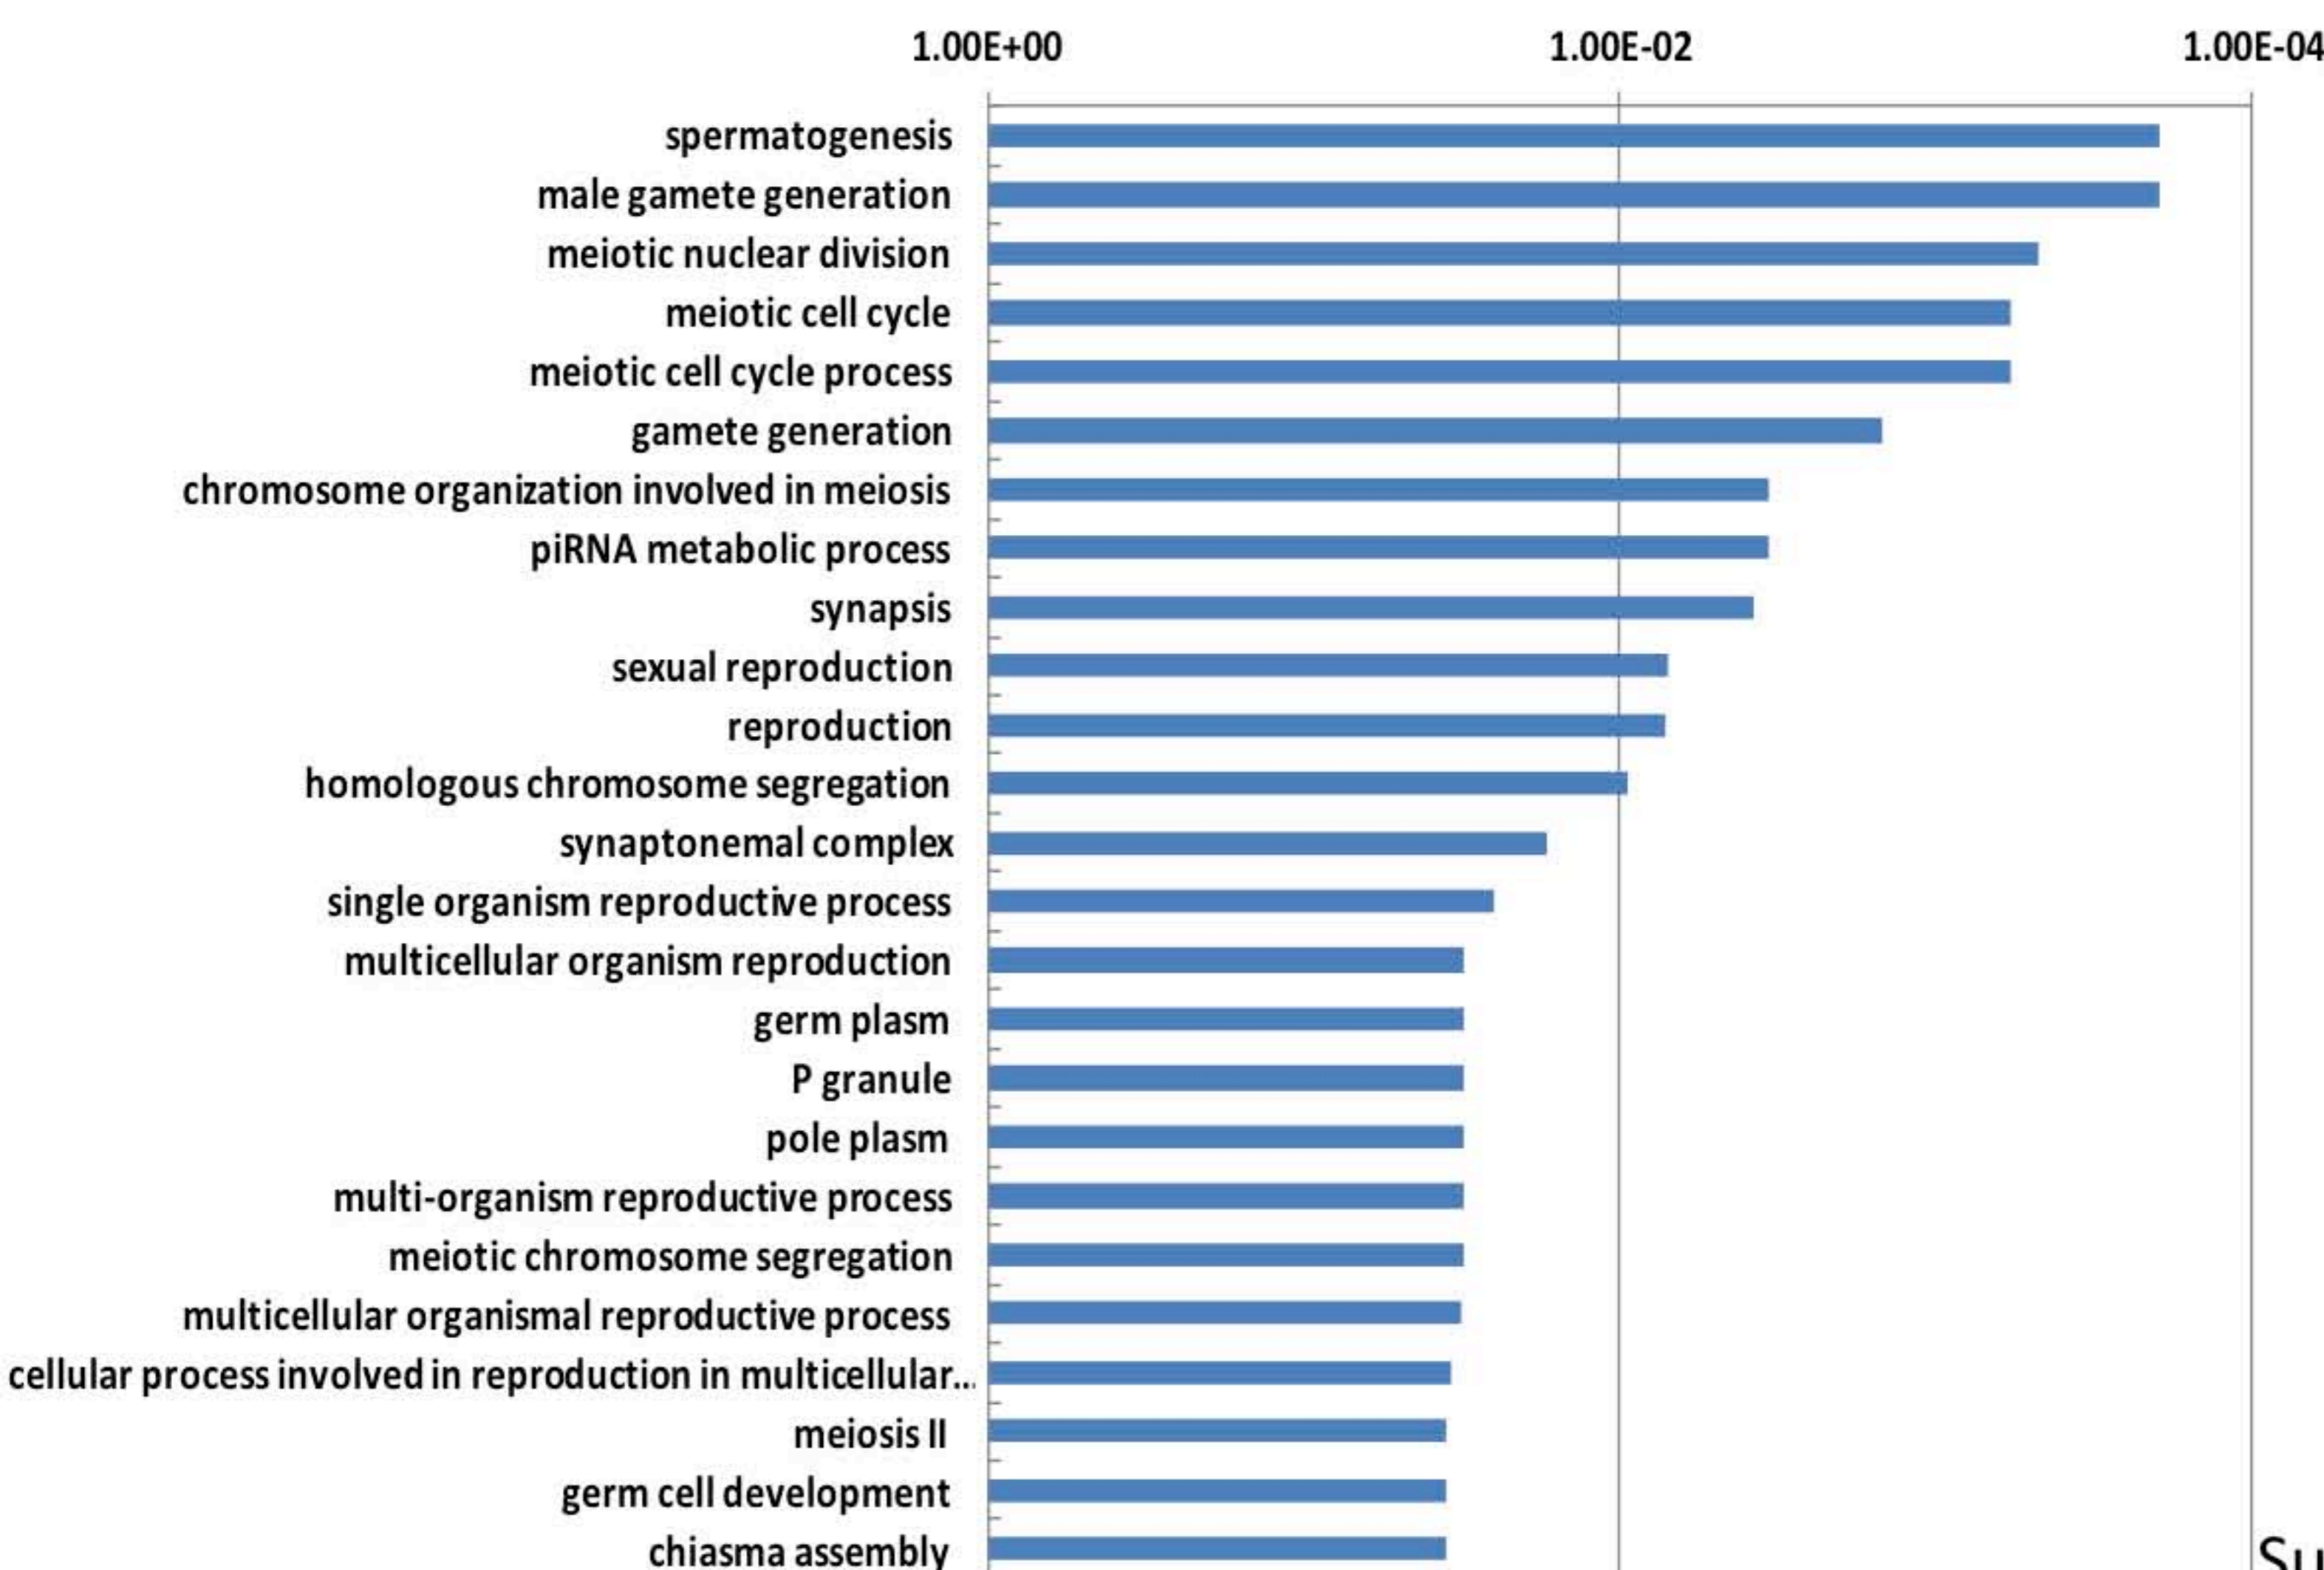

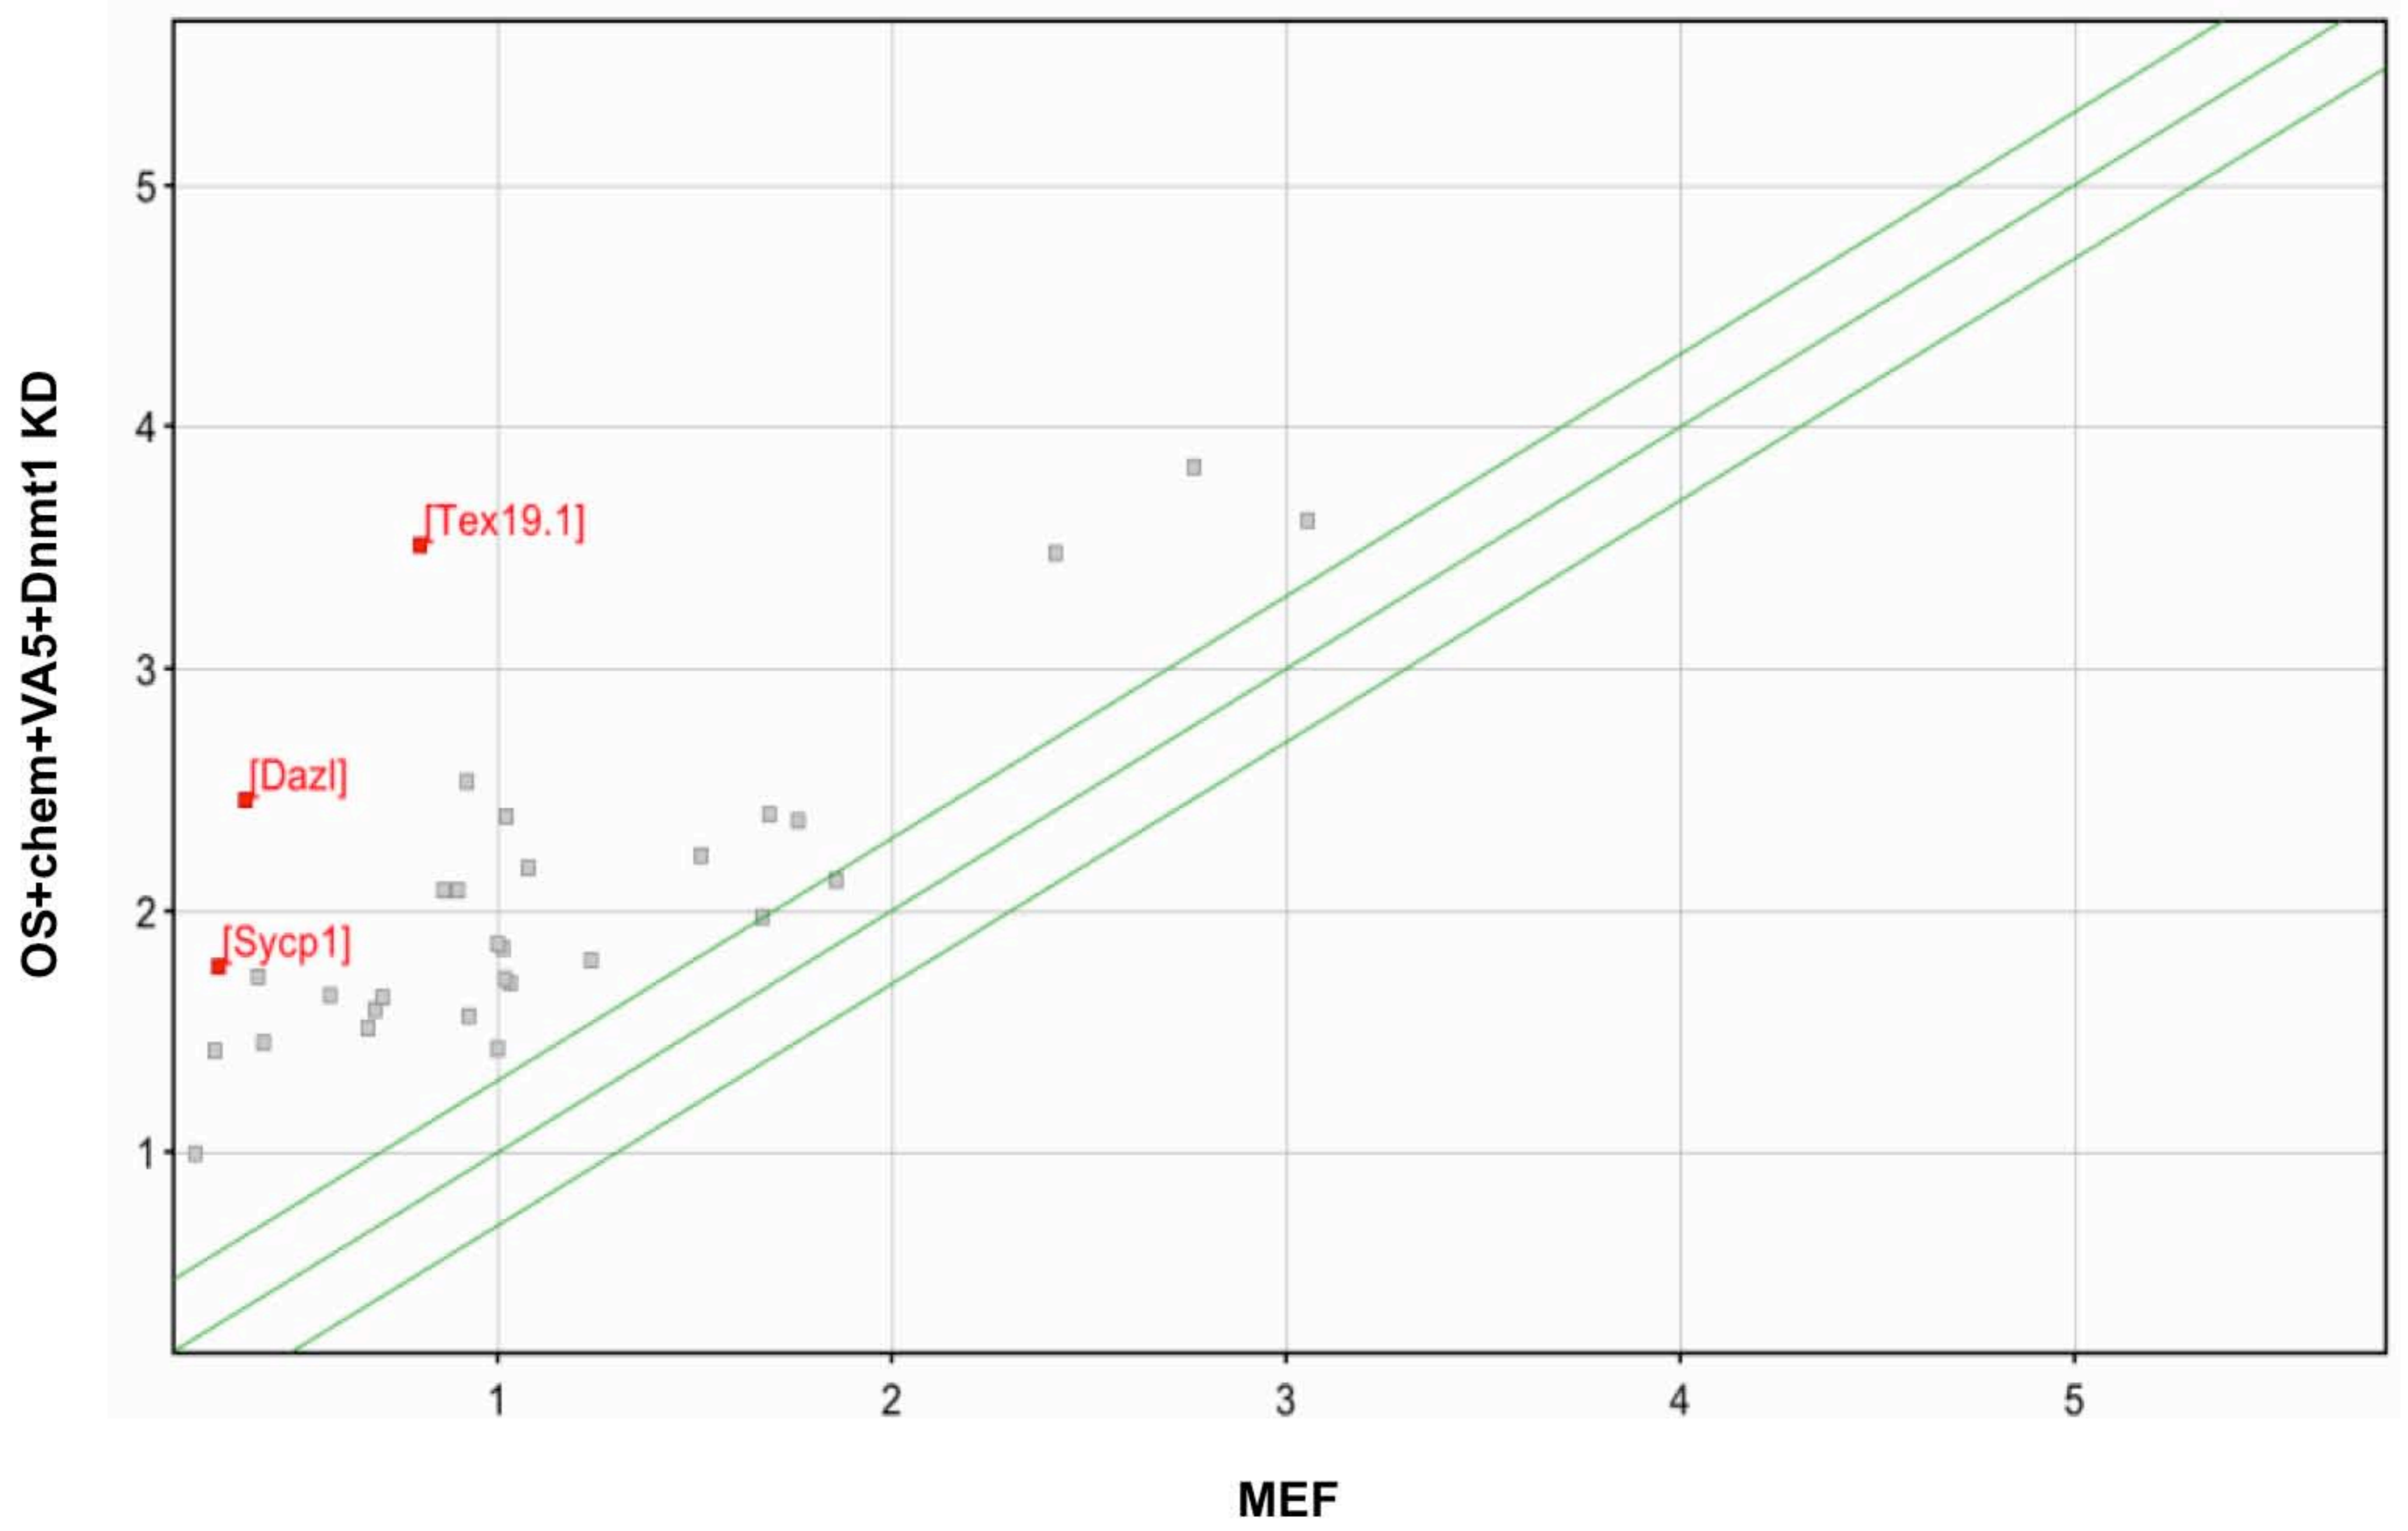

**a**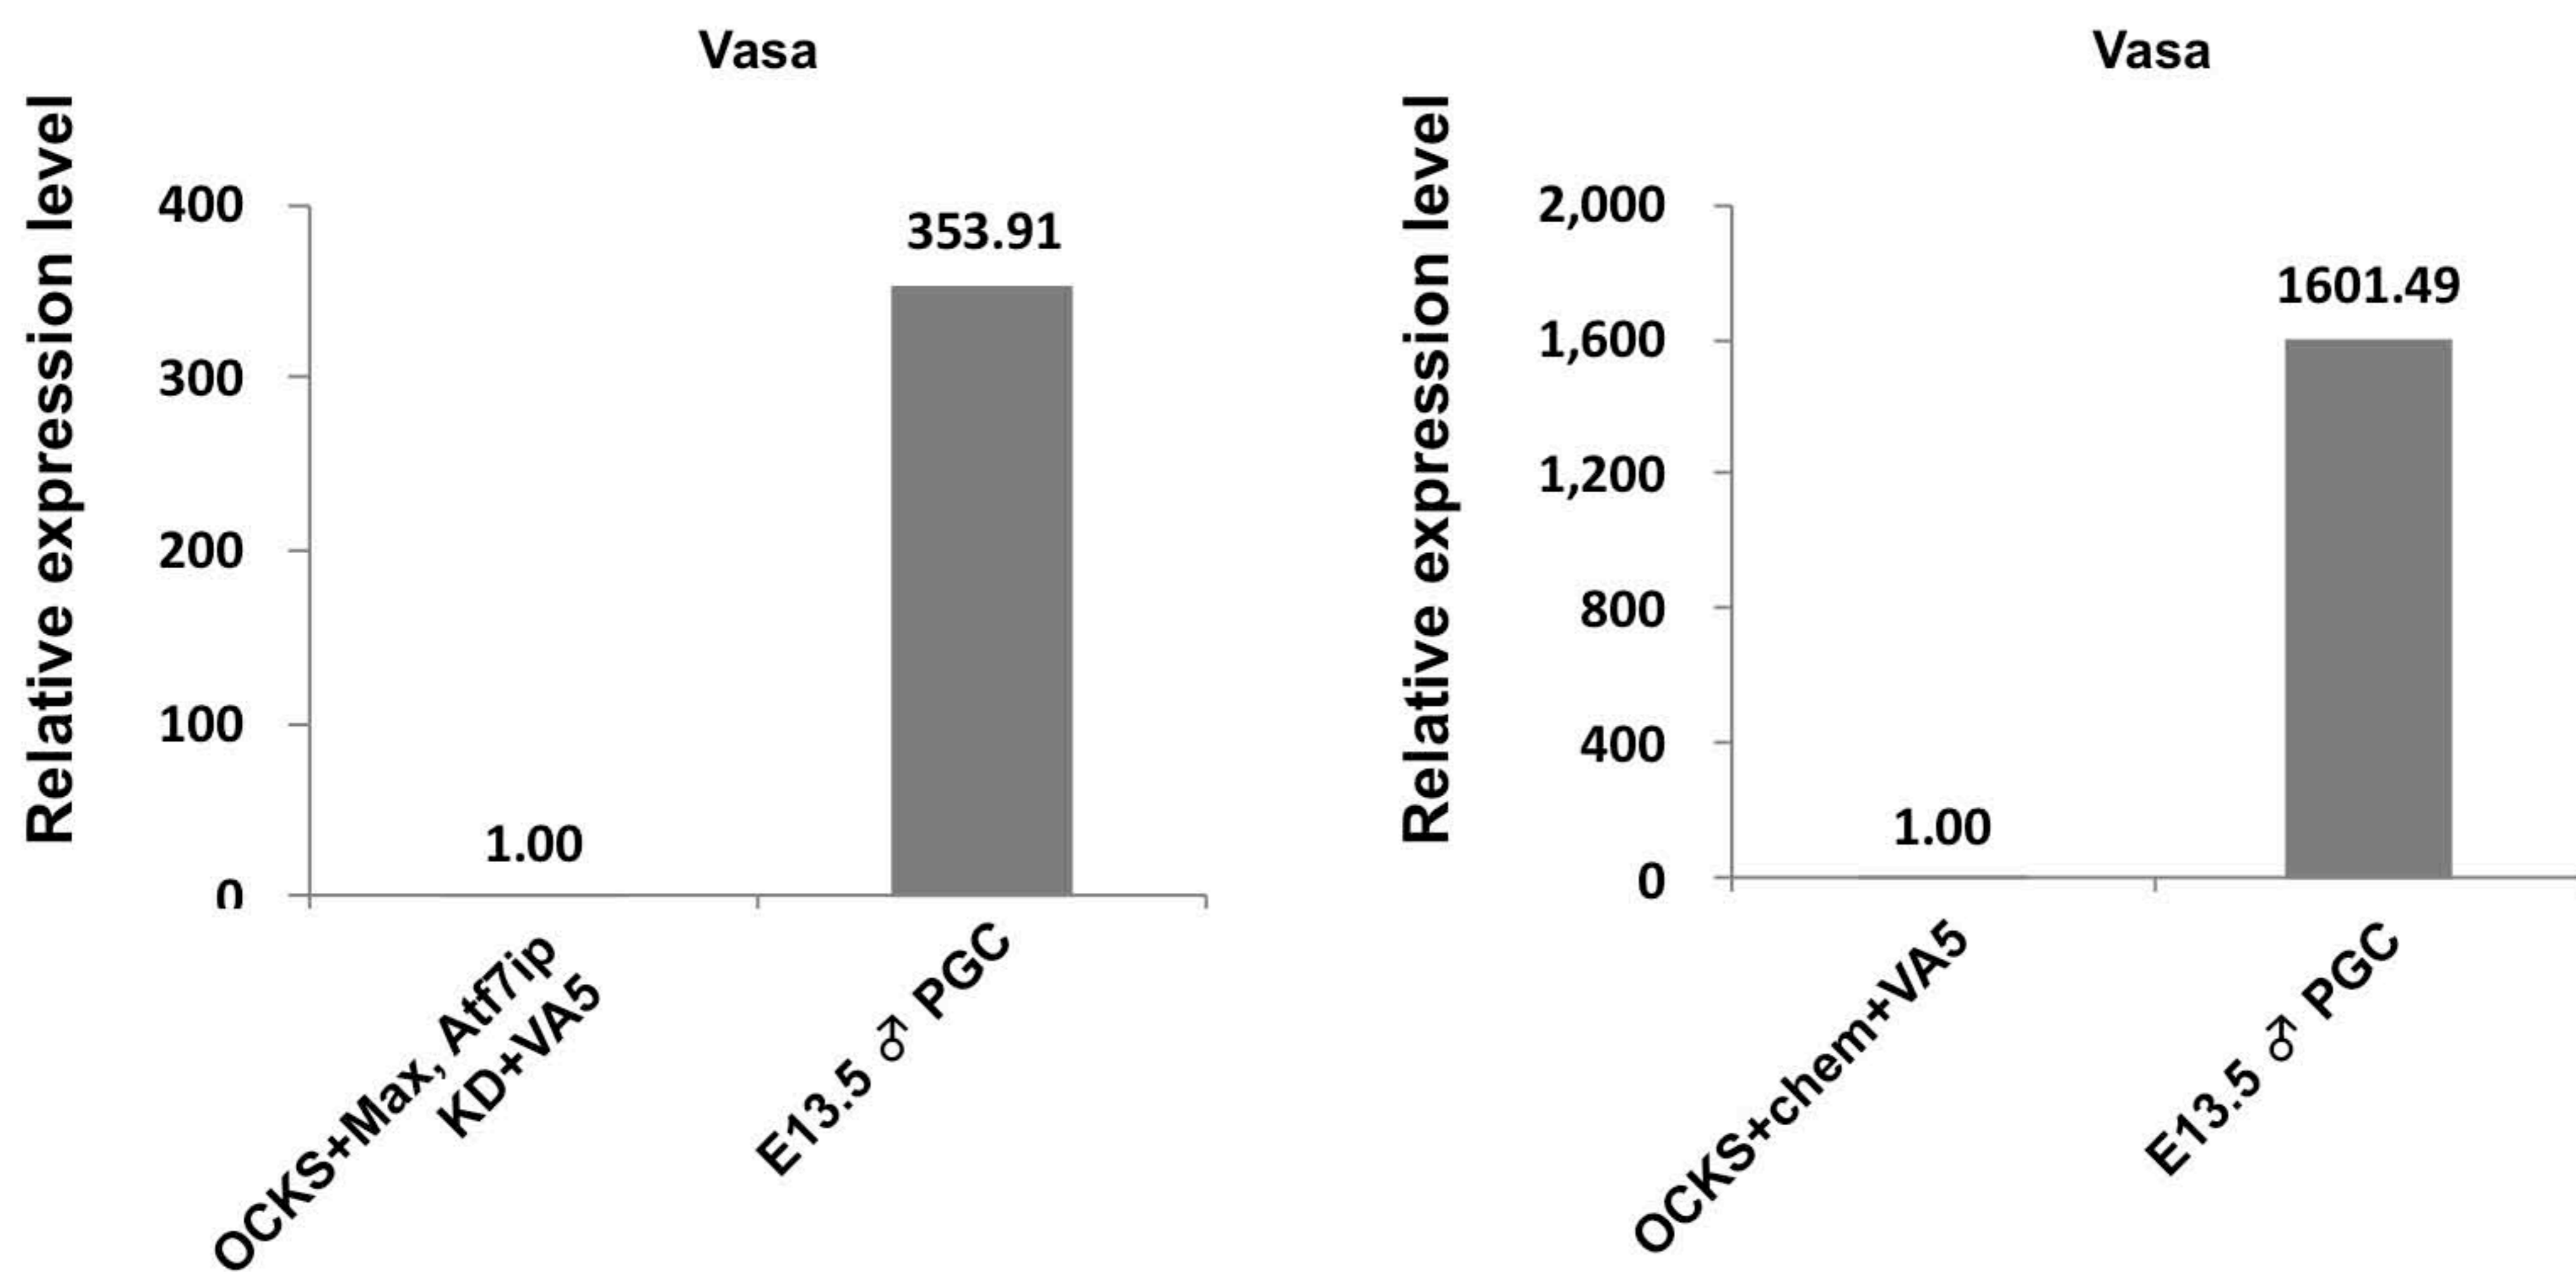**b**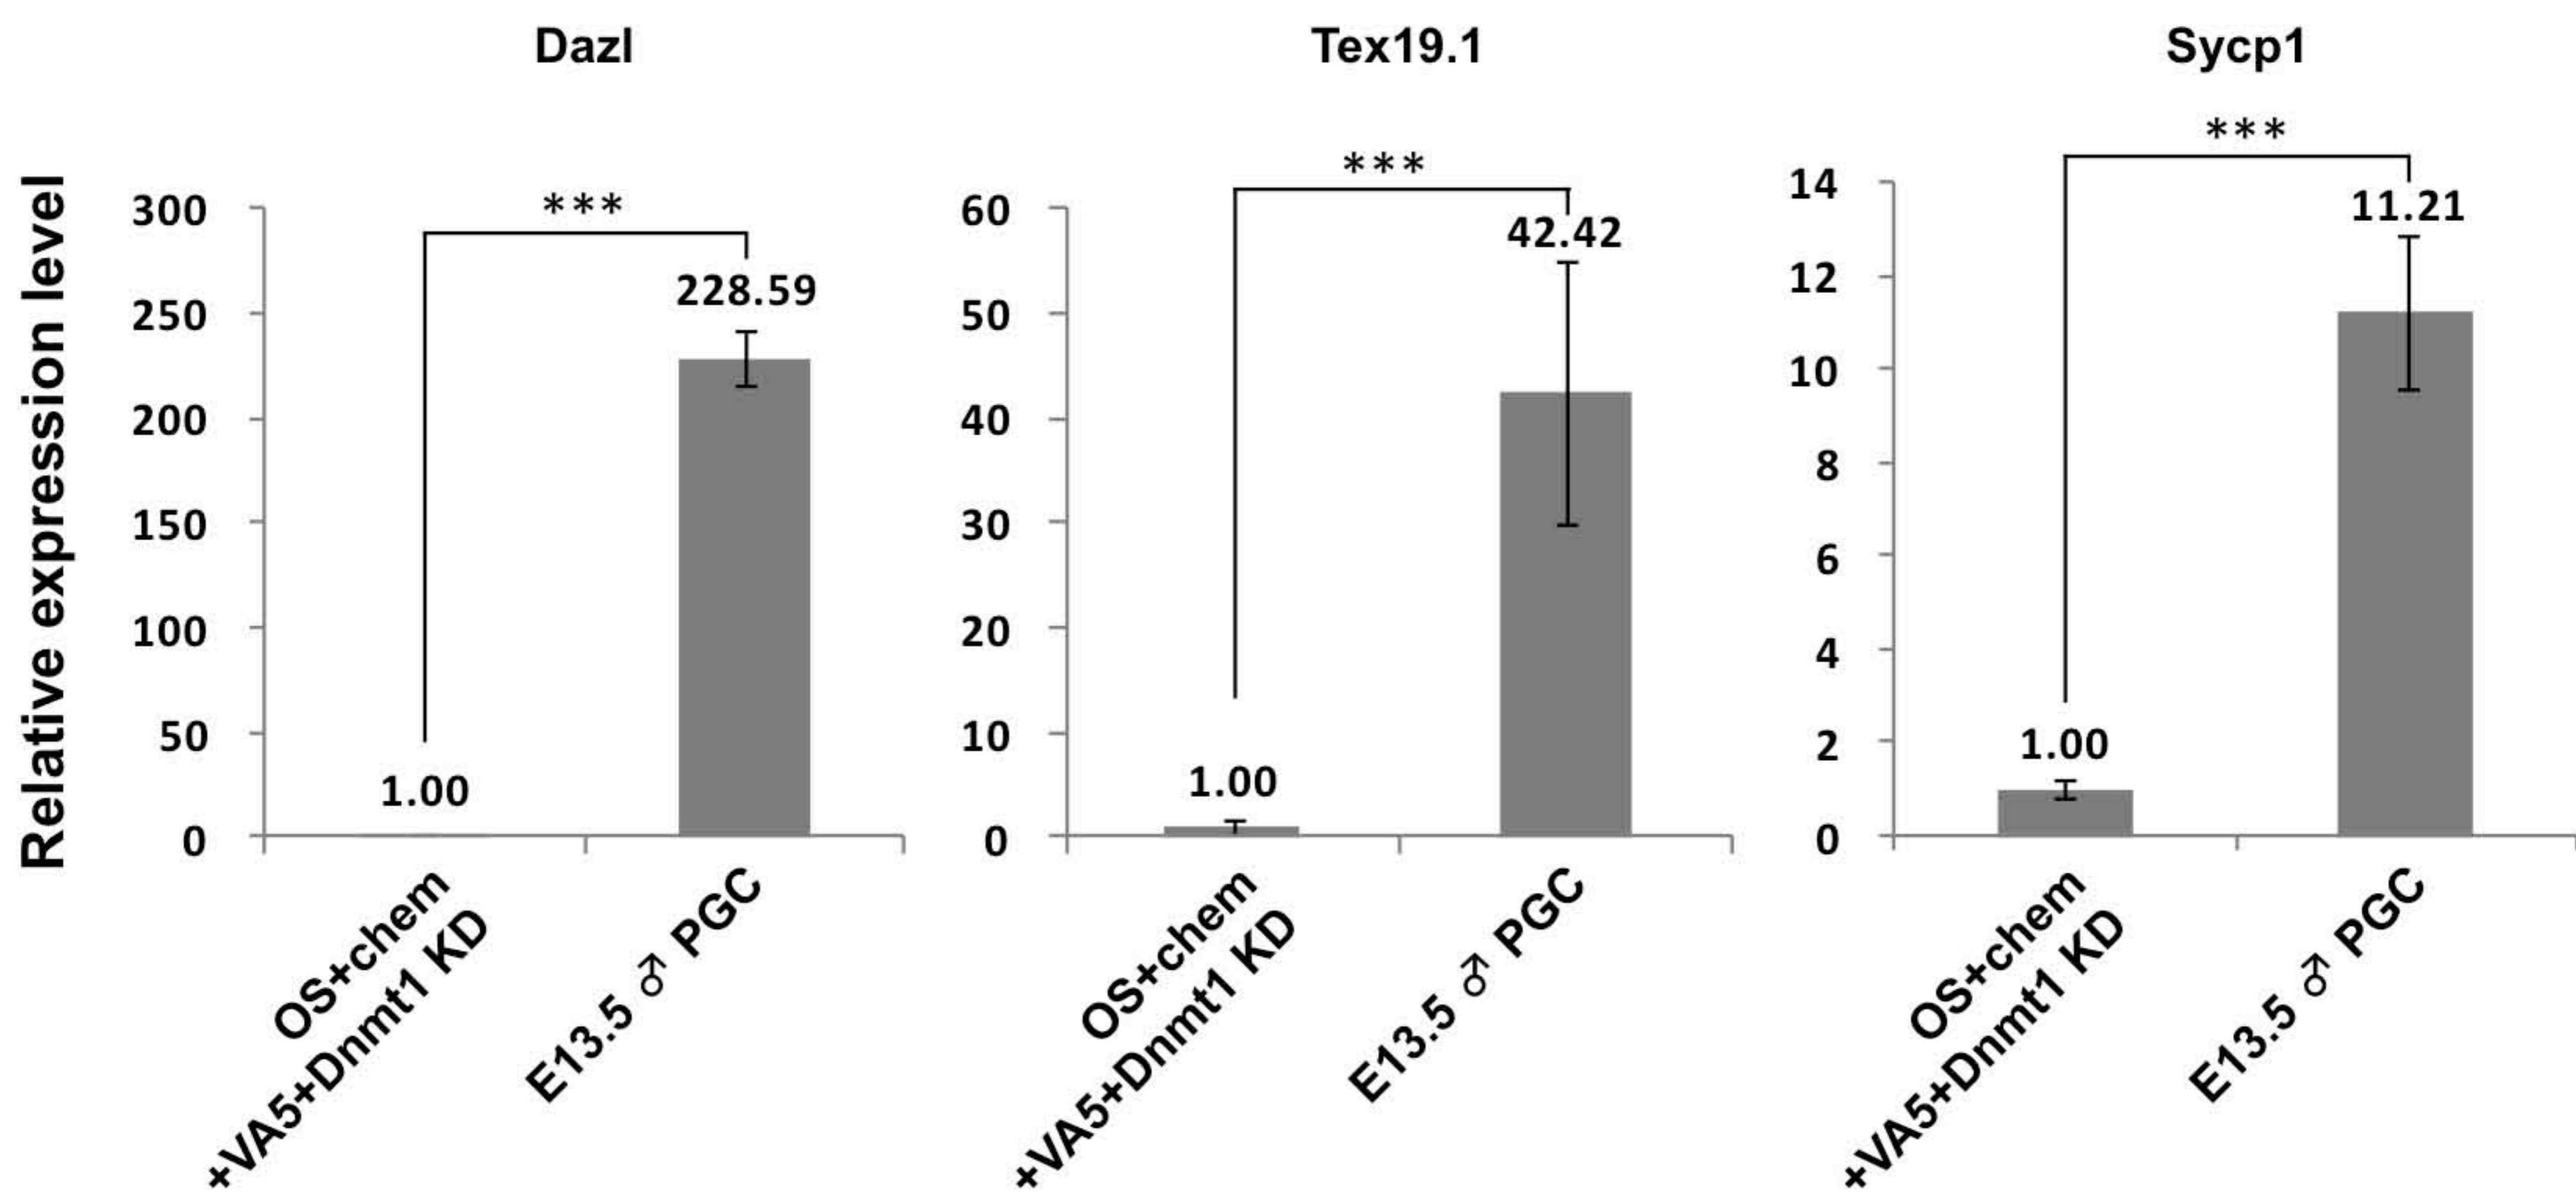



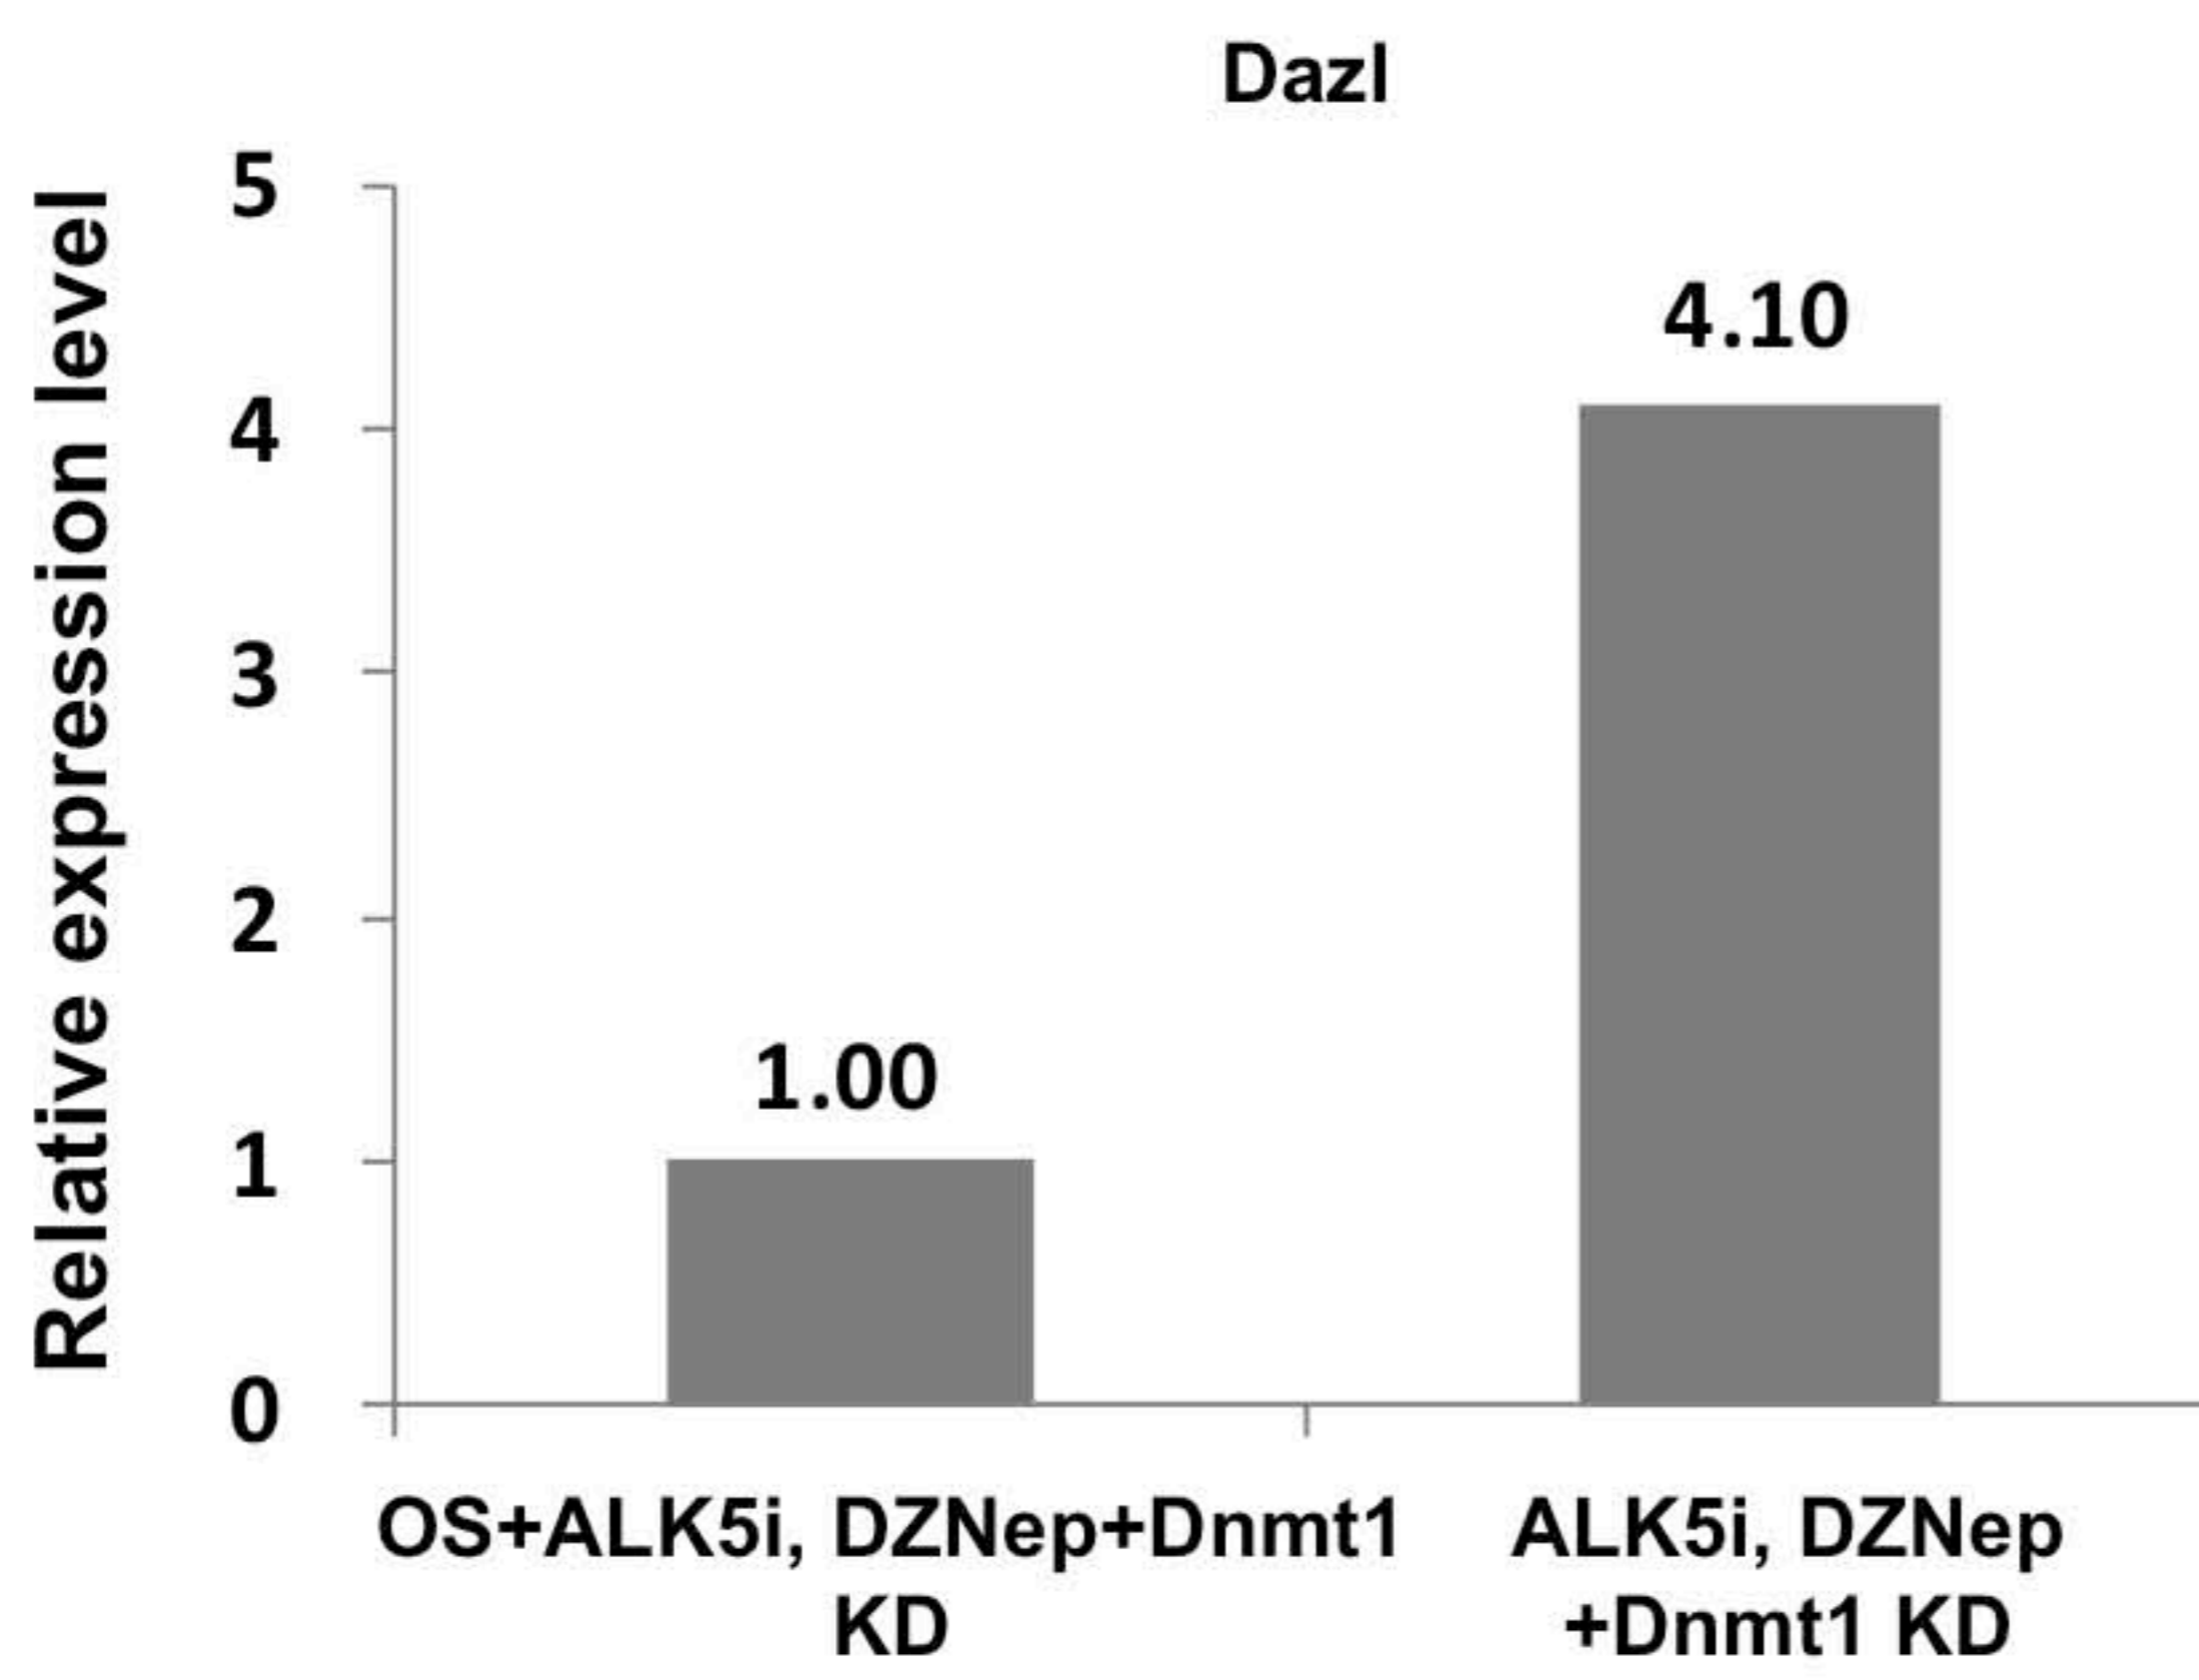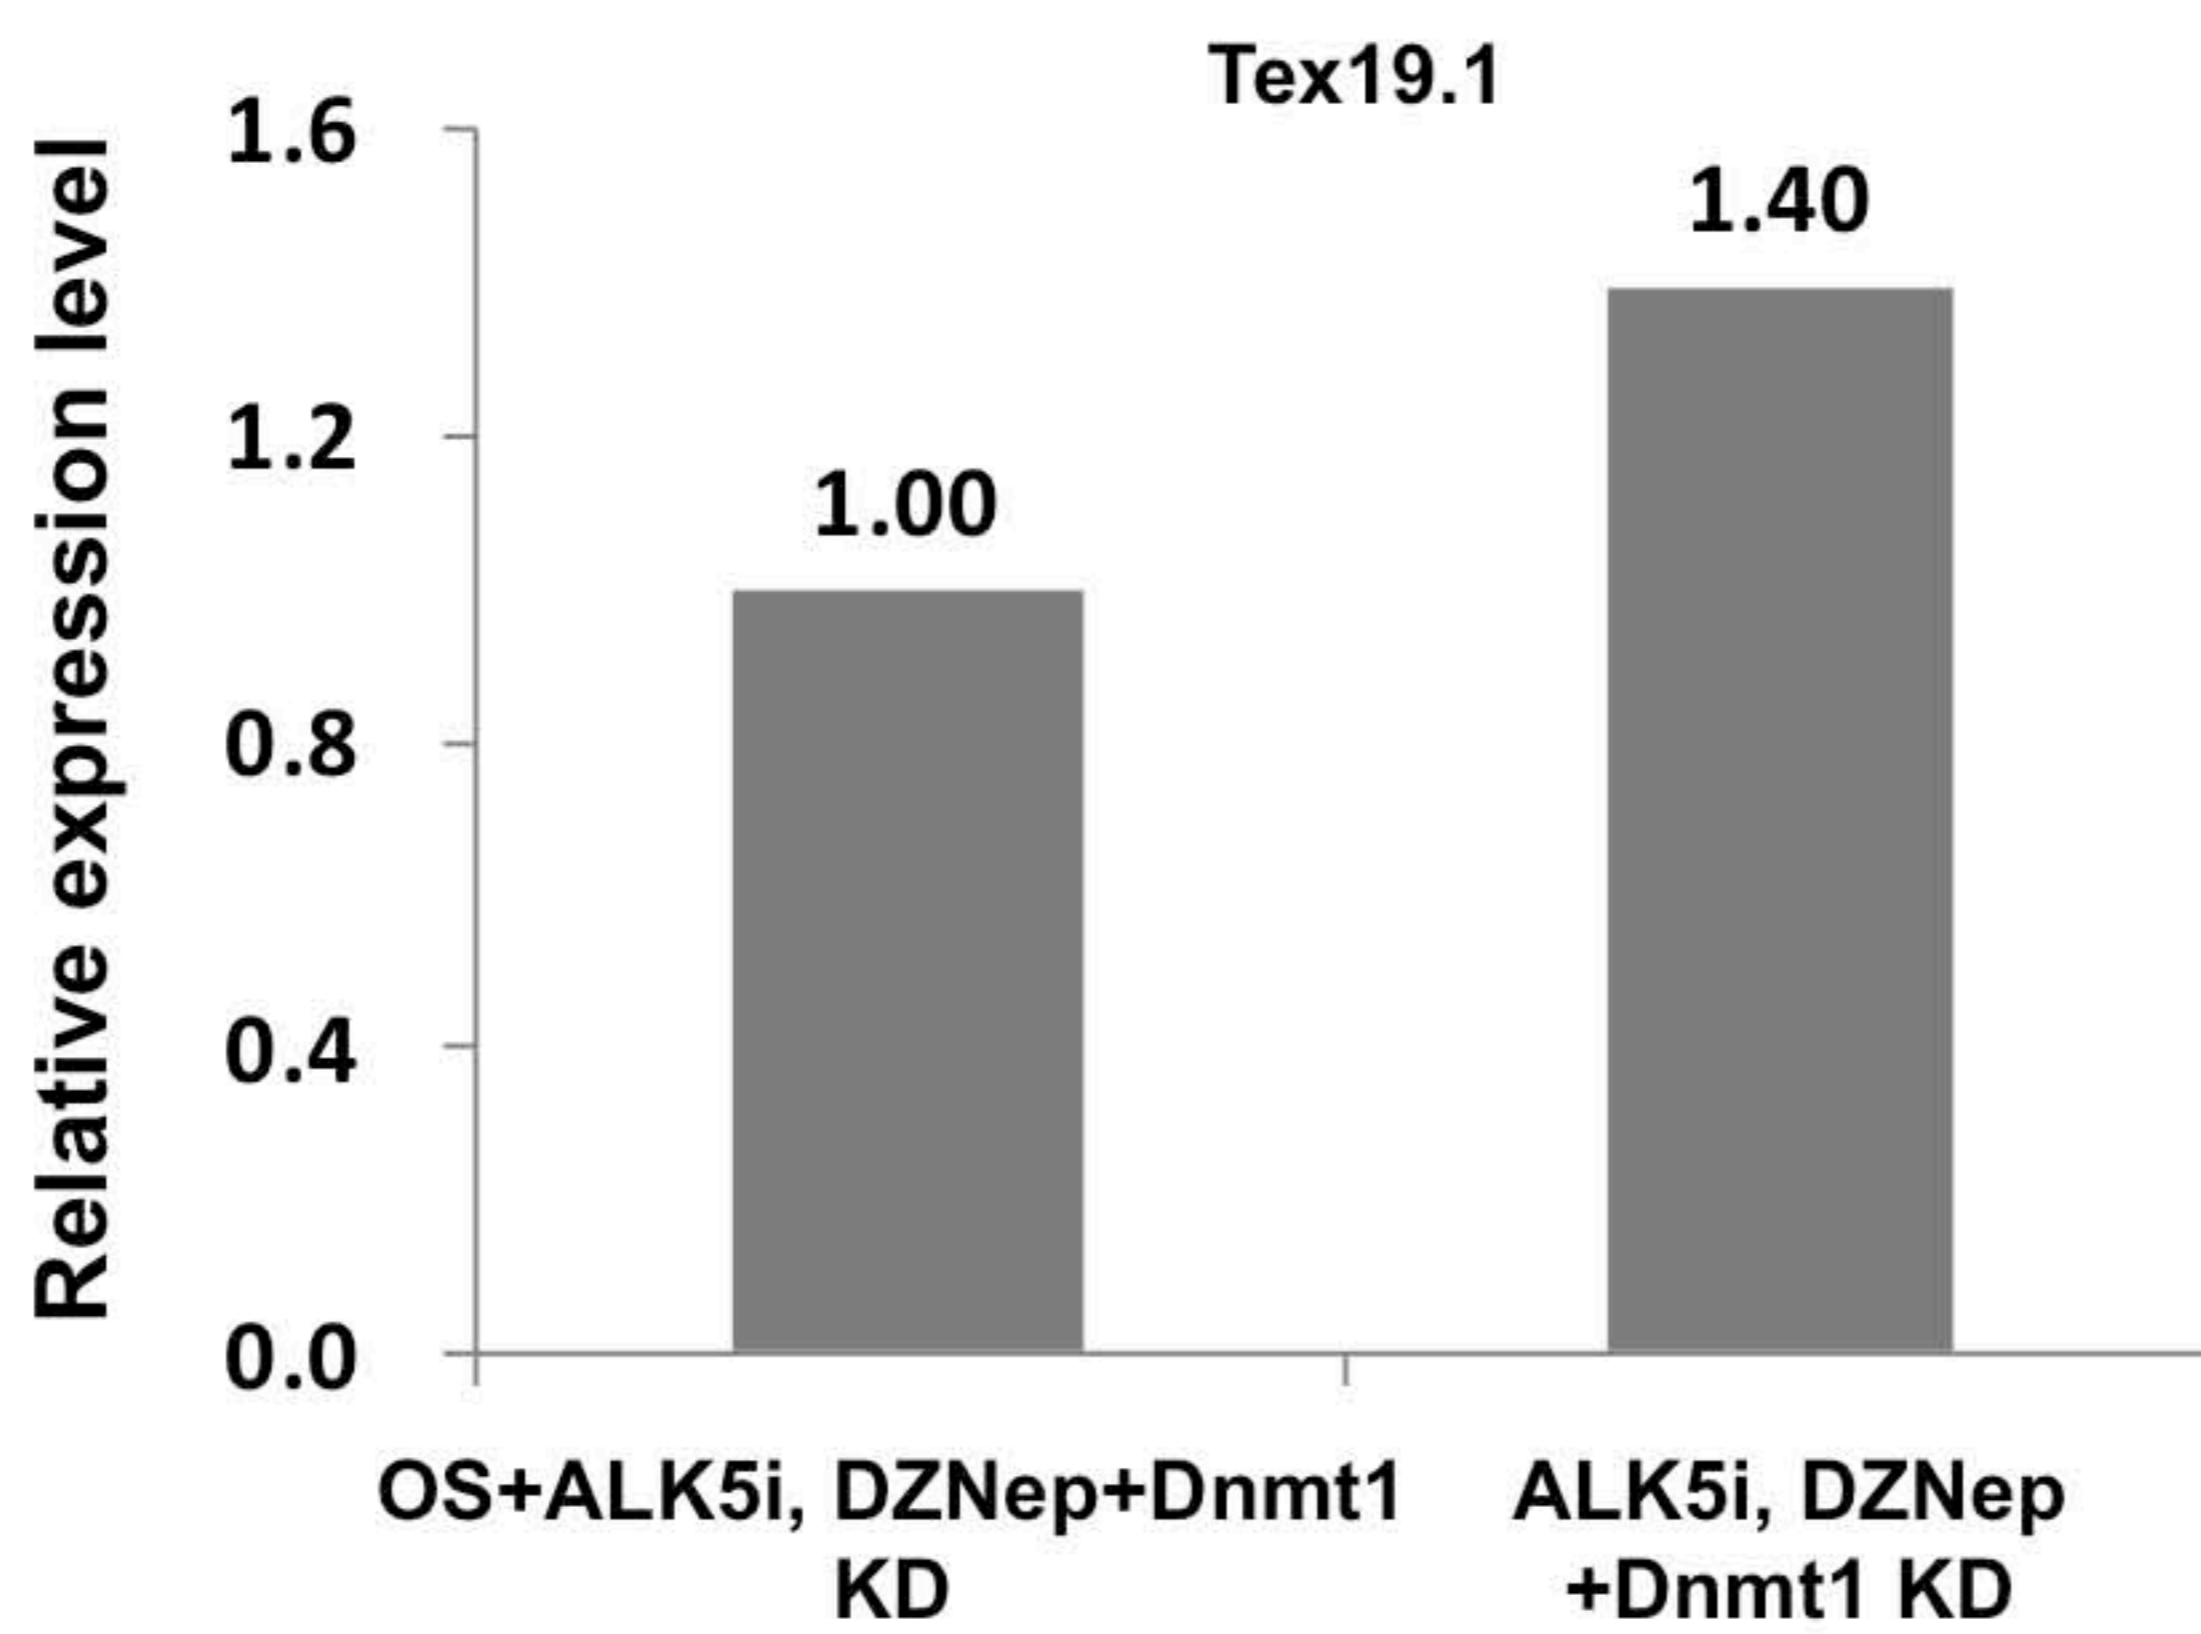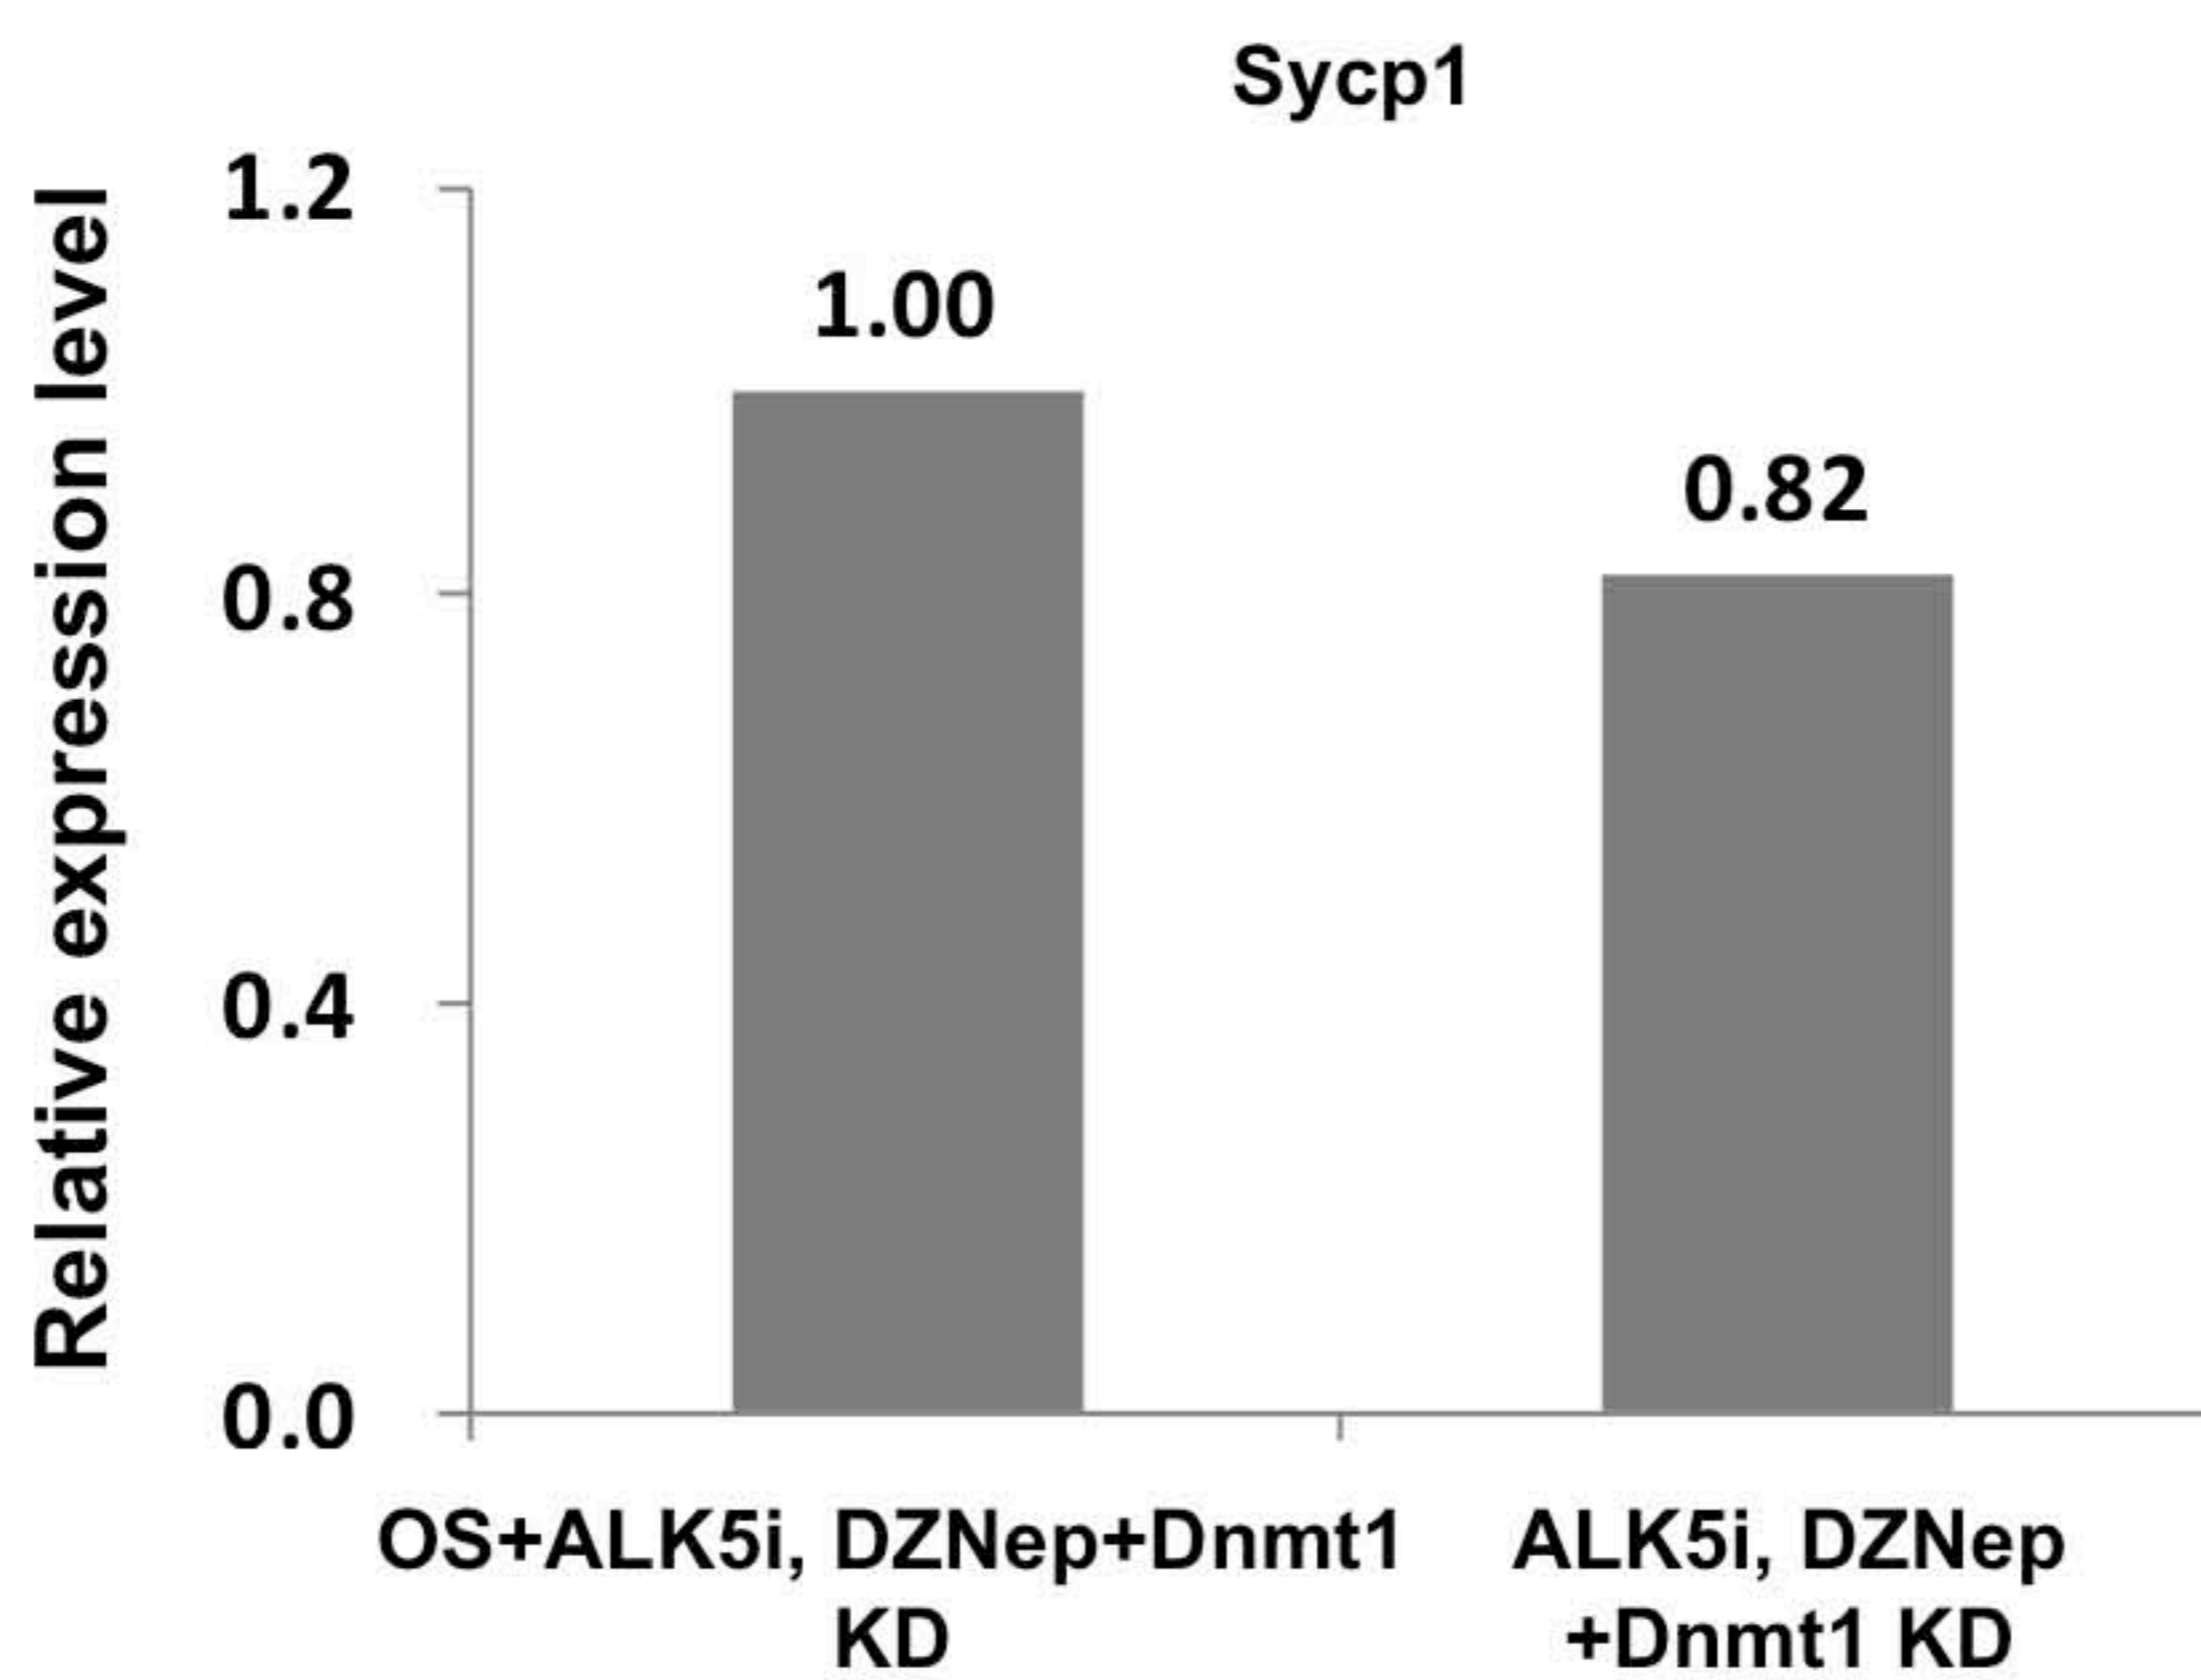

### Dazl\_TSS

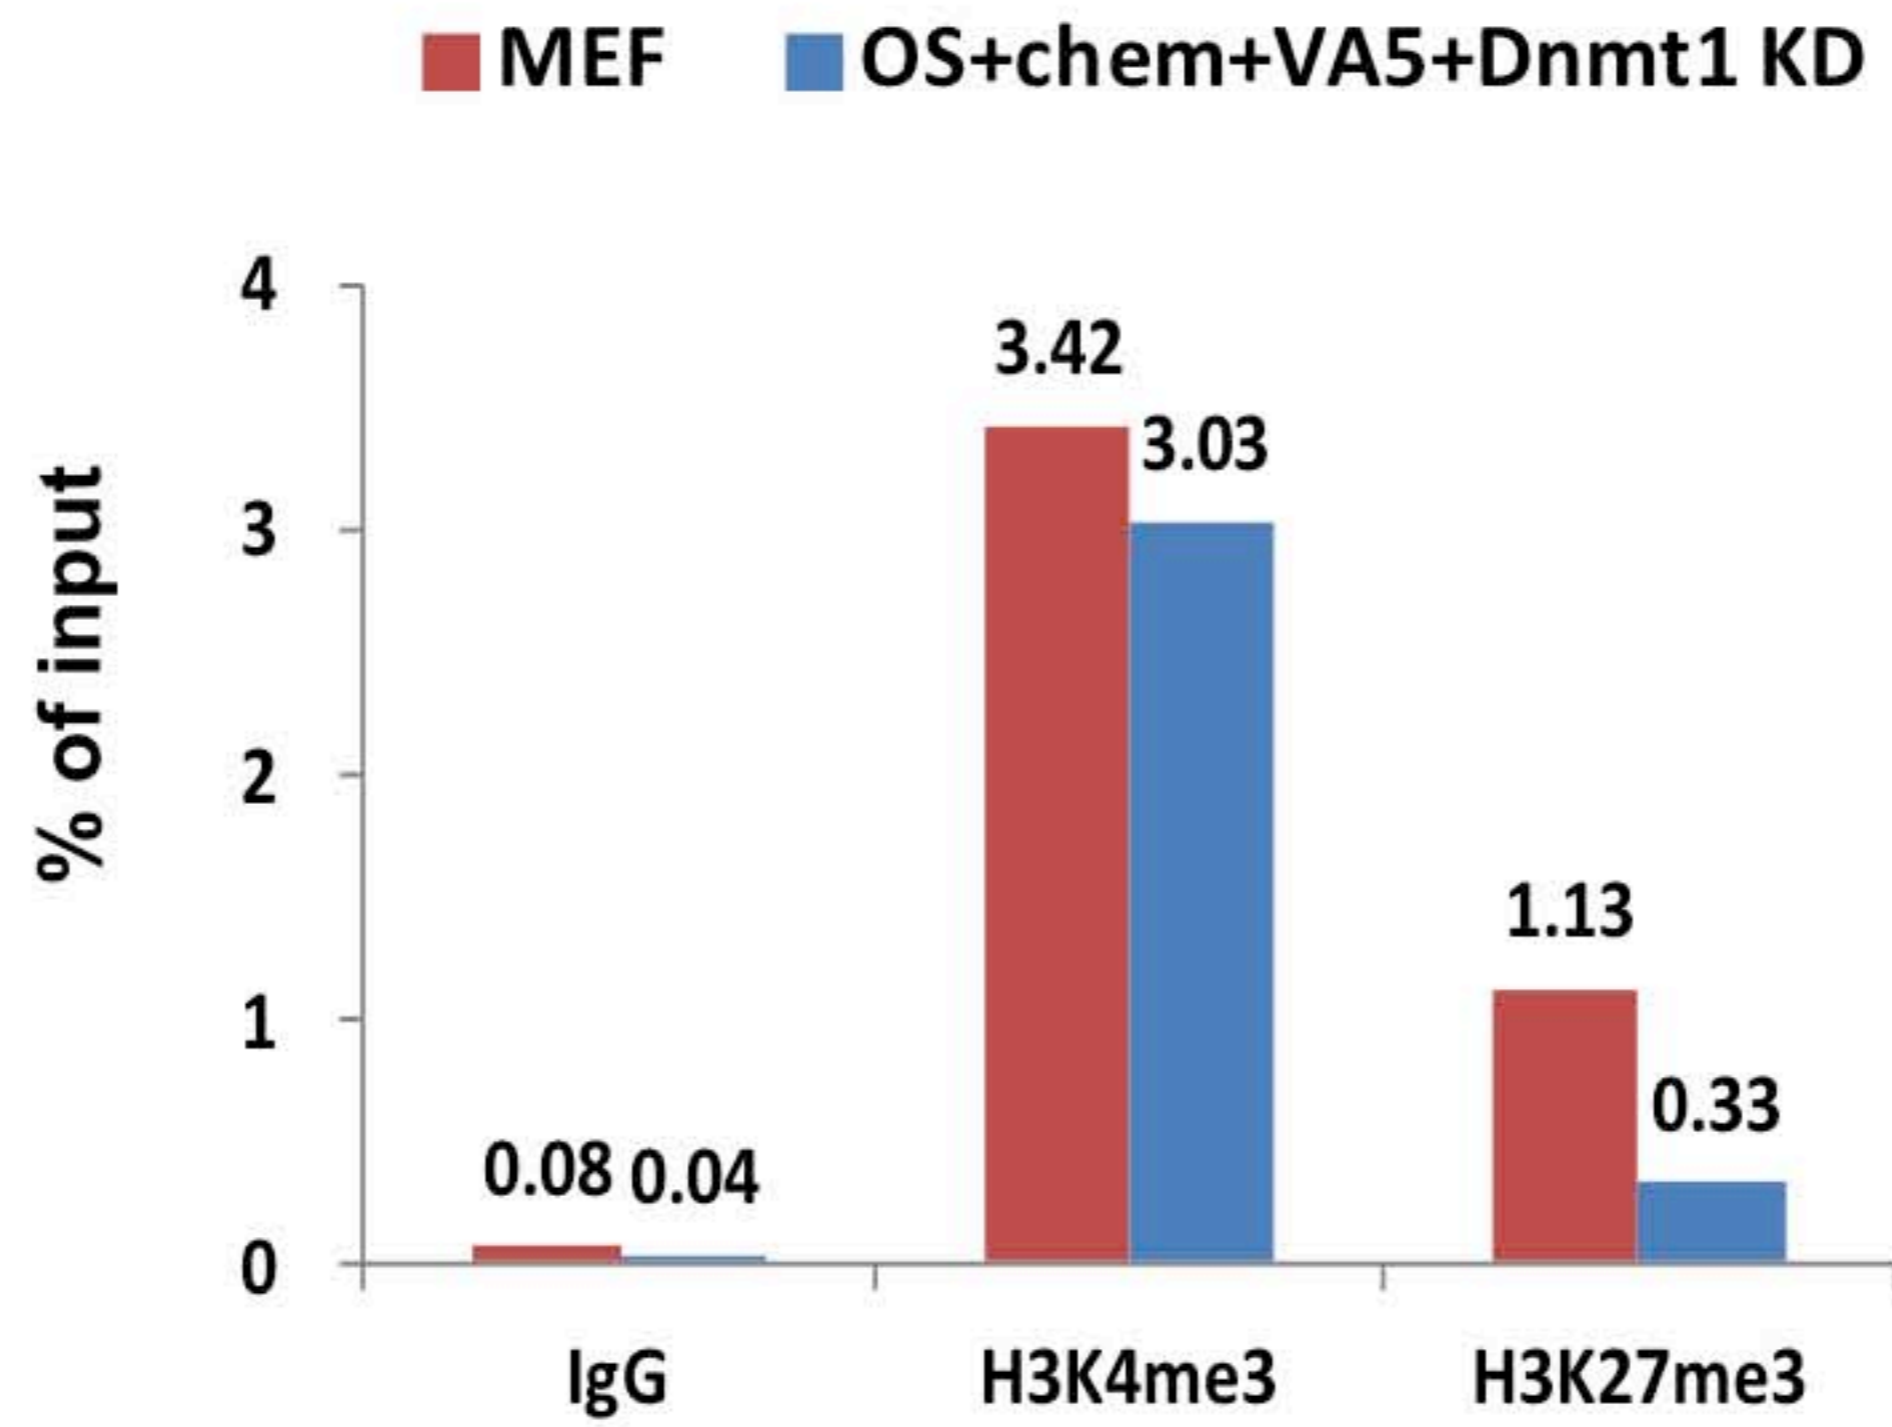

### Tex19.1\_TSS

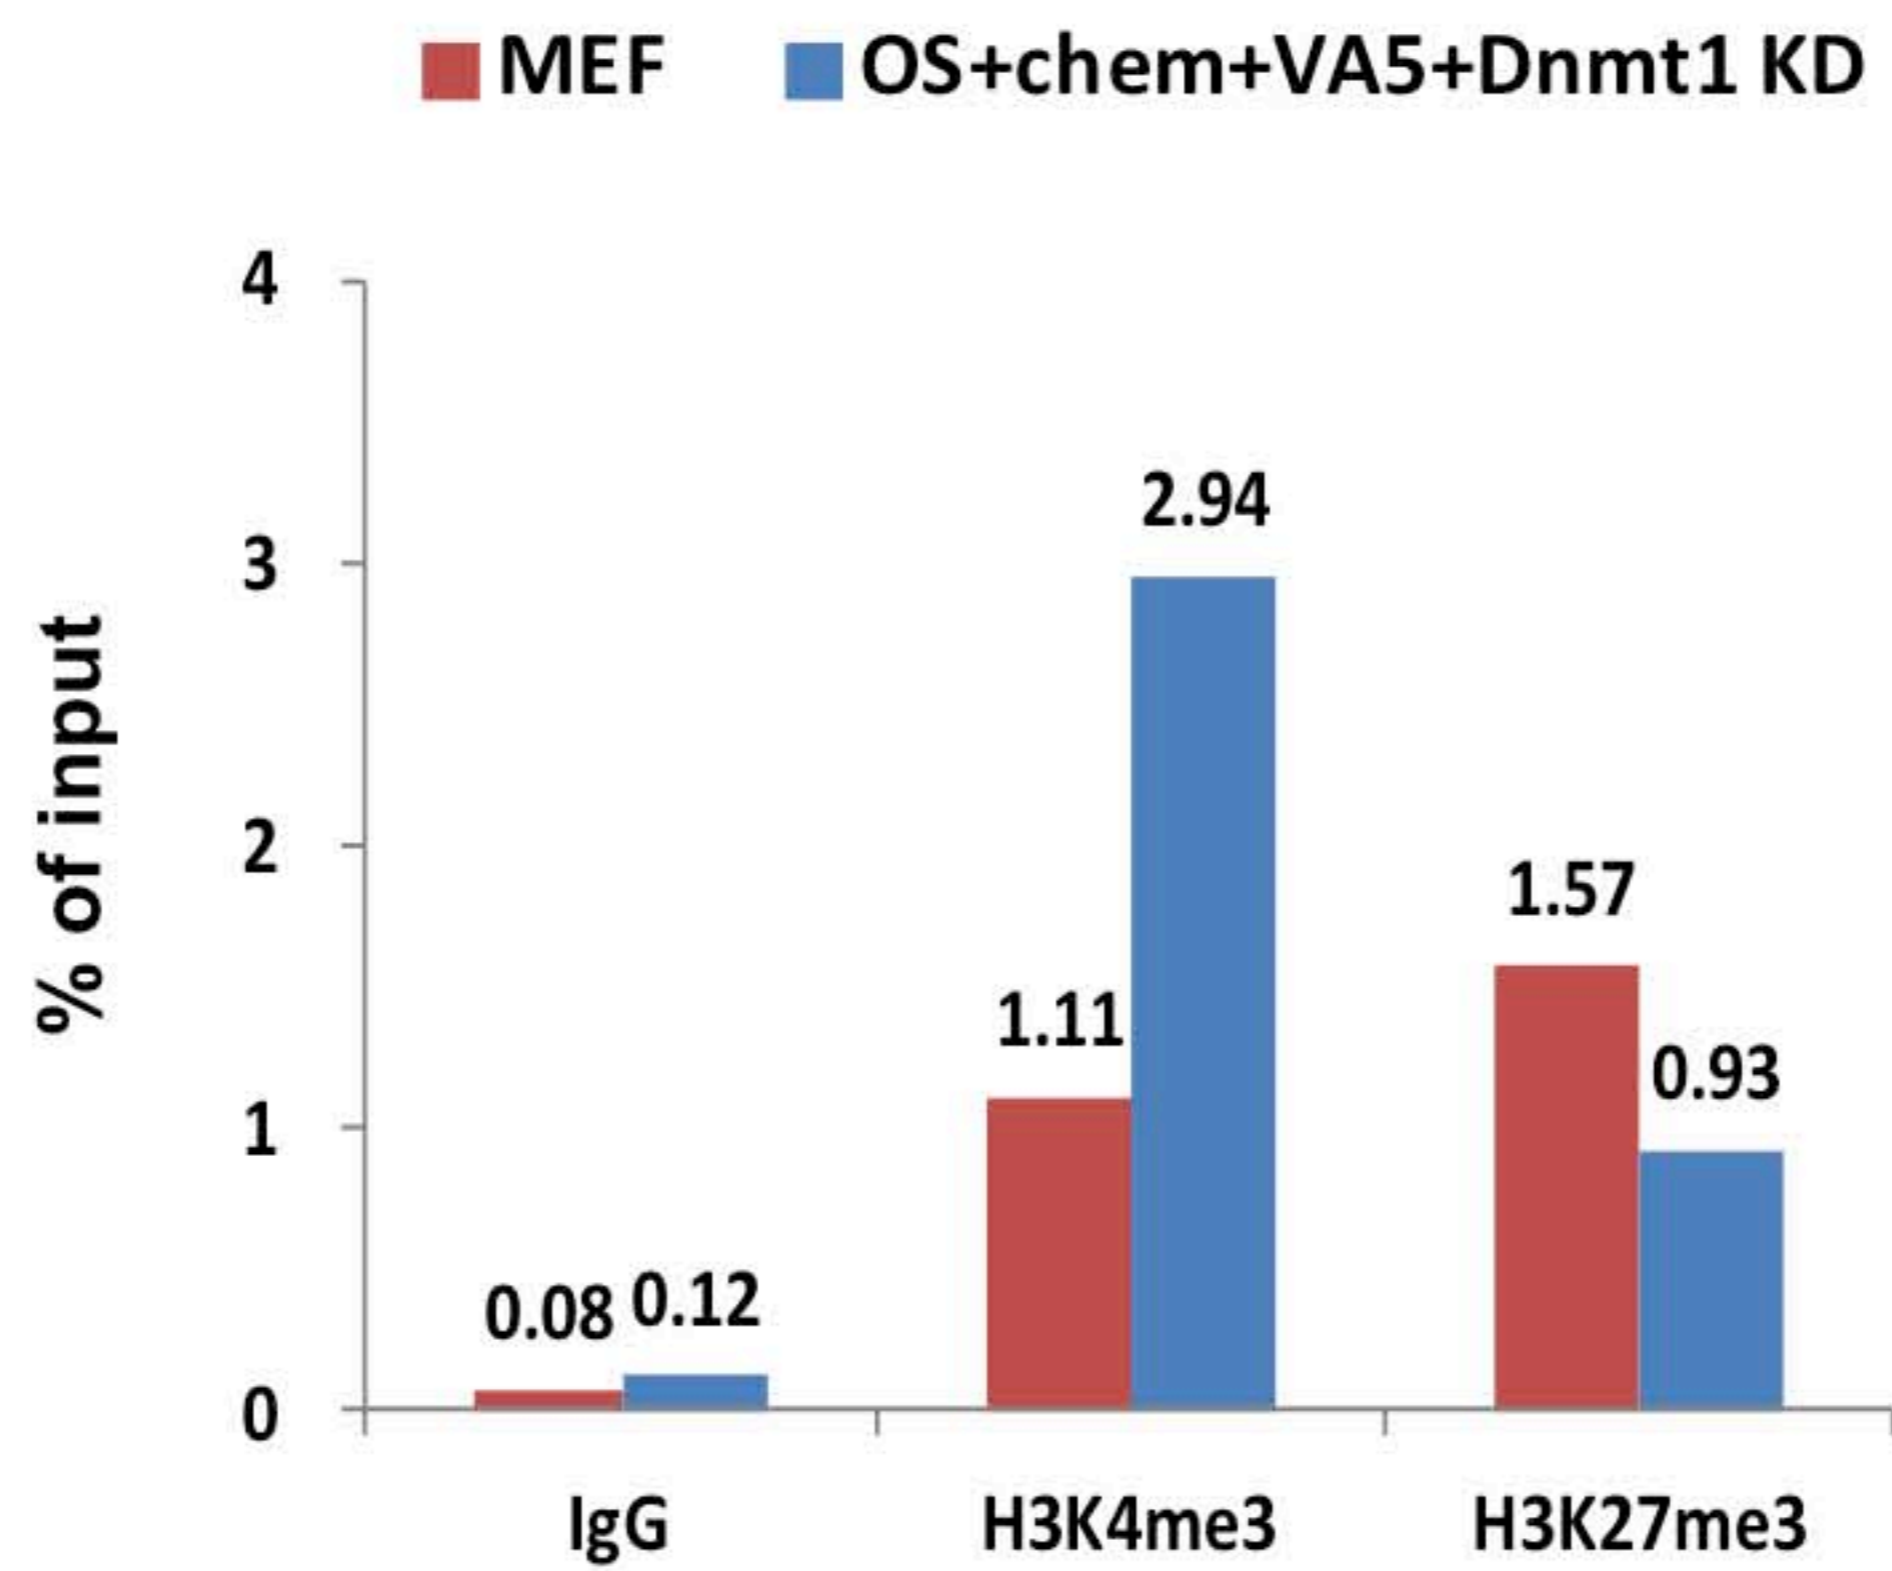

### Sycp1\_TSS

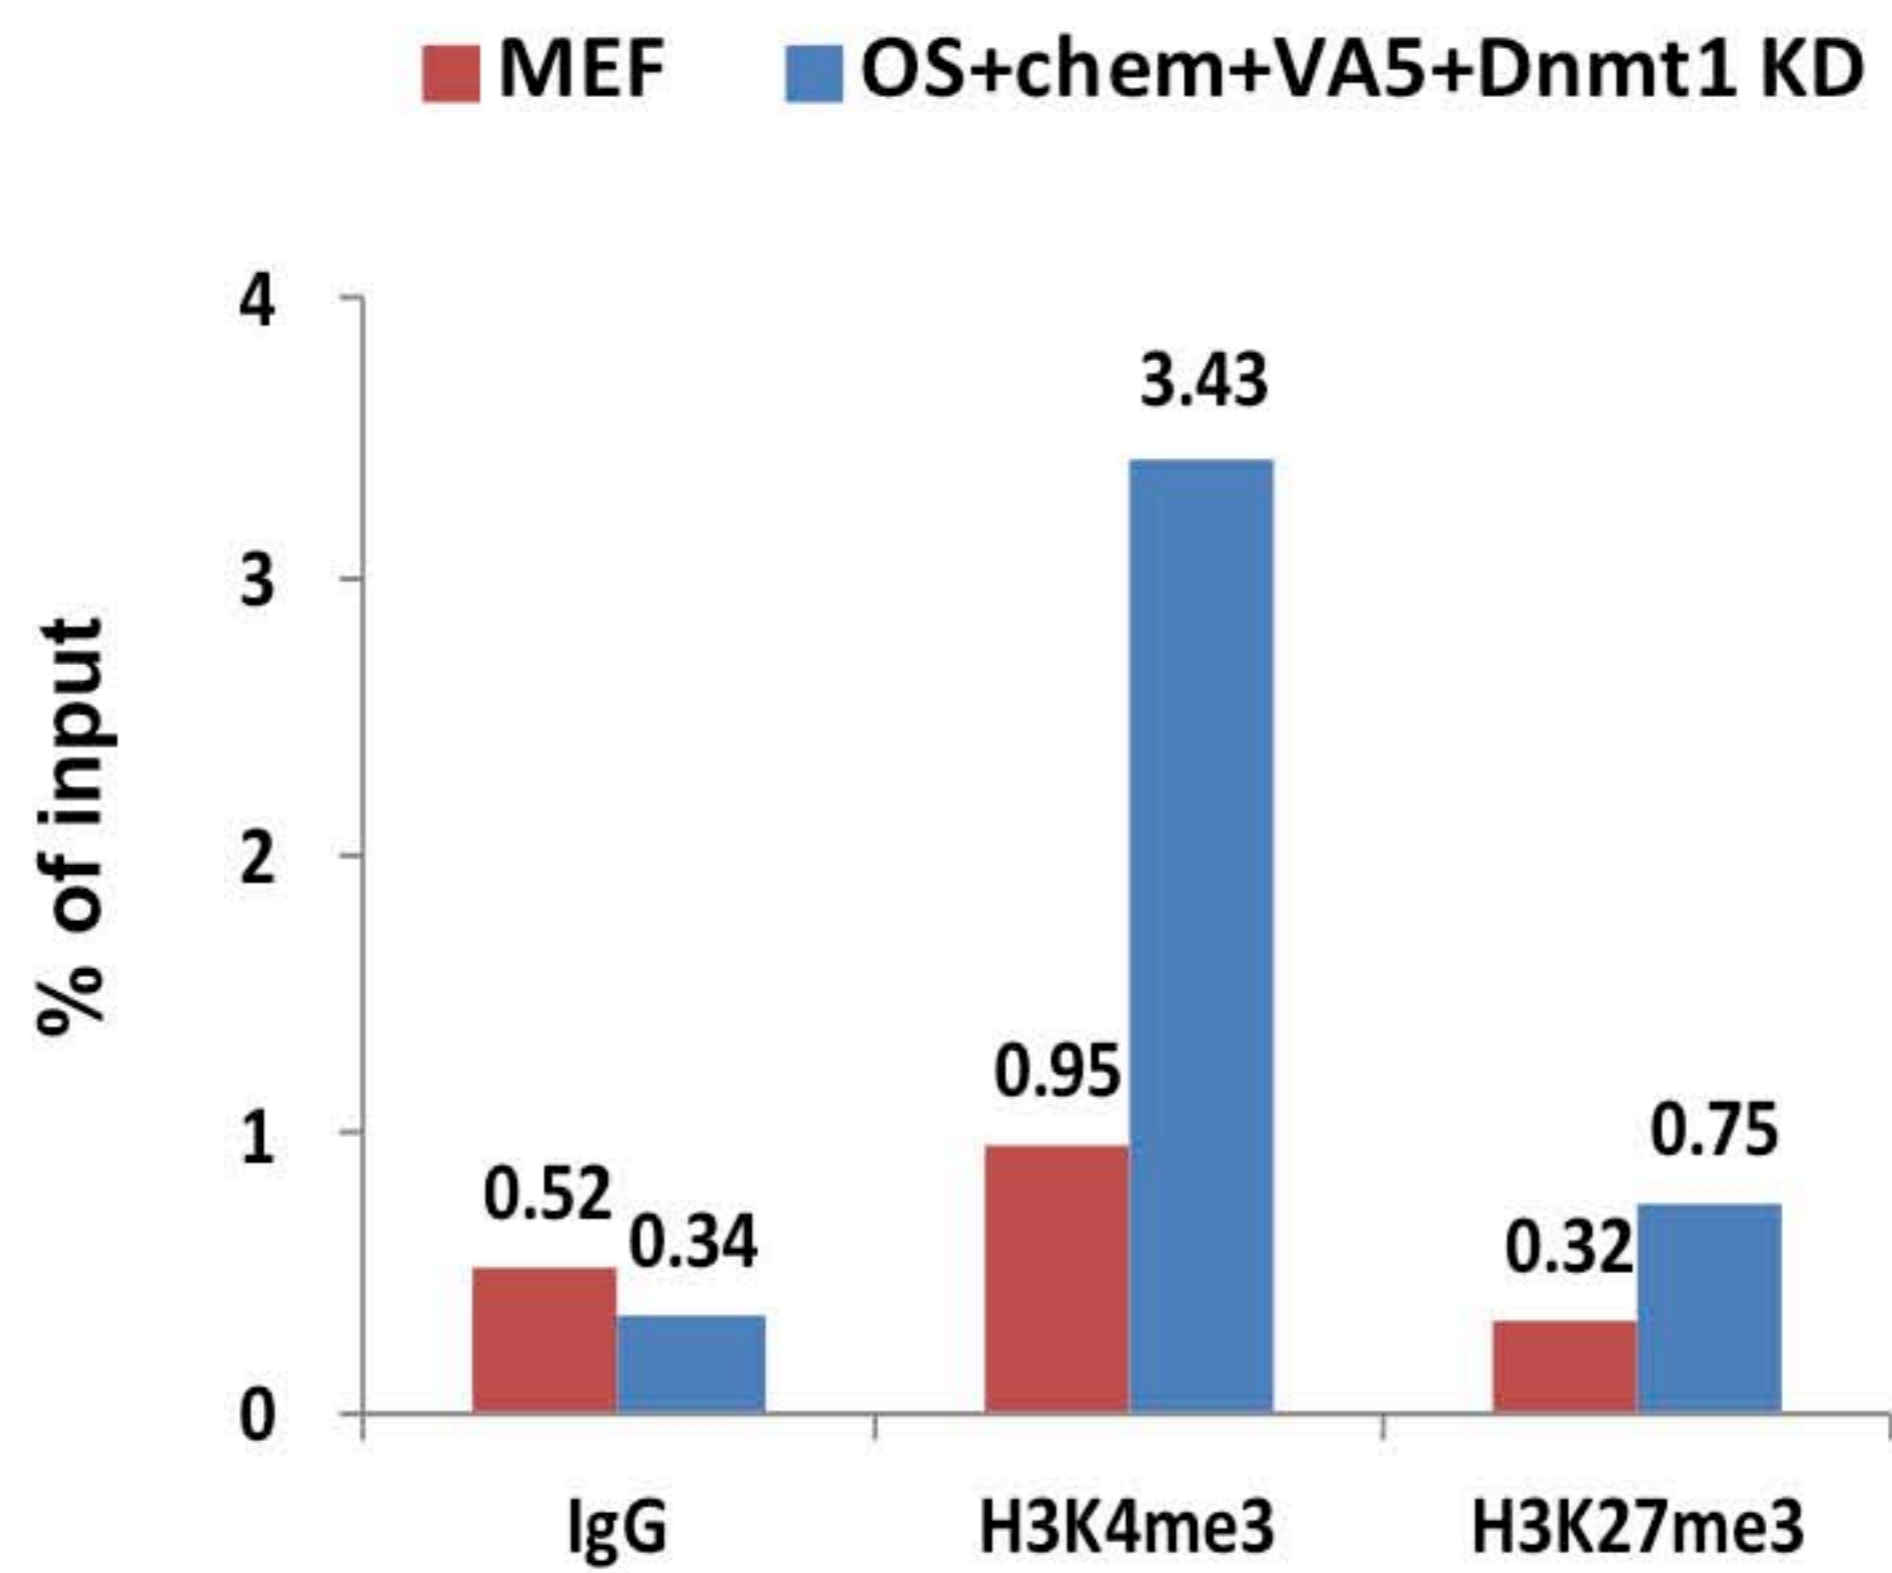

Vasa::RFP

VASA

DAPI

OS+Ctrl siRNA

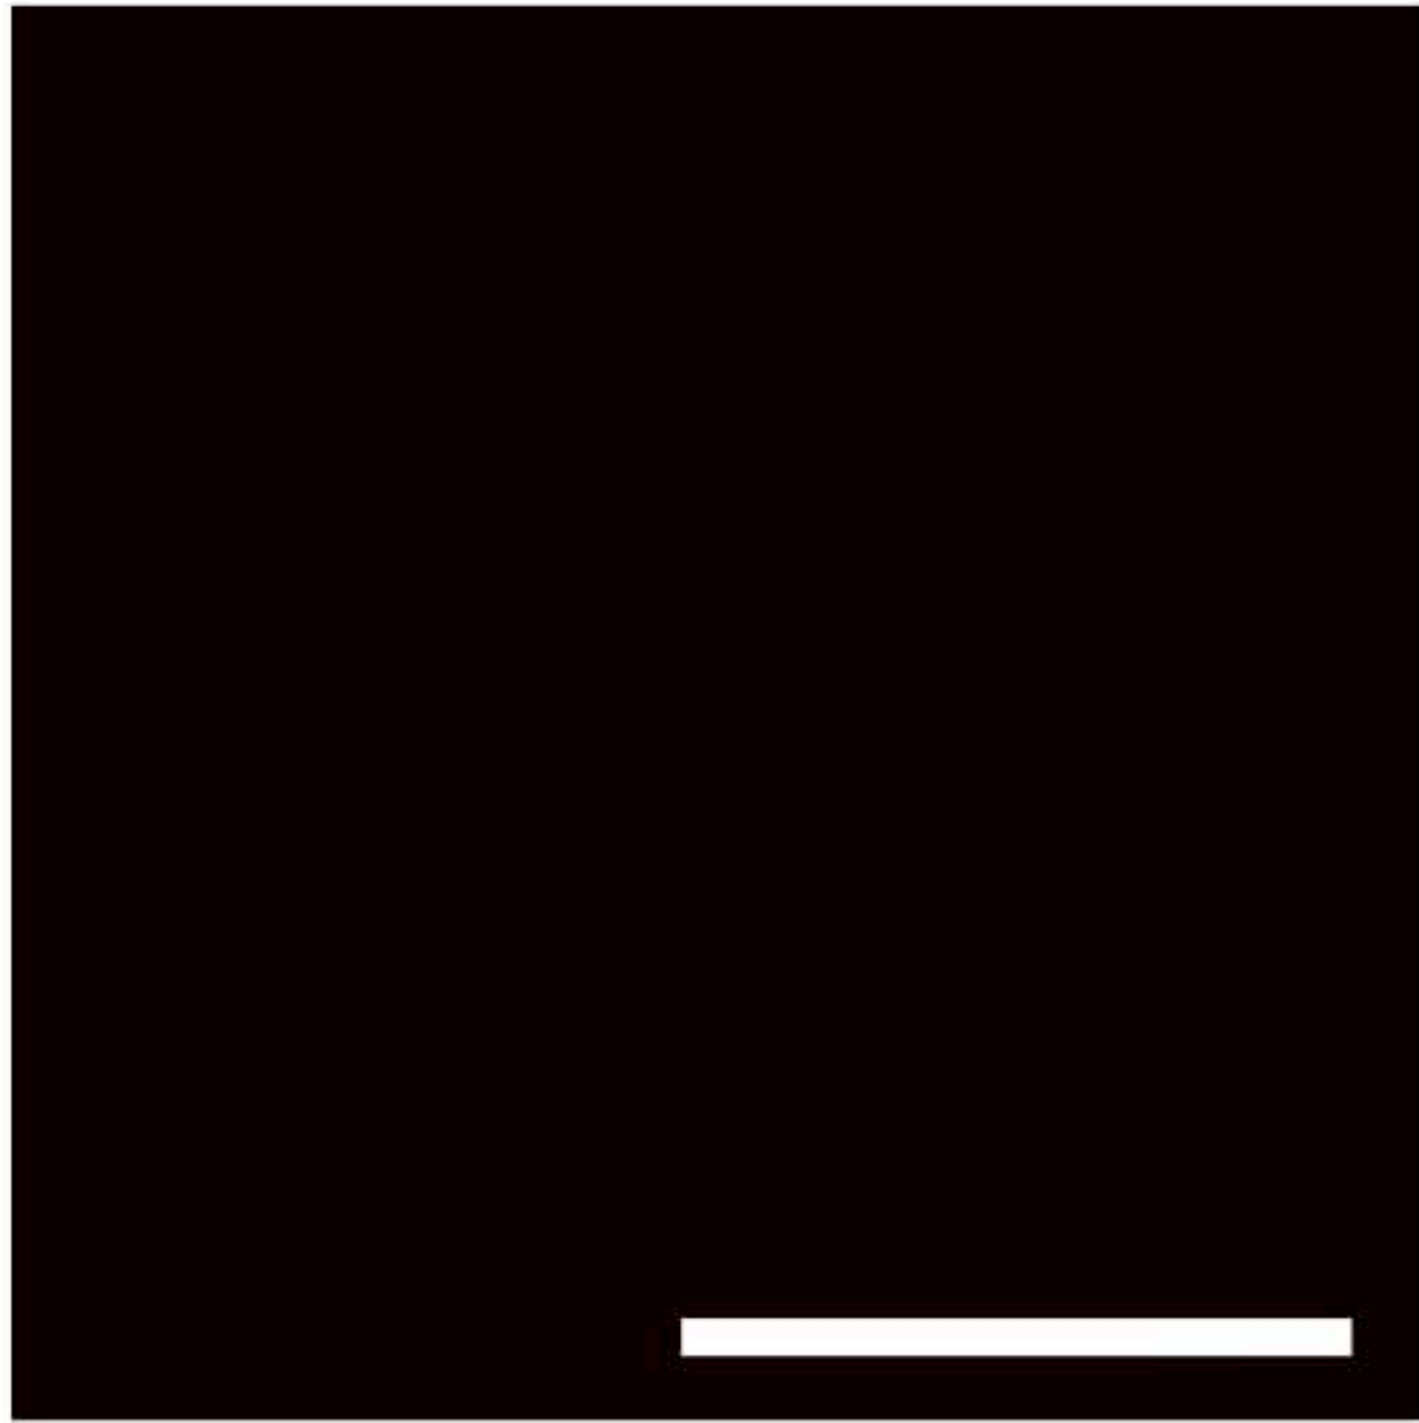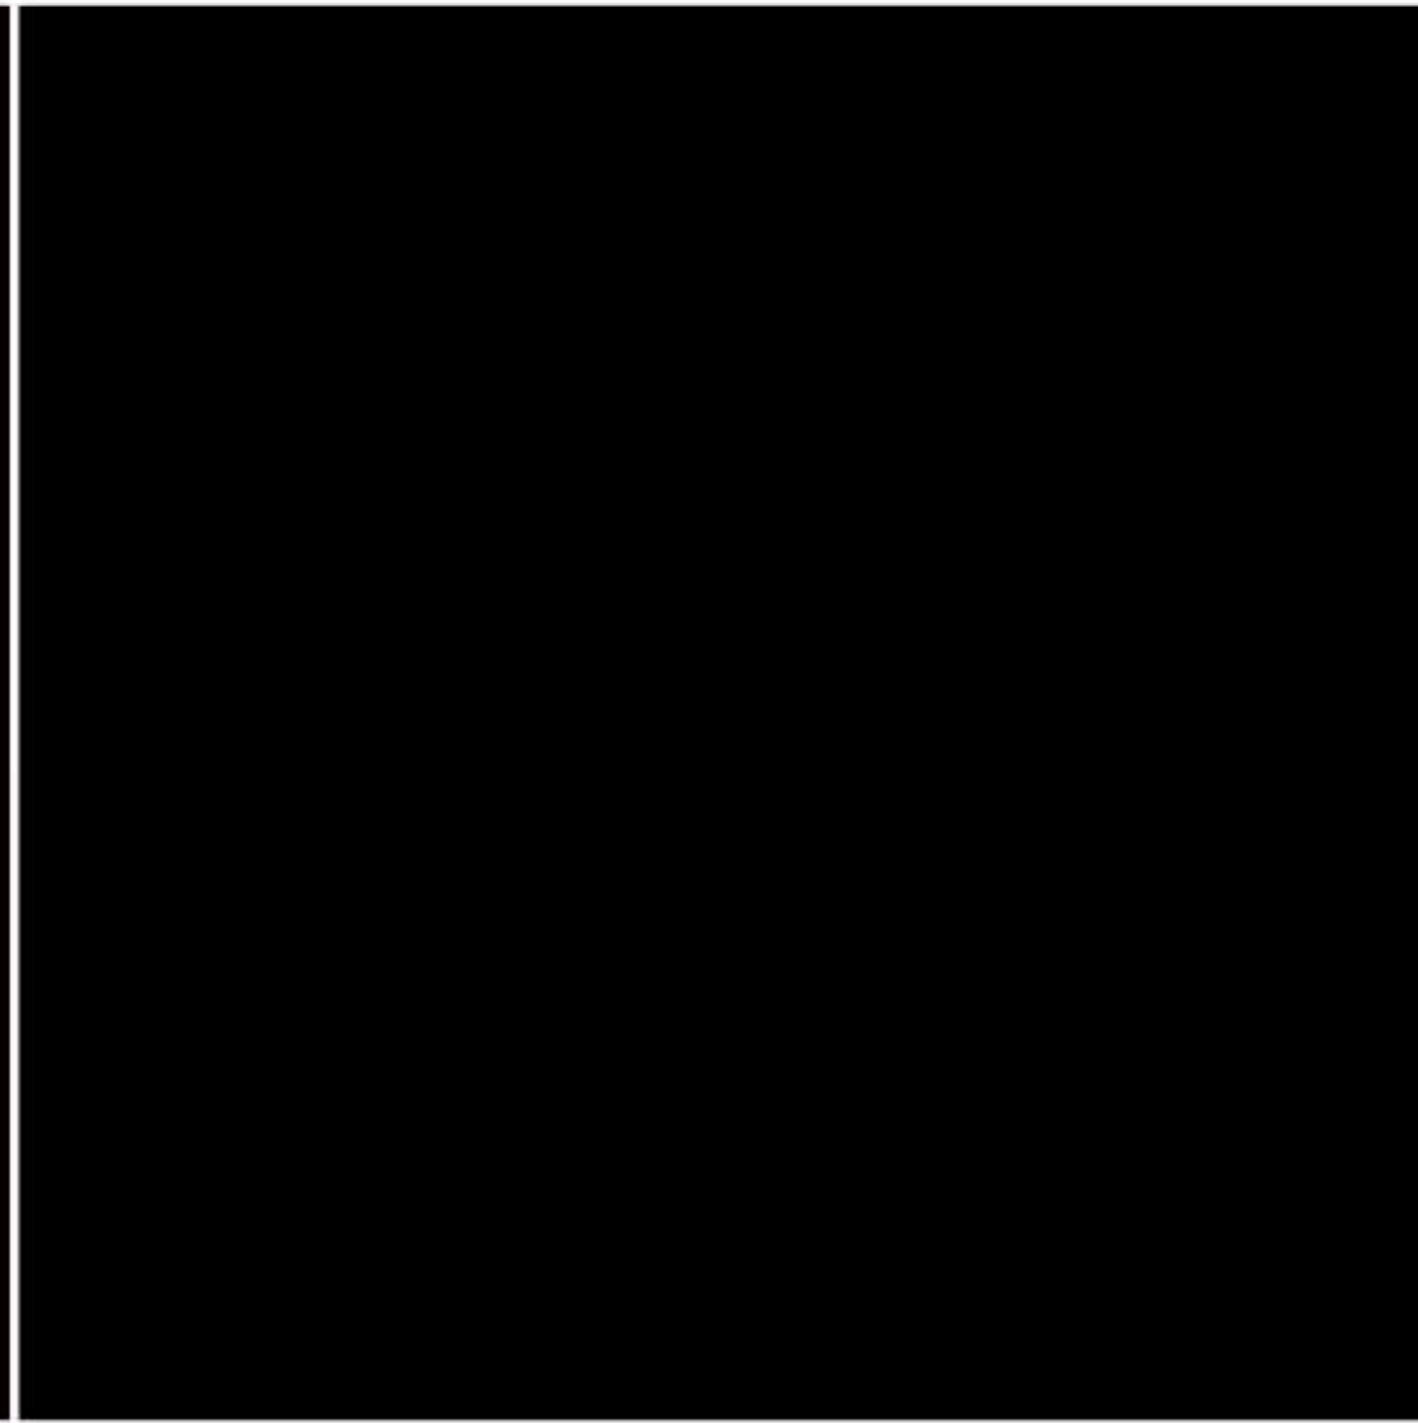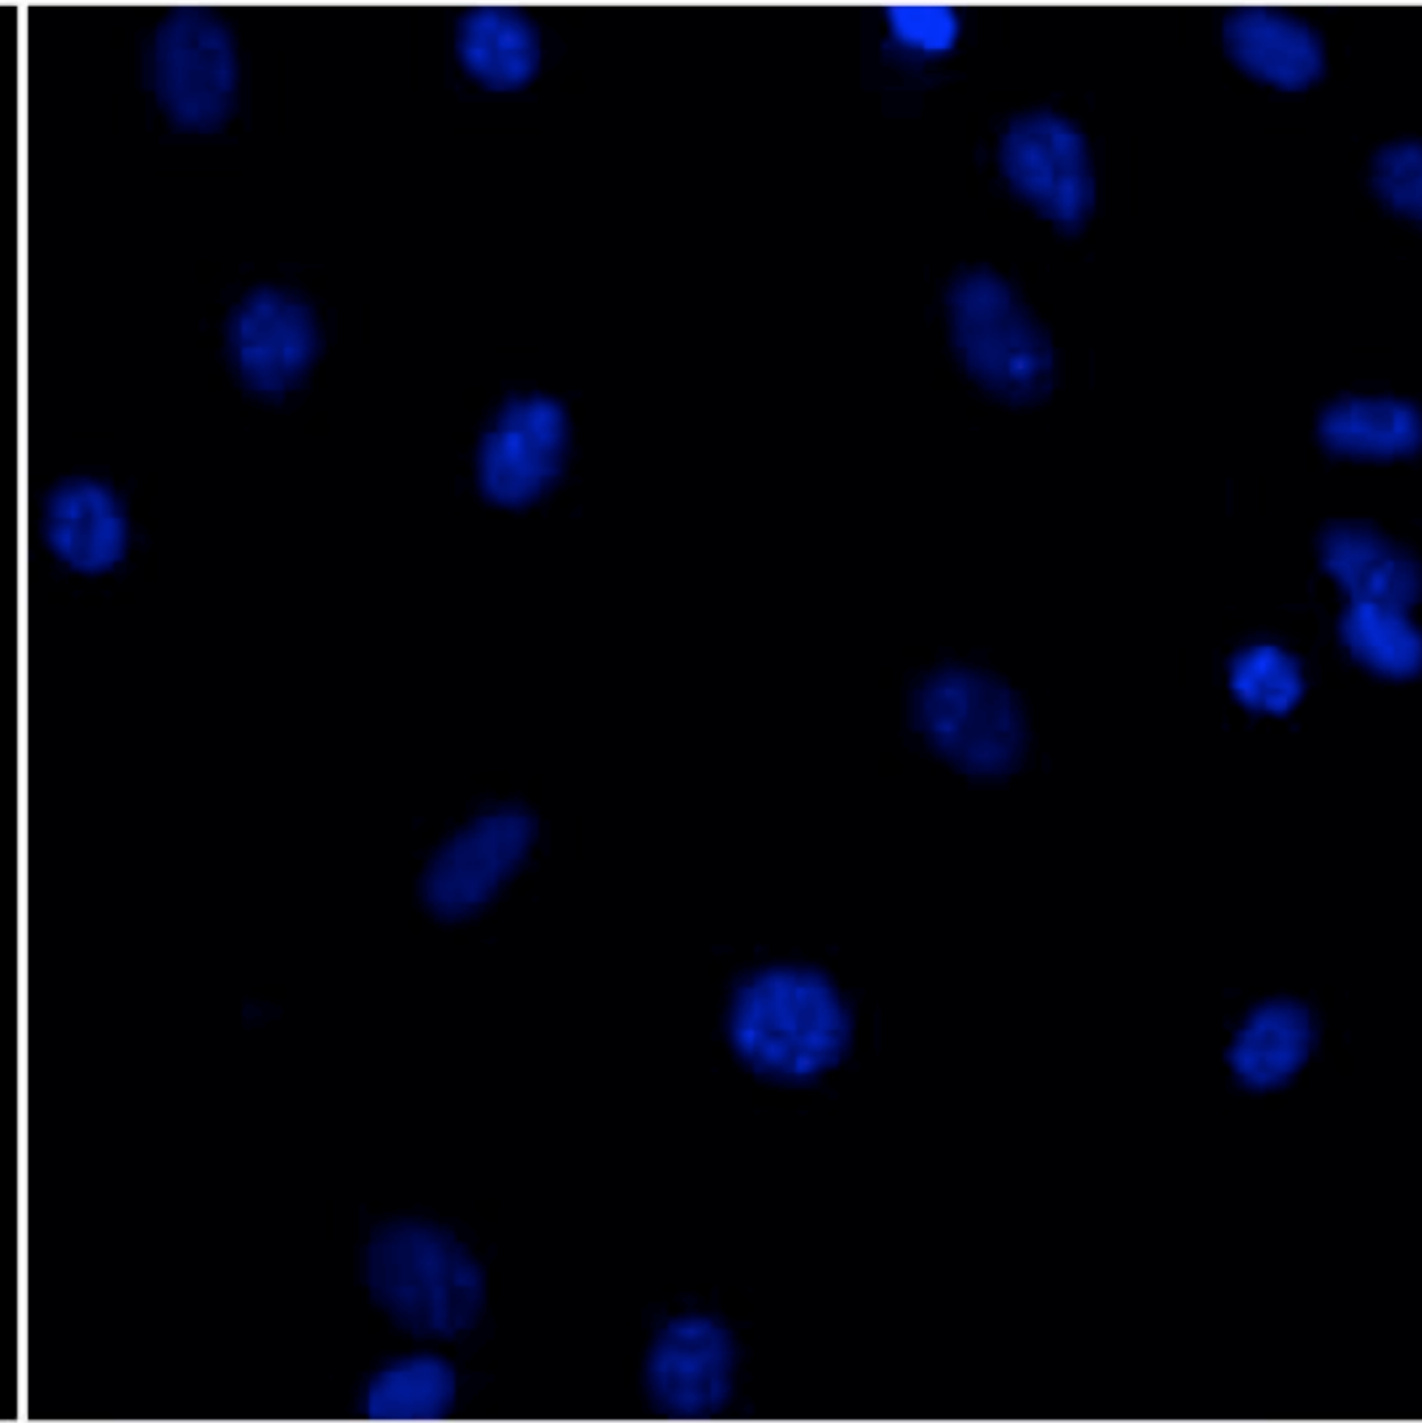

OS+chem+VA5+Dnmt1 KD

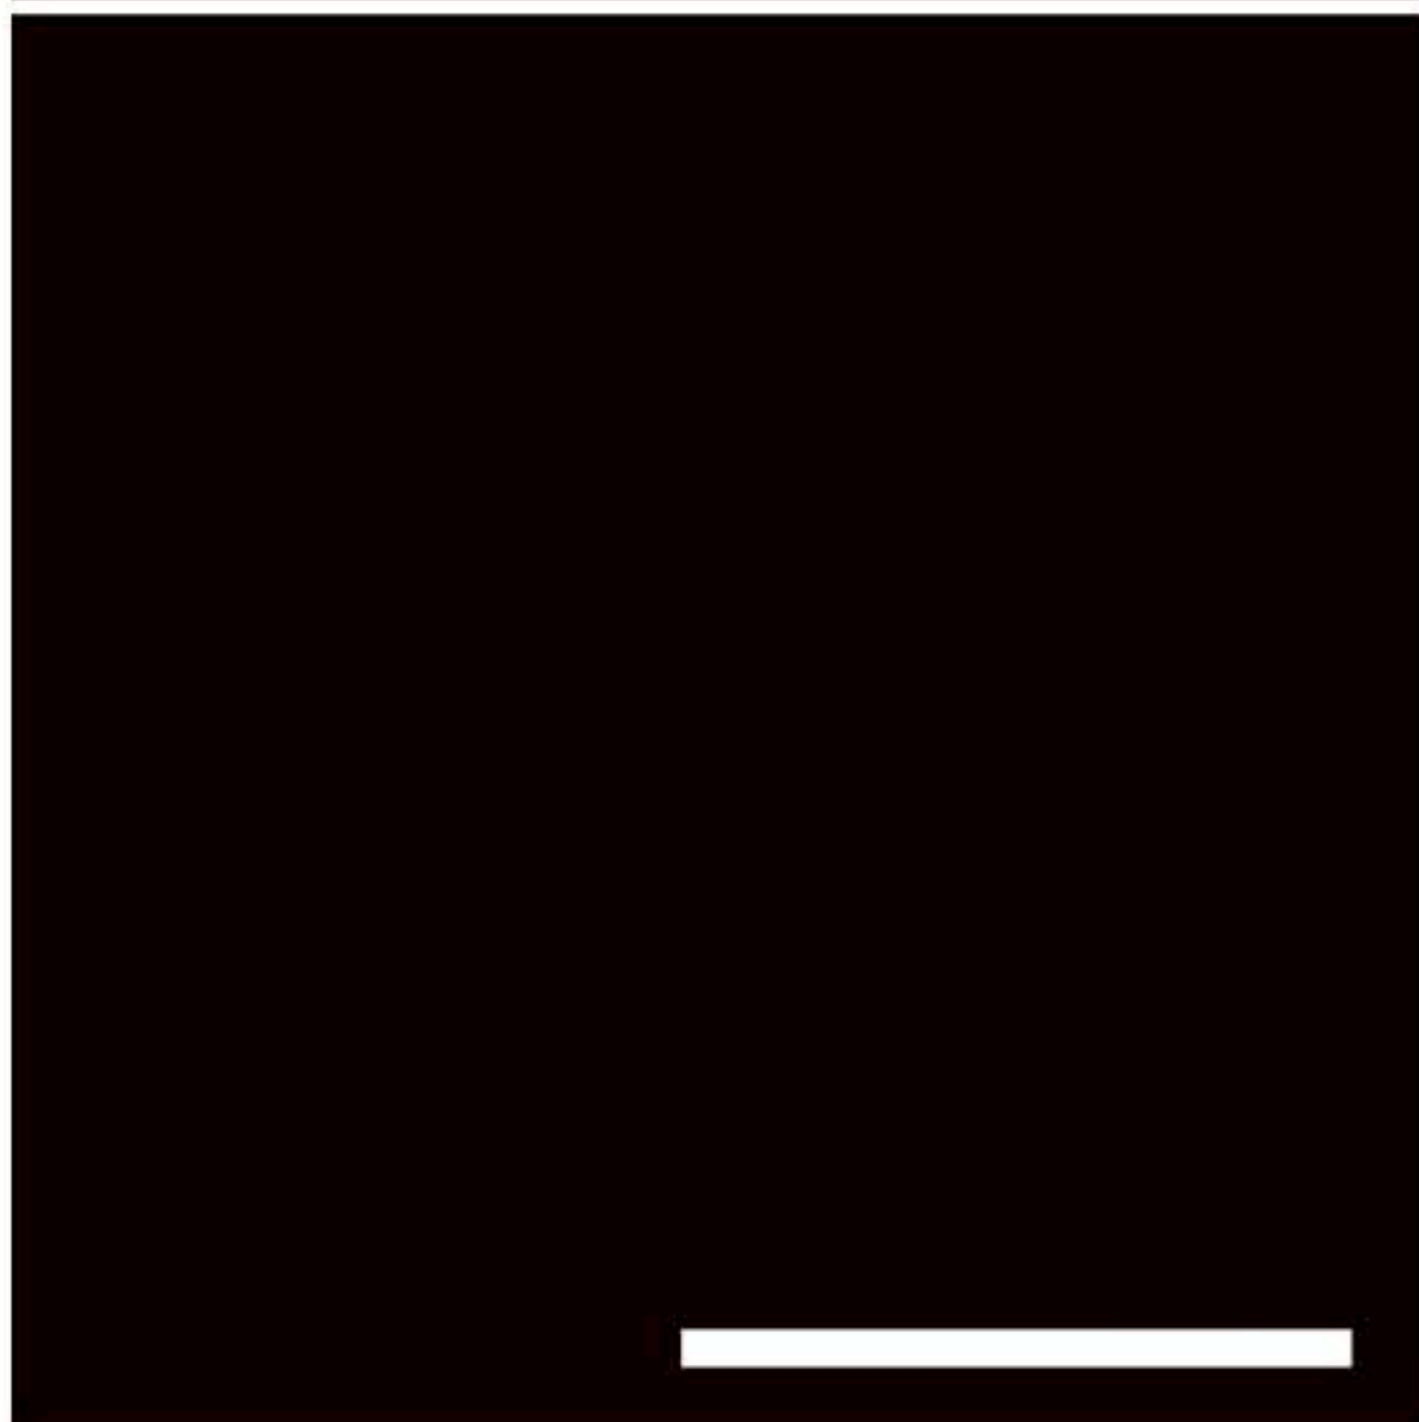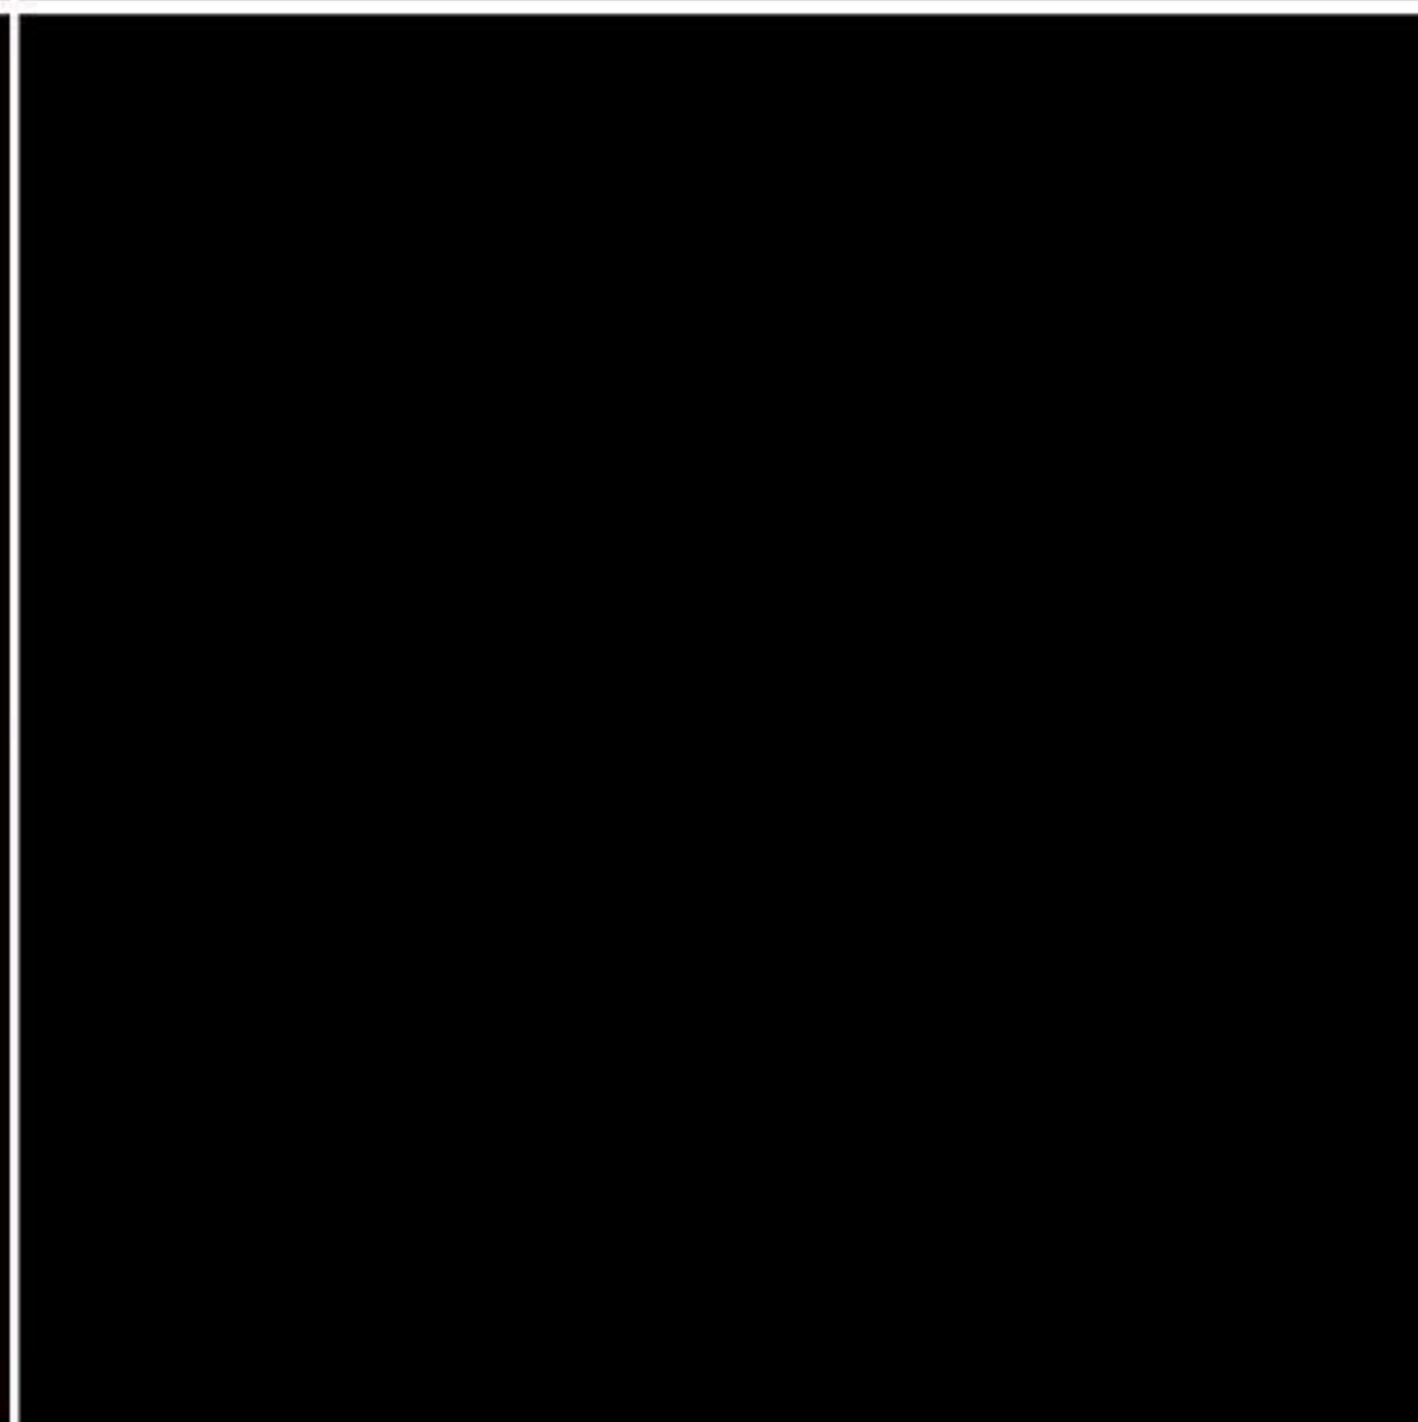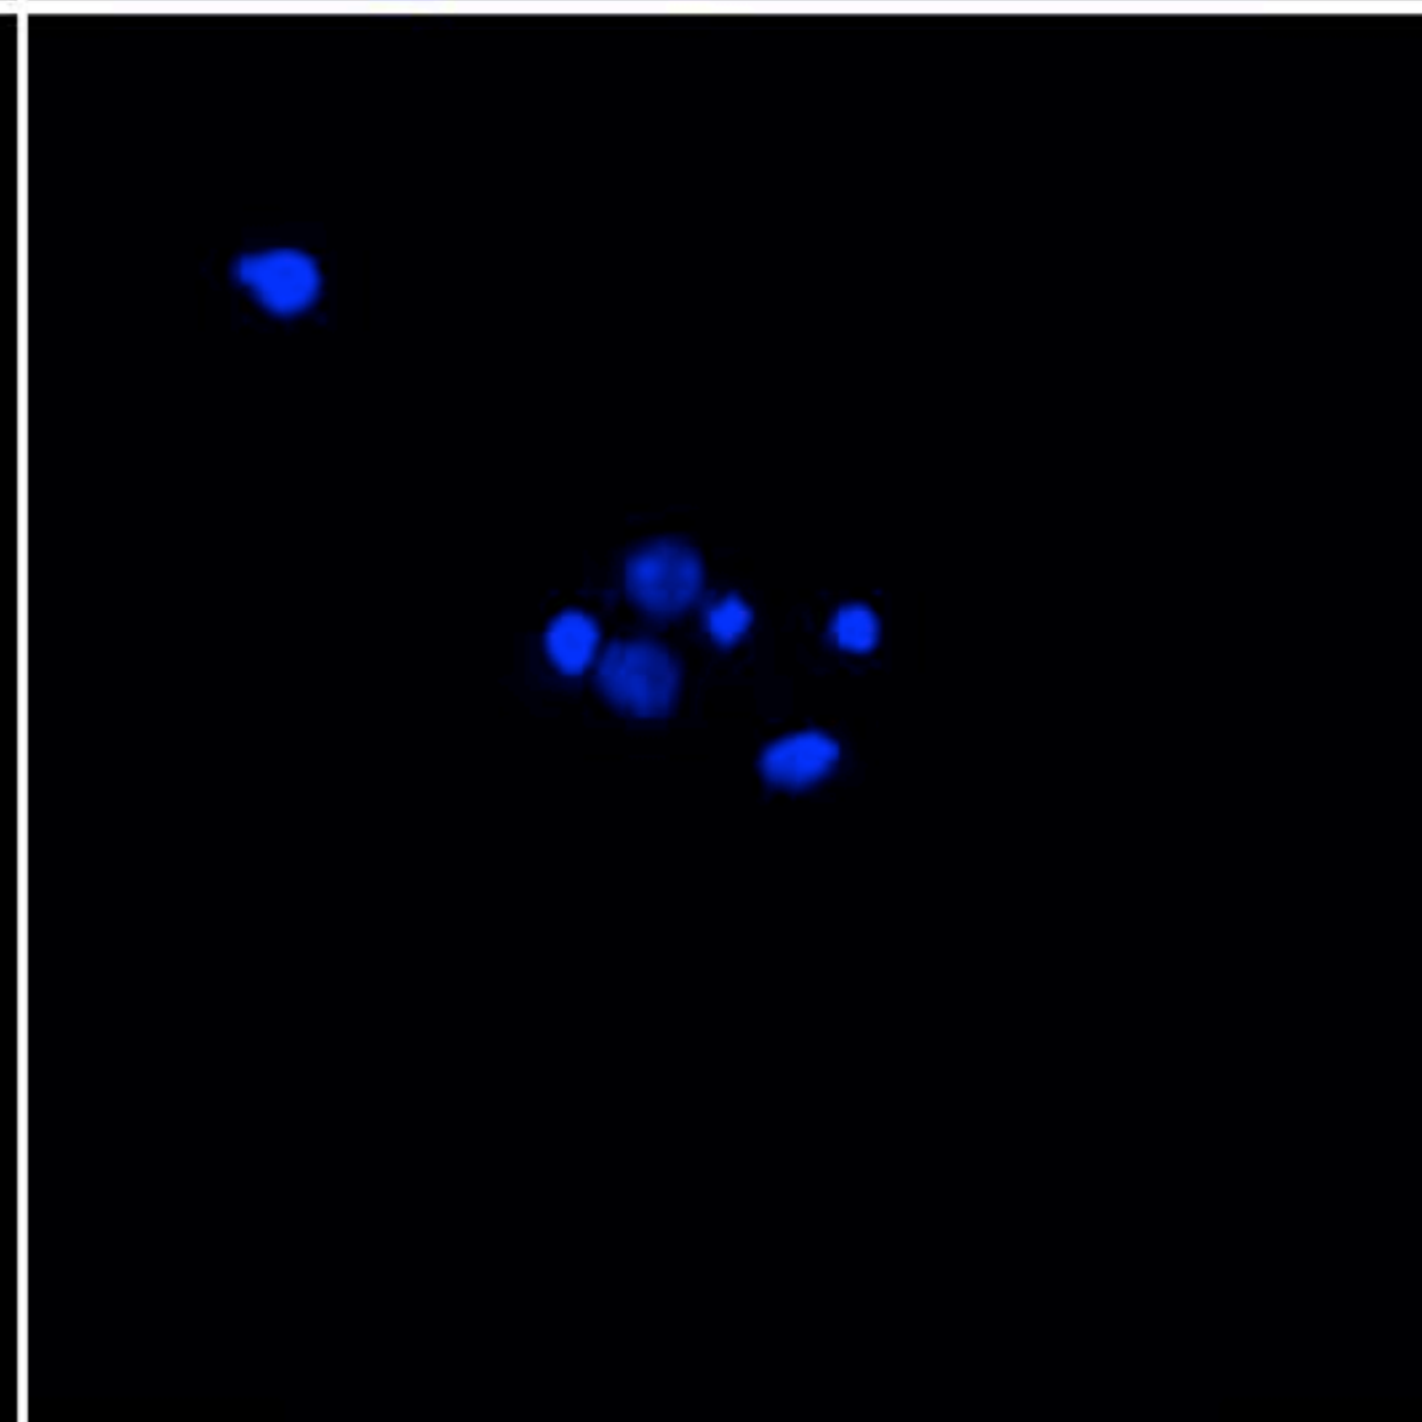

Max KD VR15 ESC

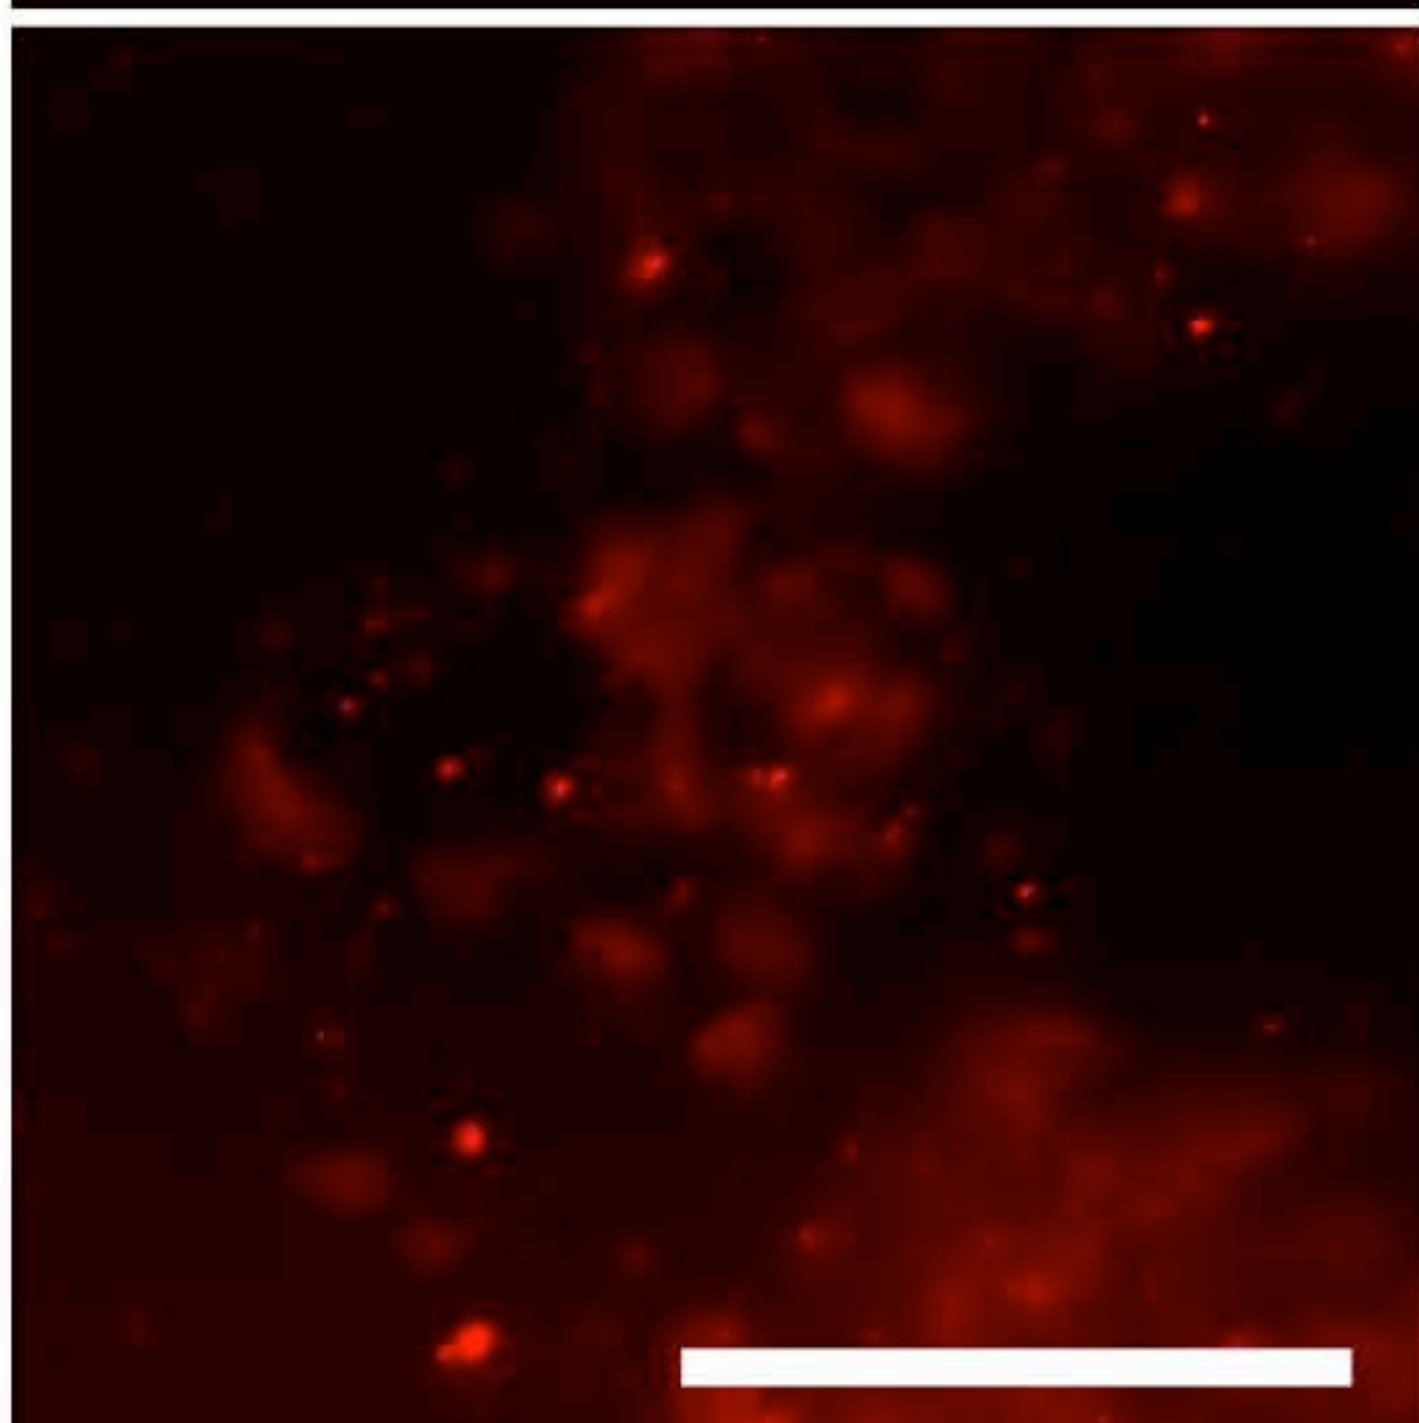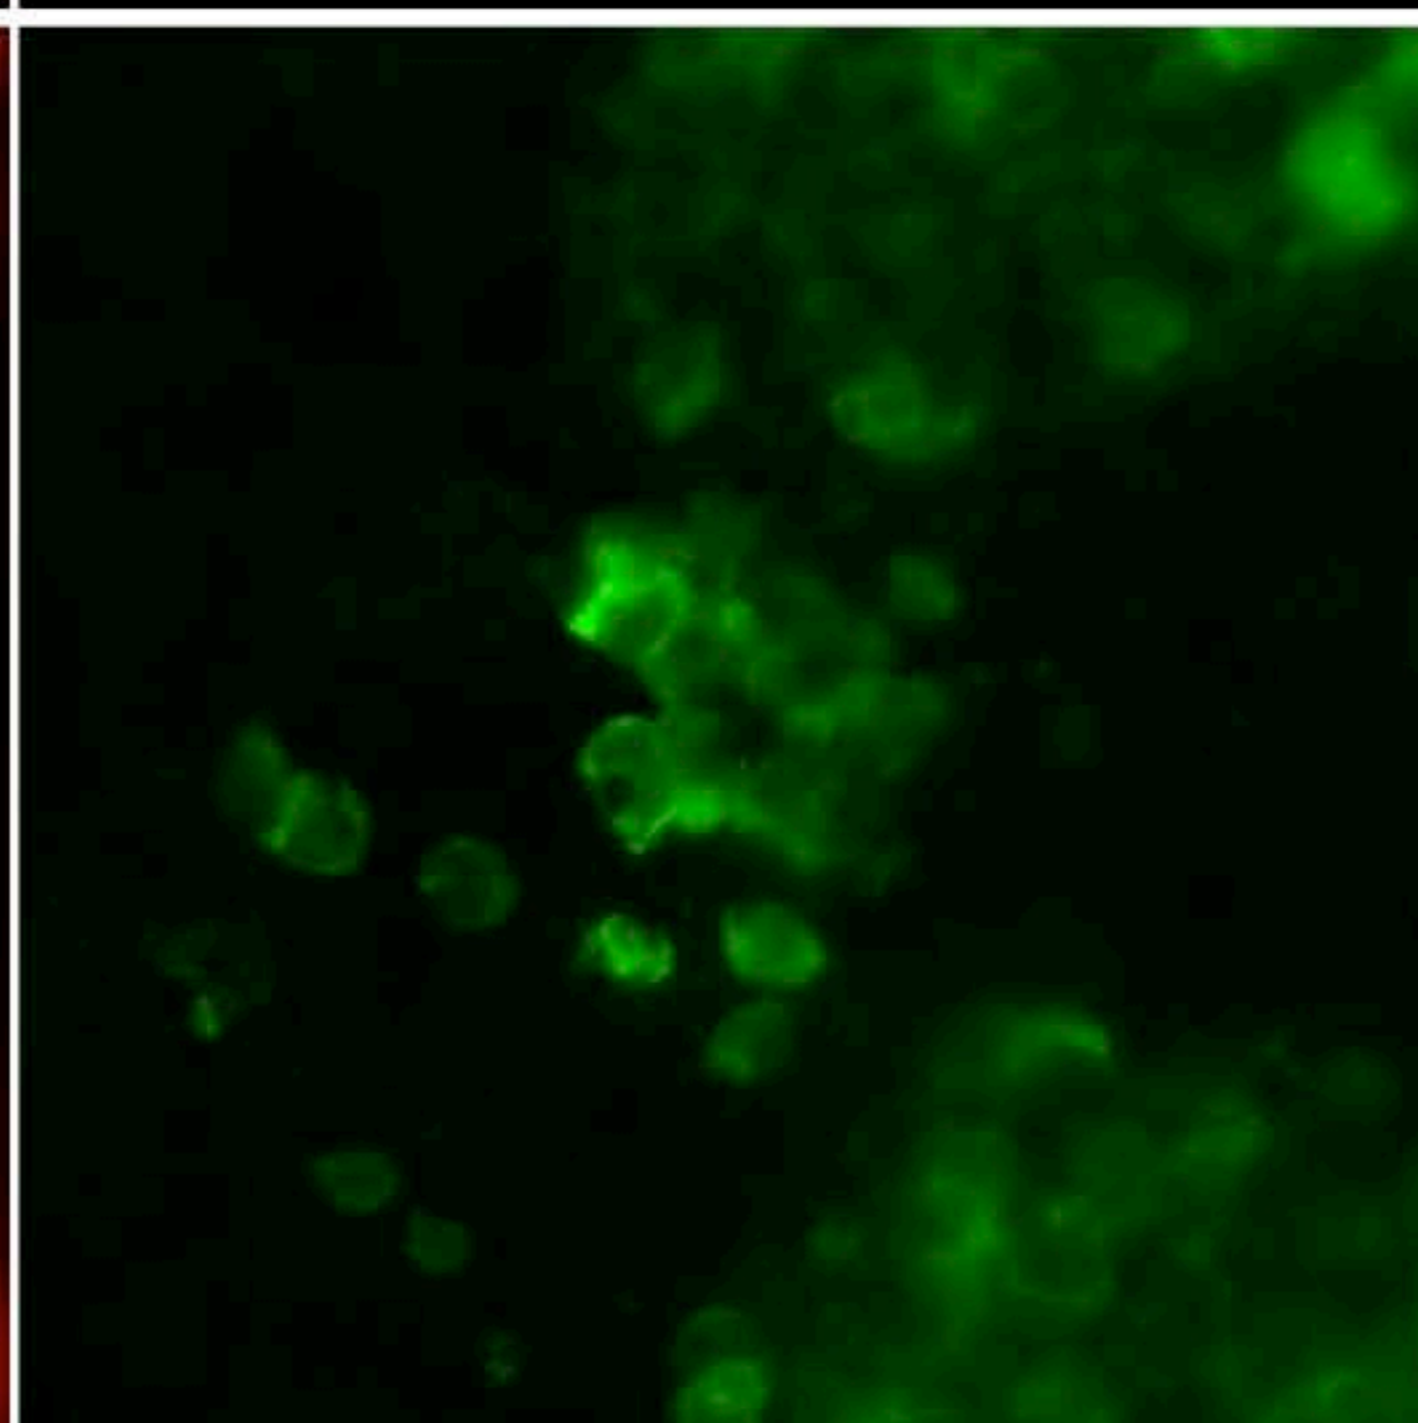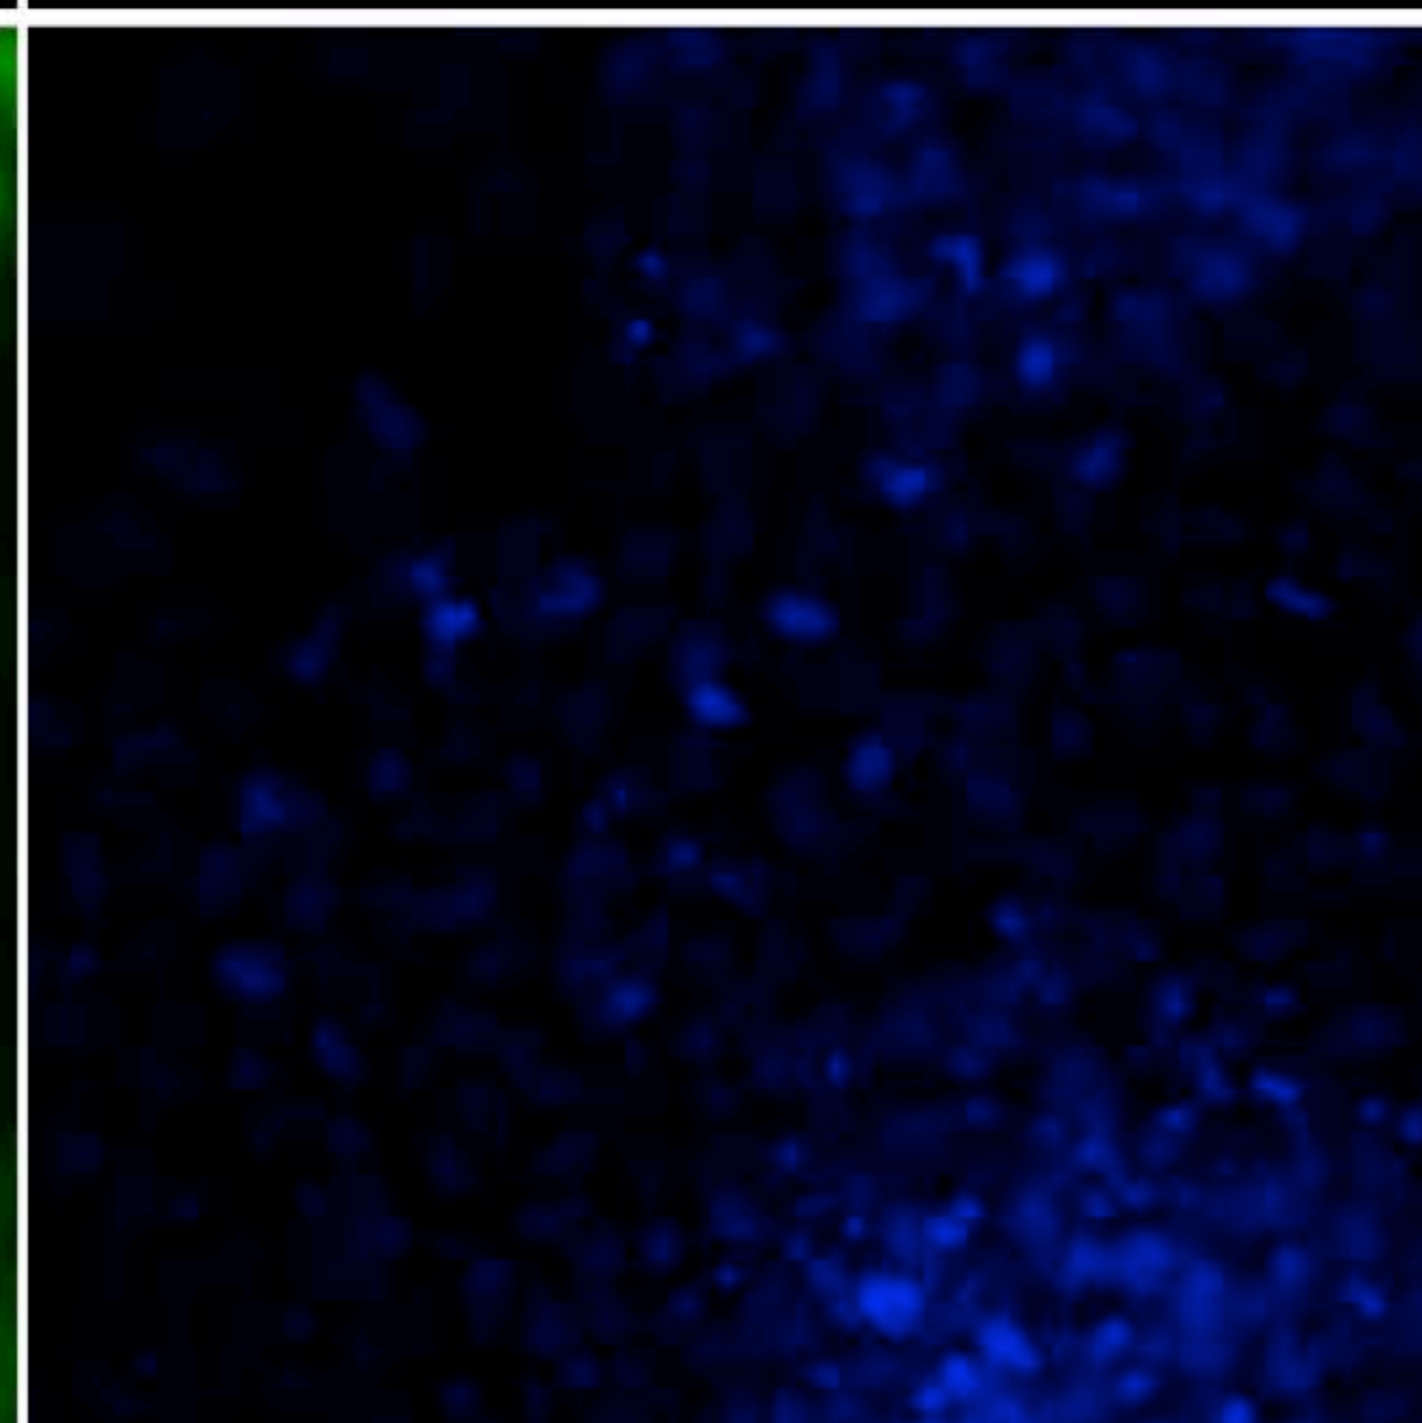

SYCP3

DAPI

OS+Ctrl siRNA

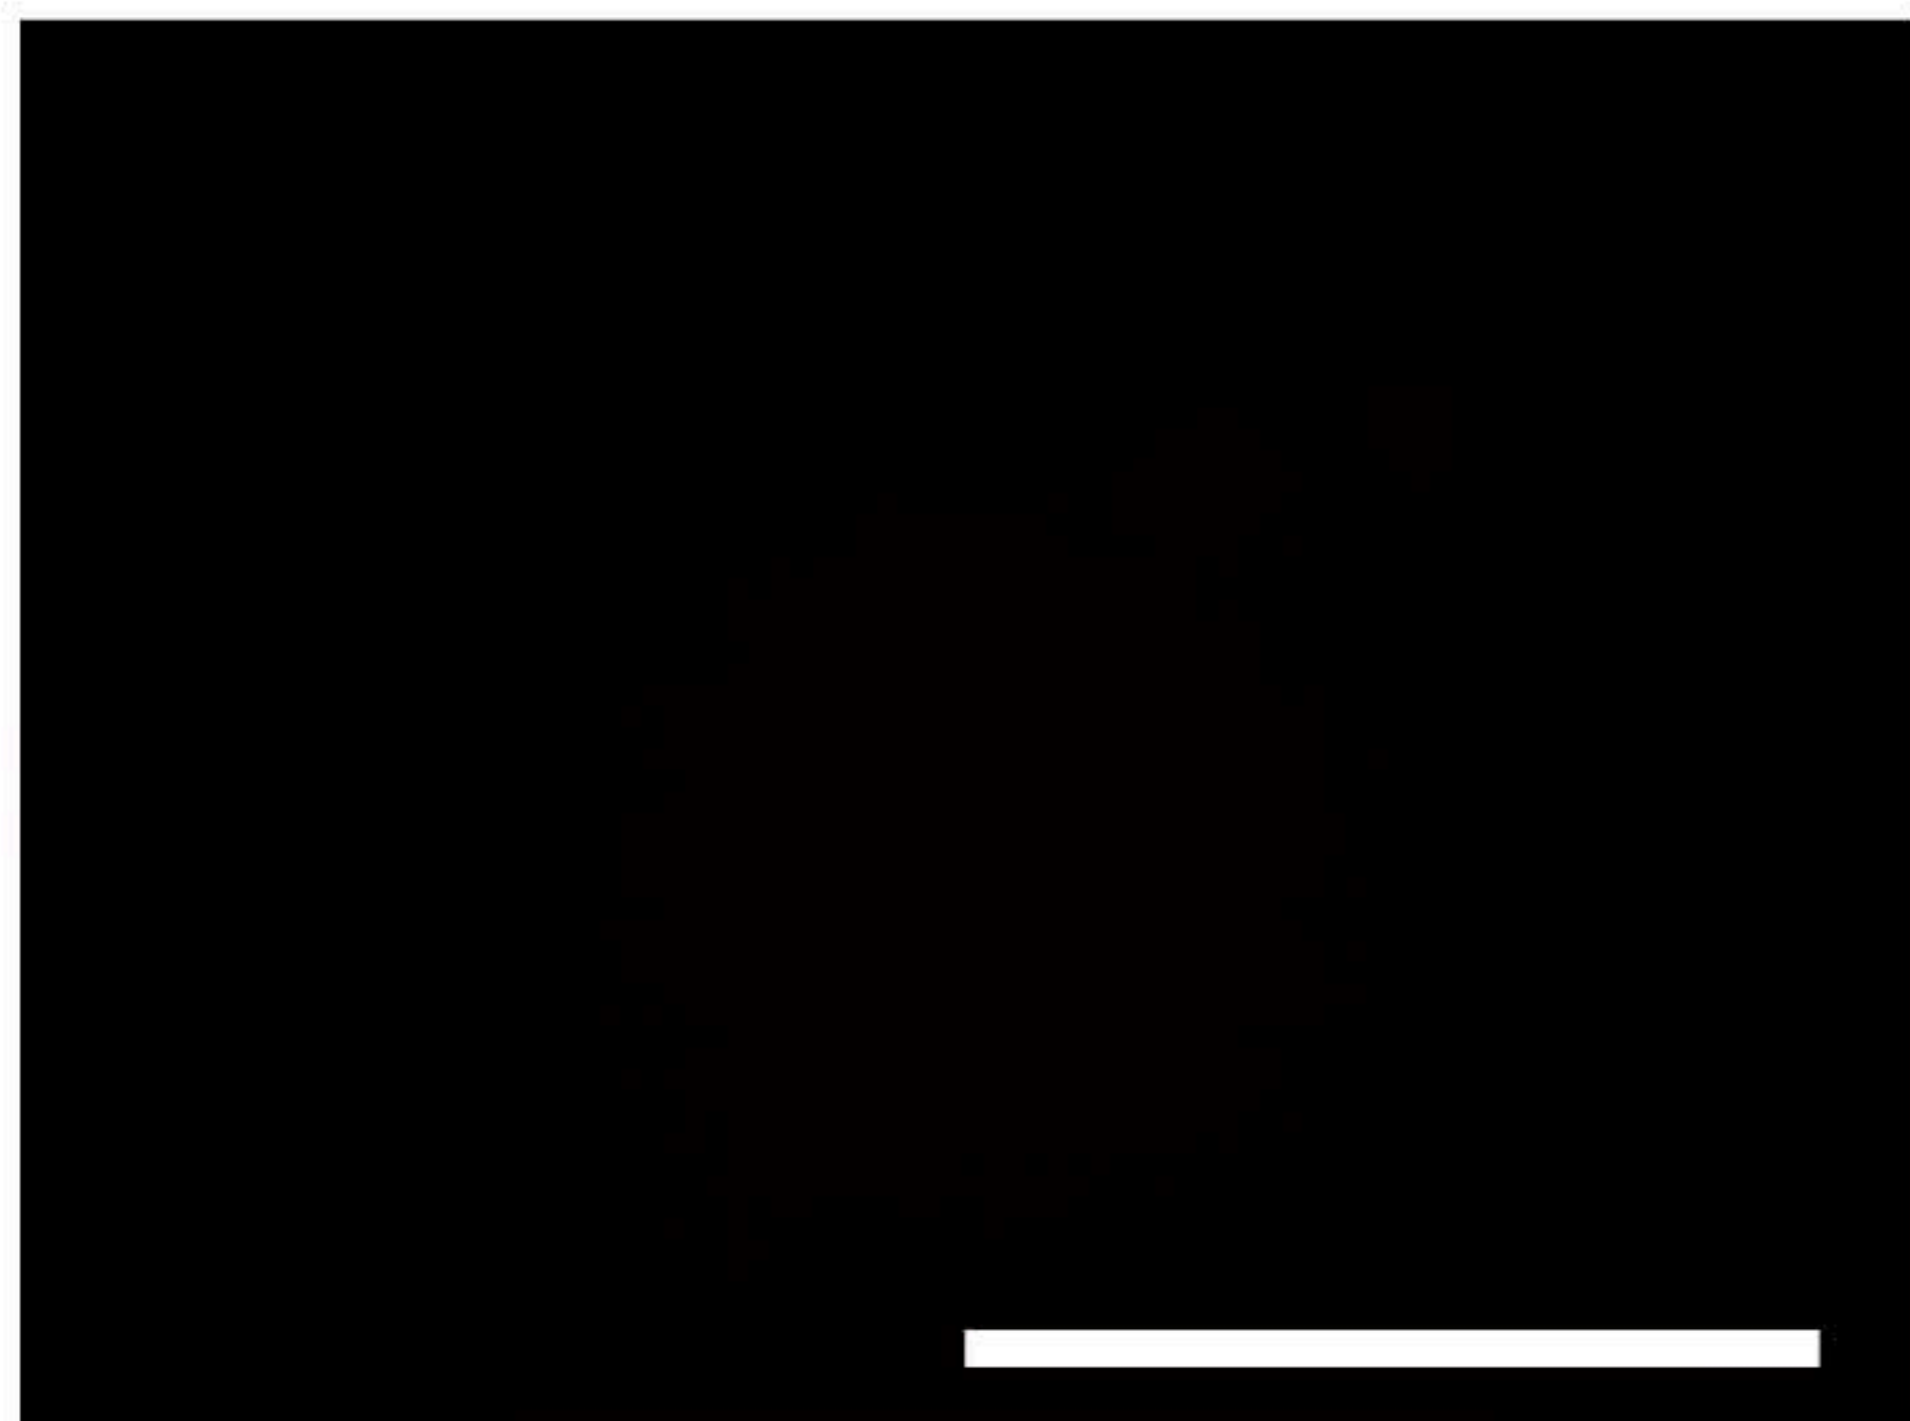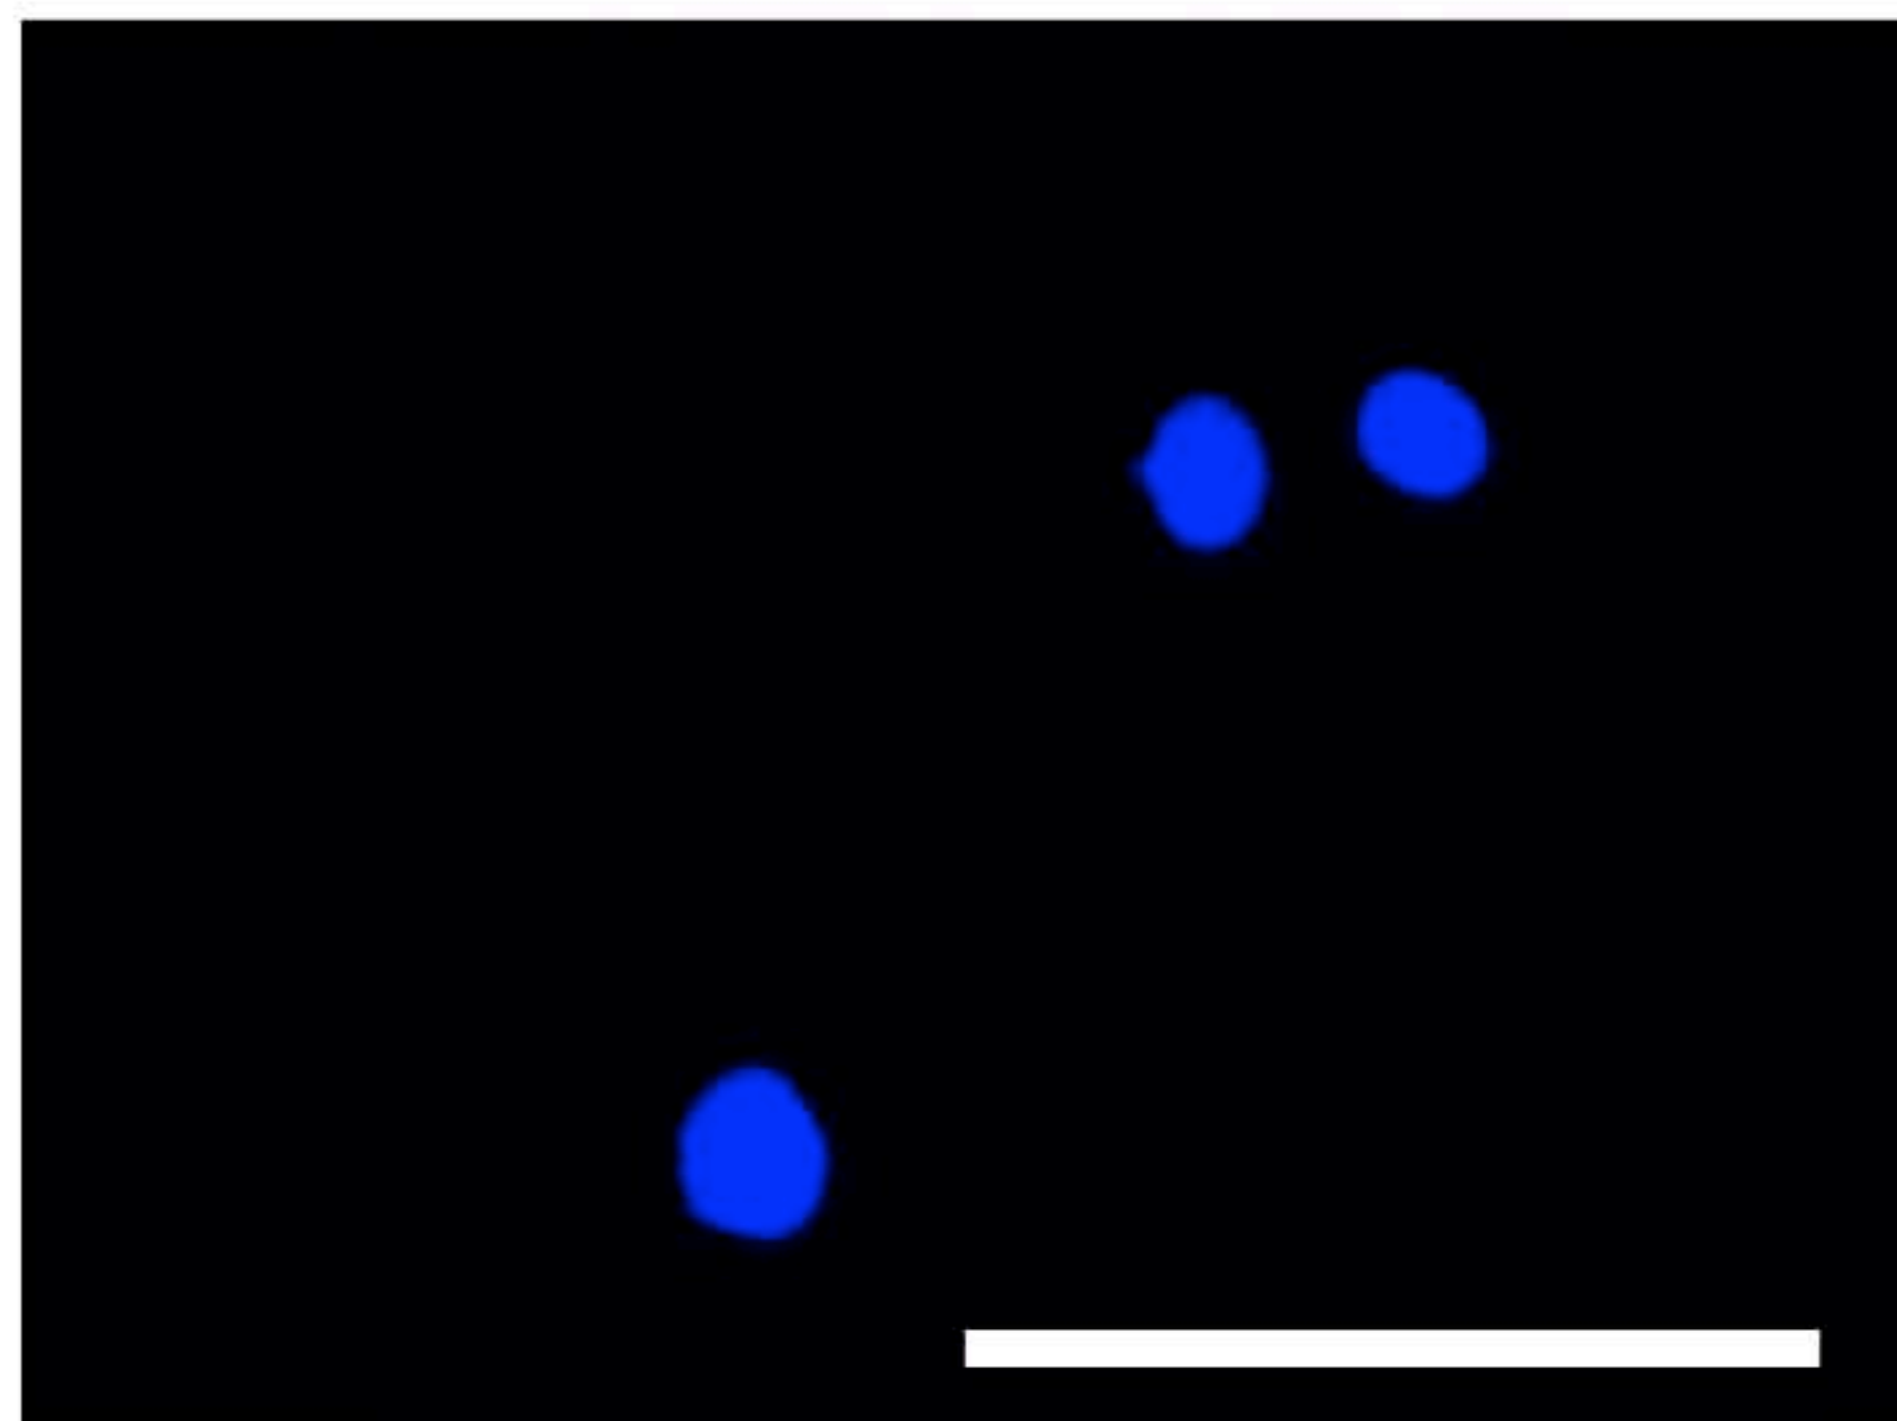

OS+chem+VA5+Dnmt1 KD

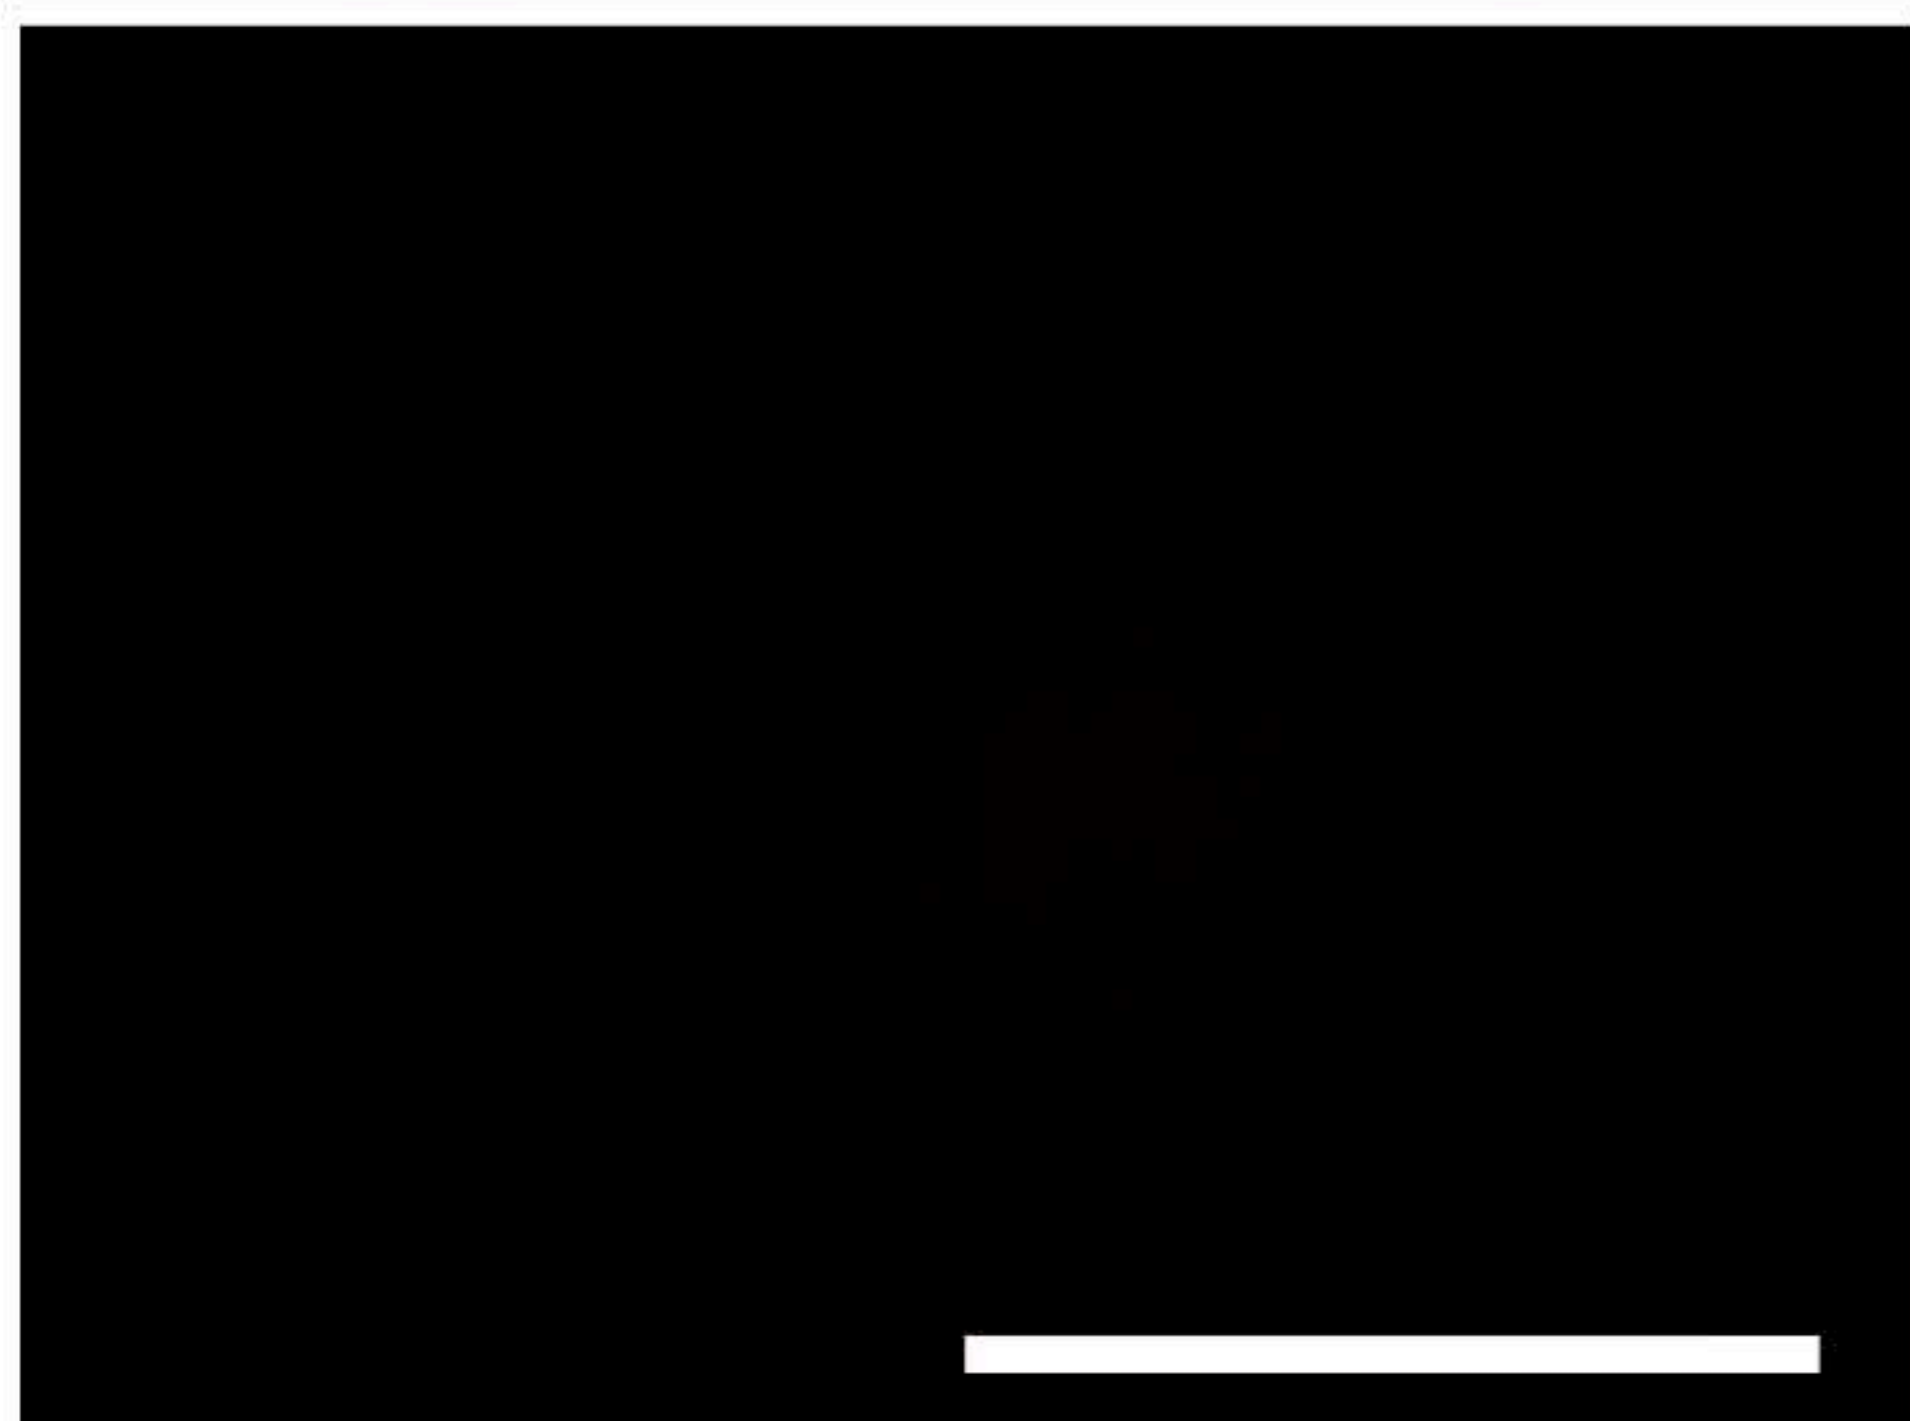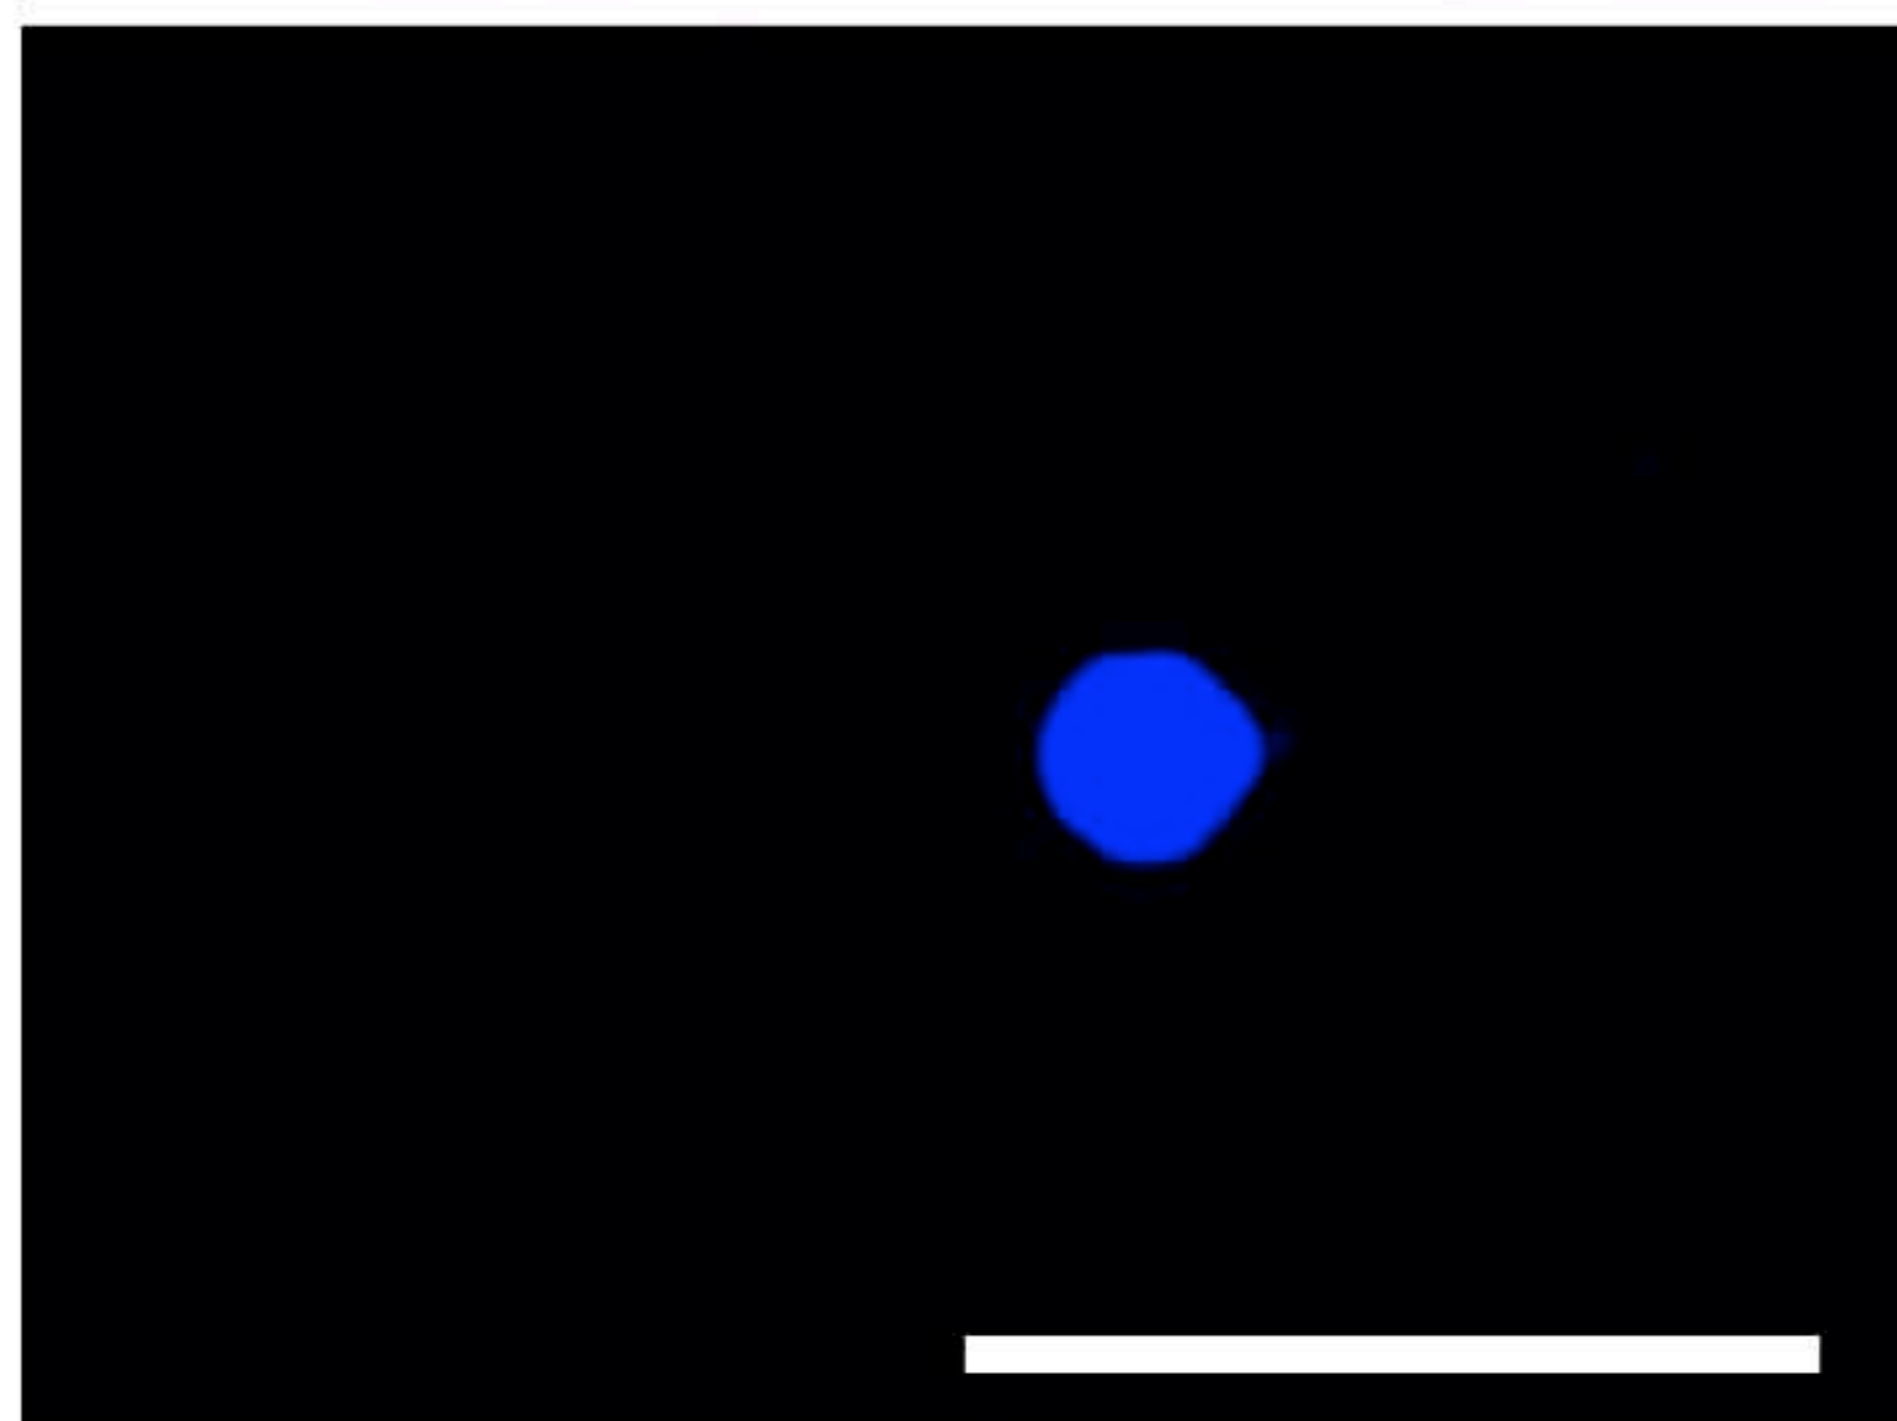

Max KD VR15 ESC

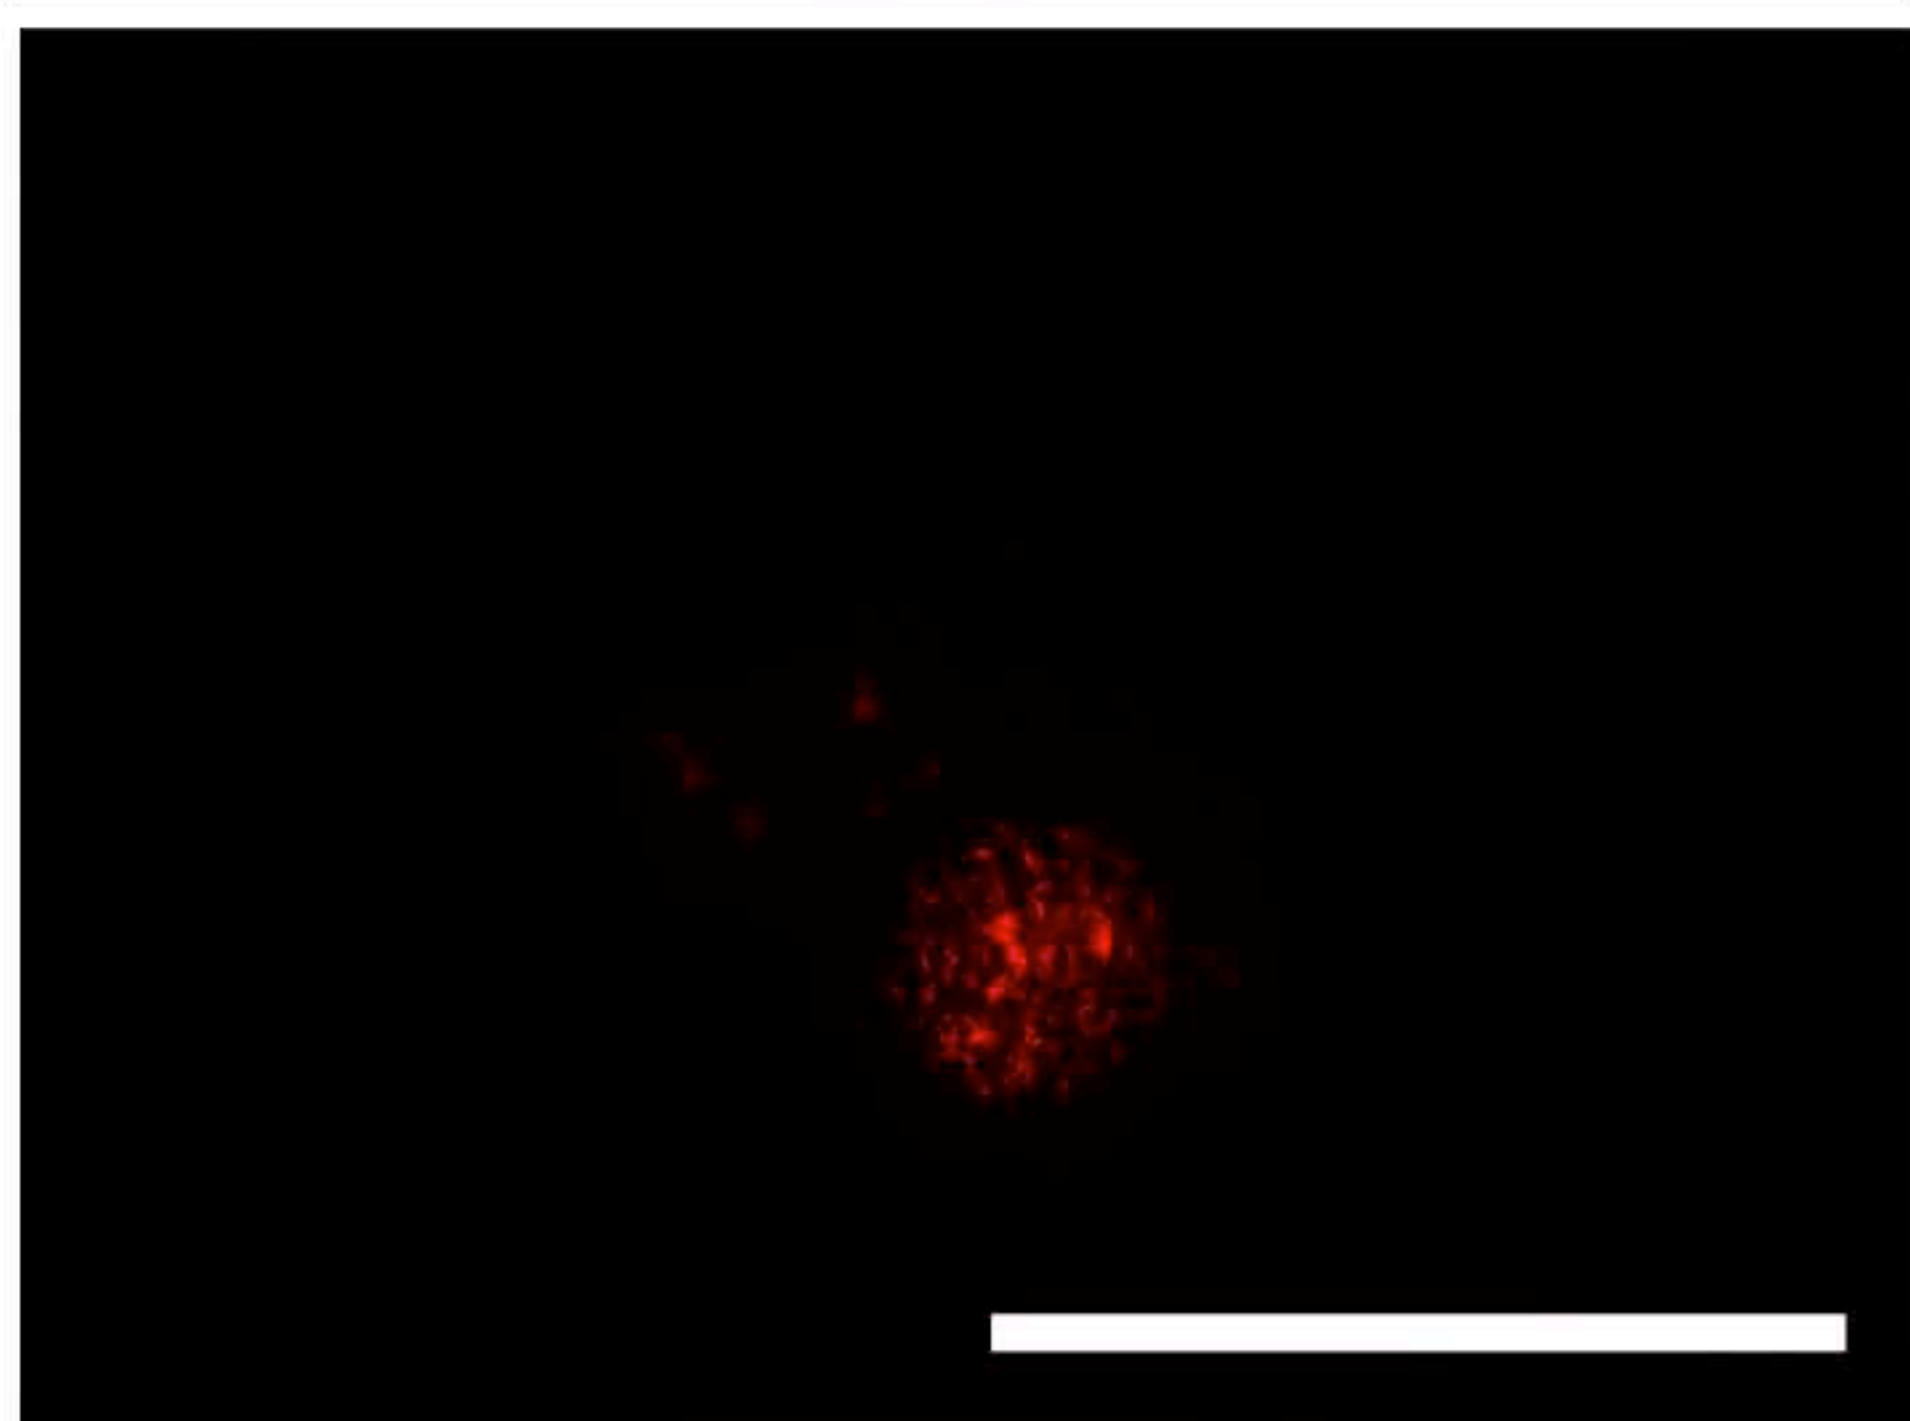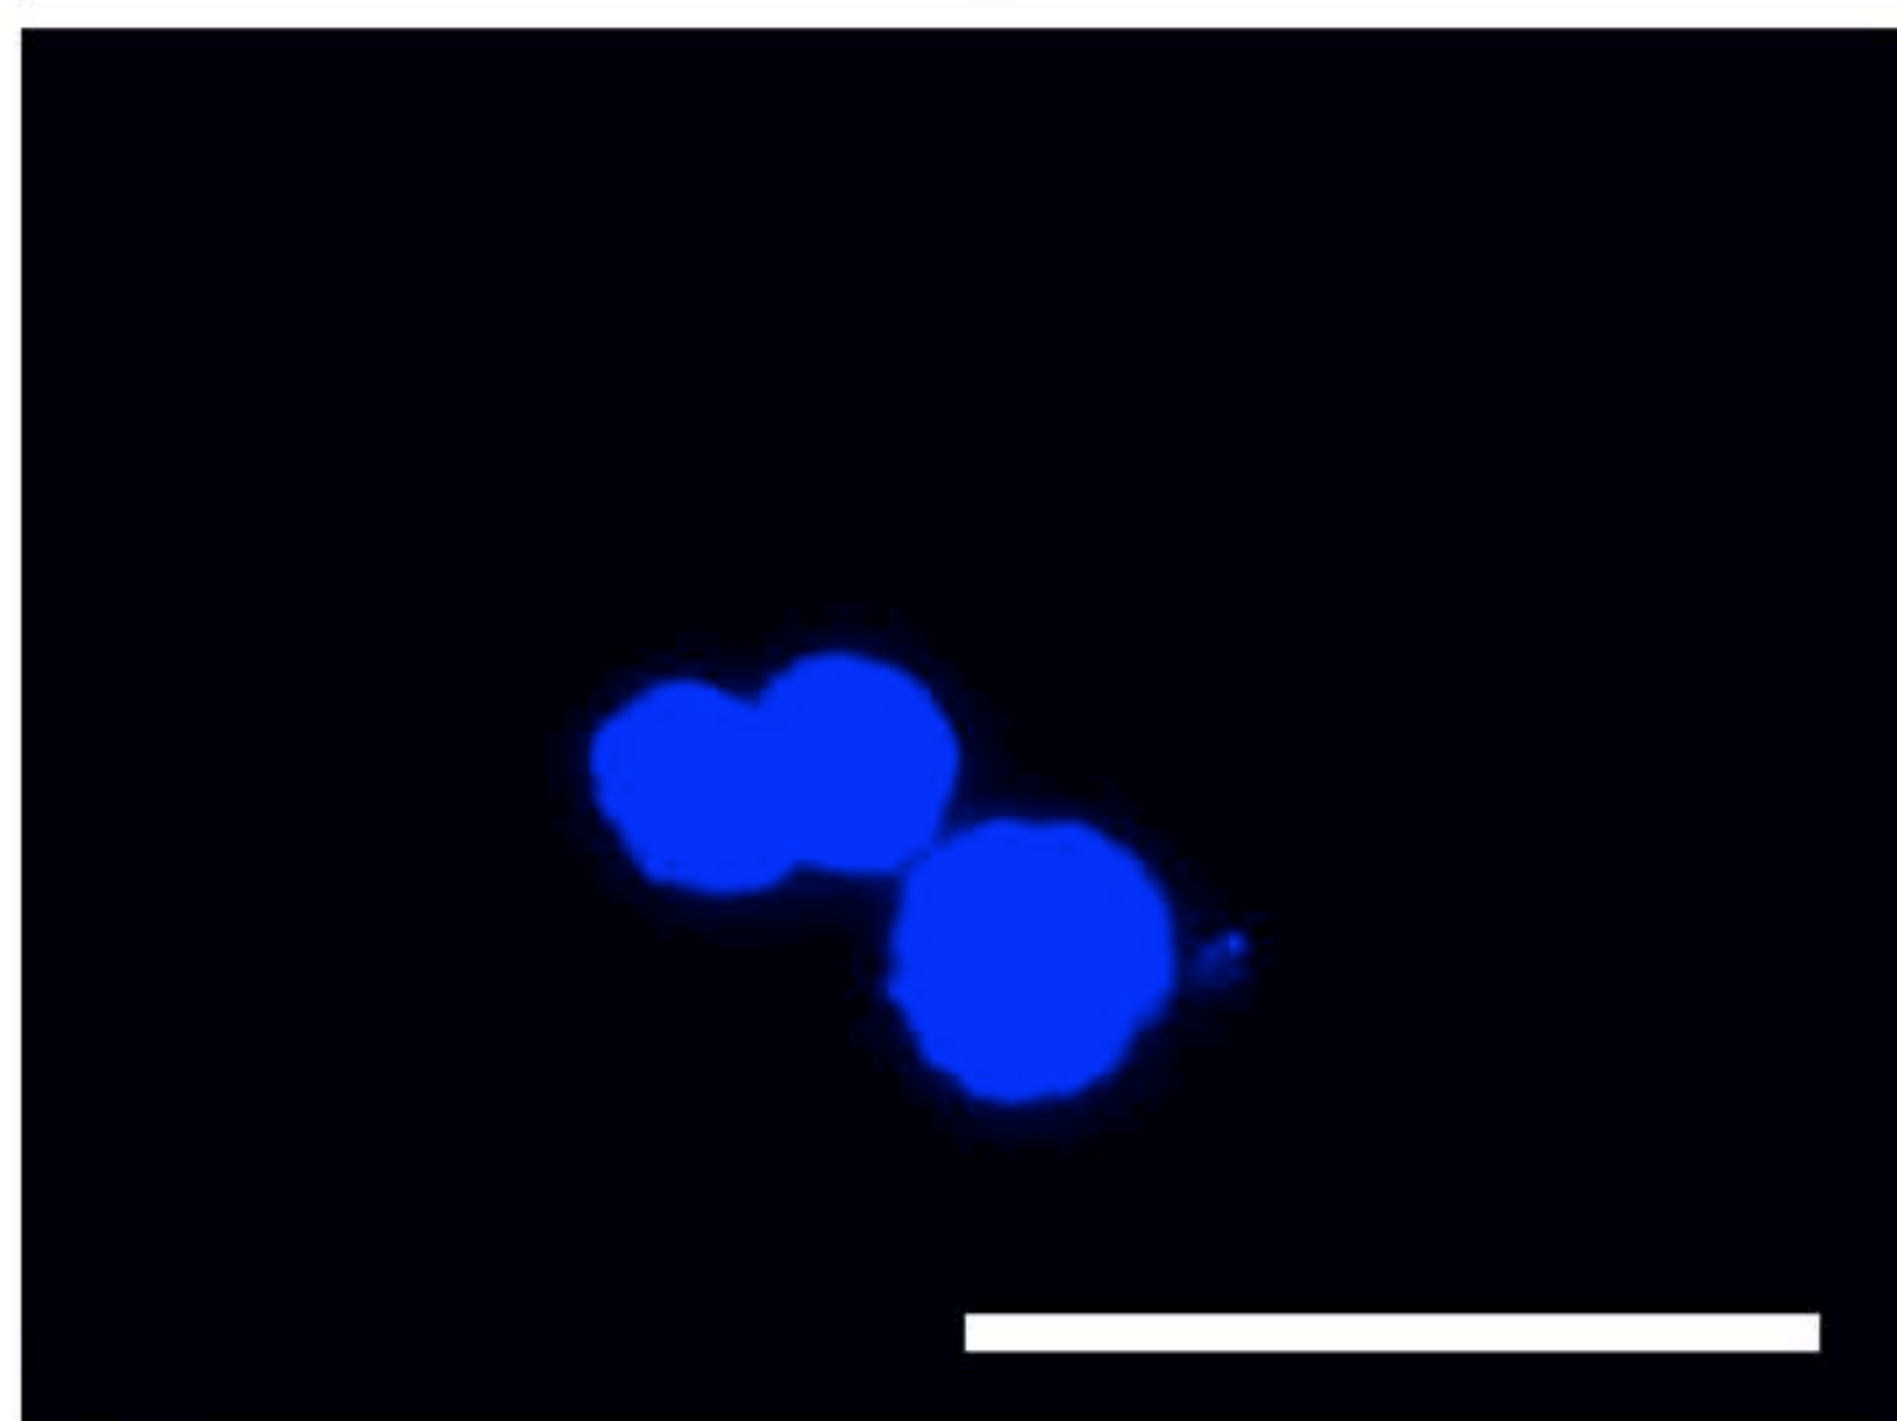

**a**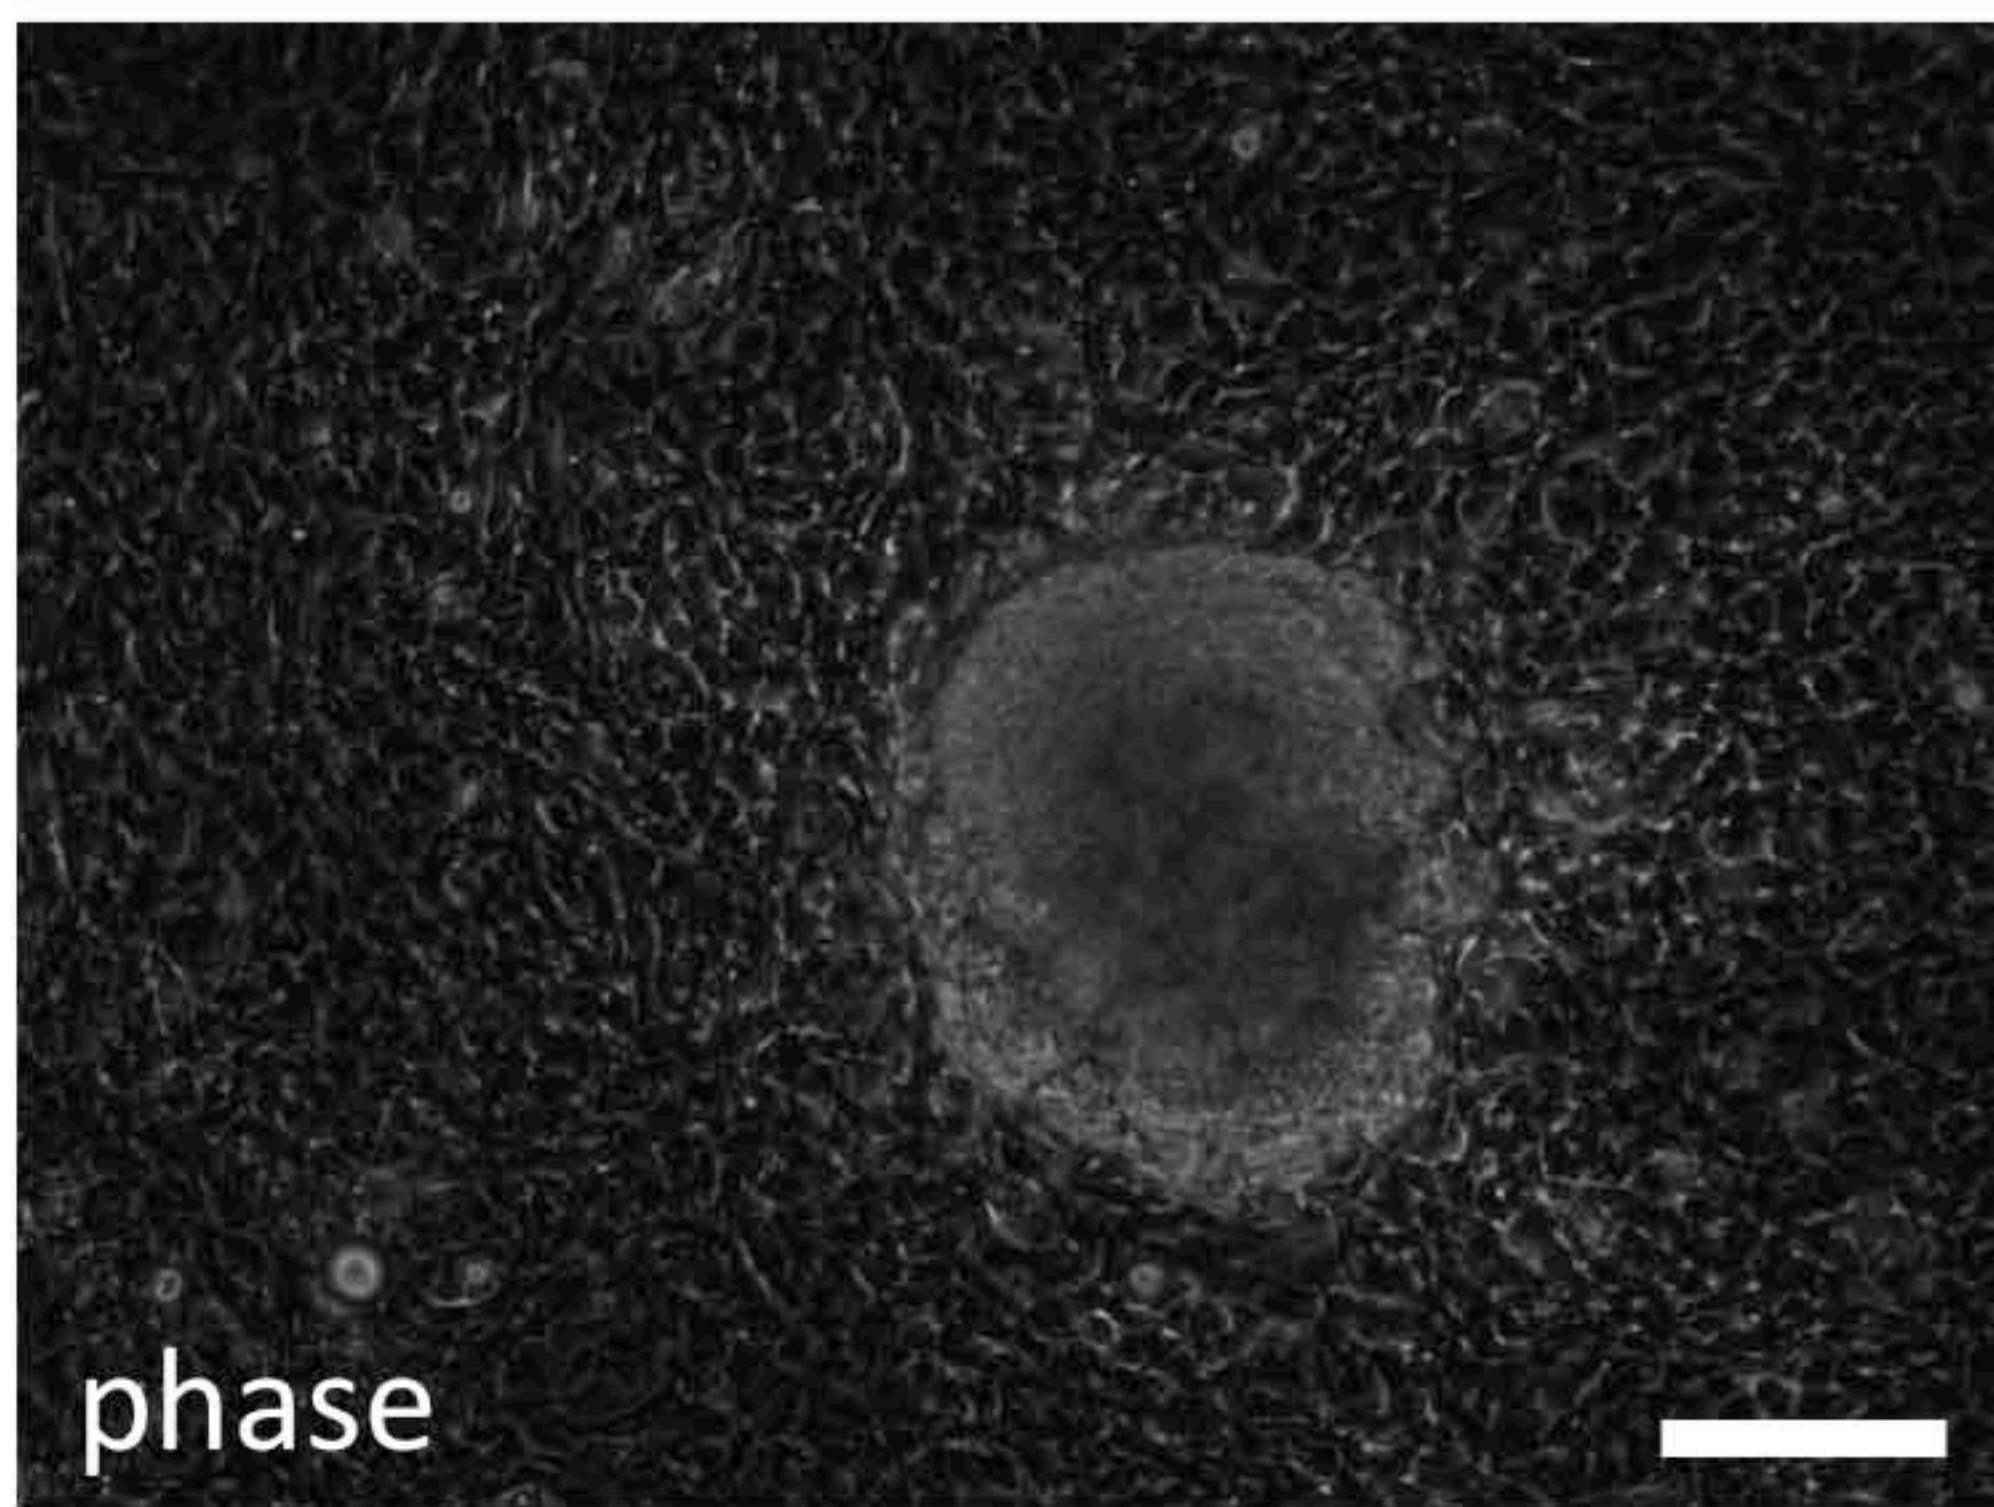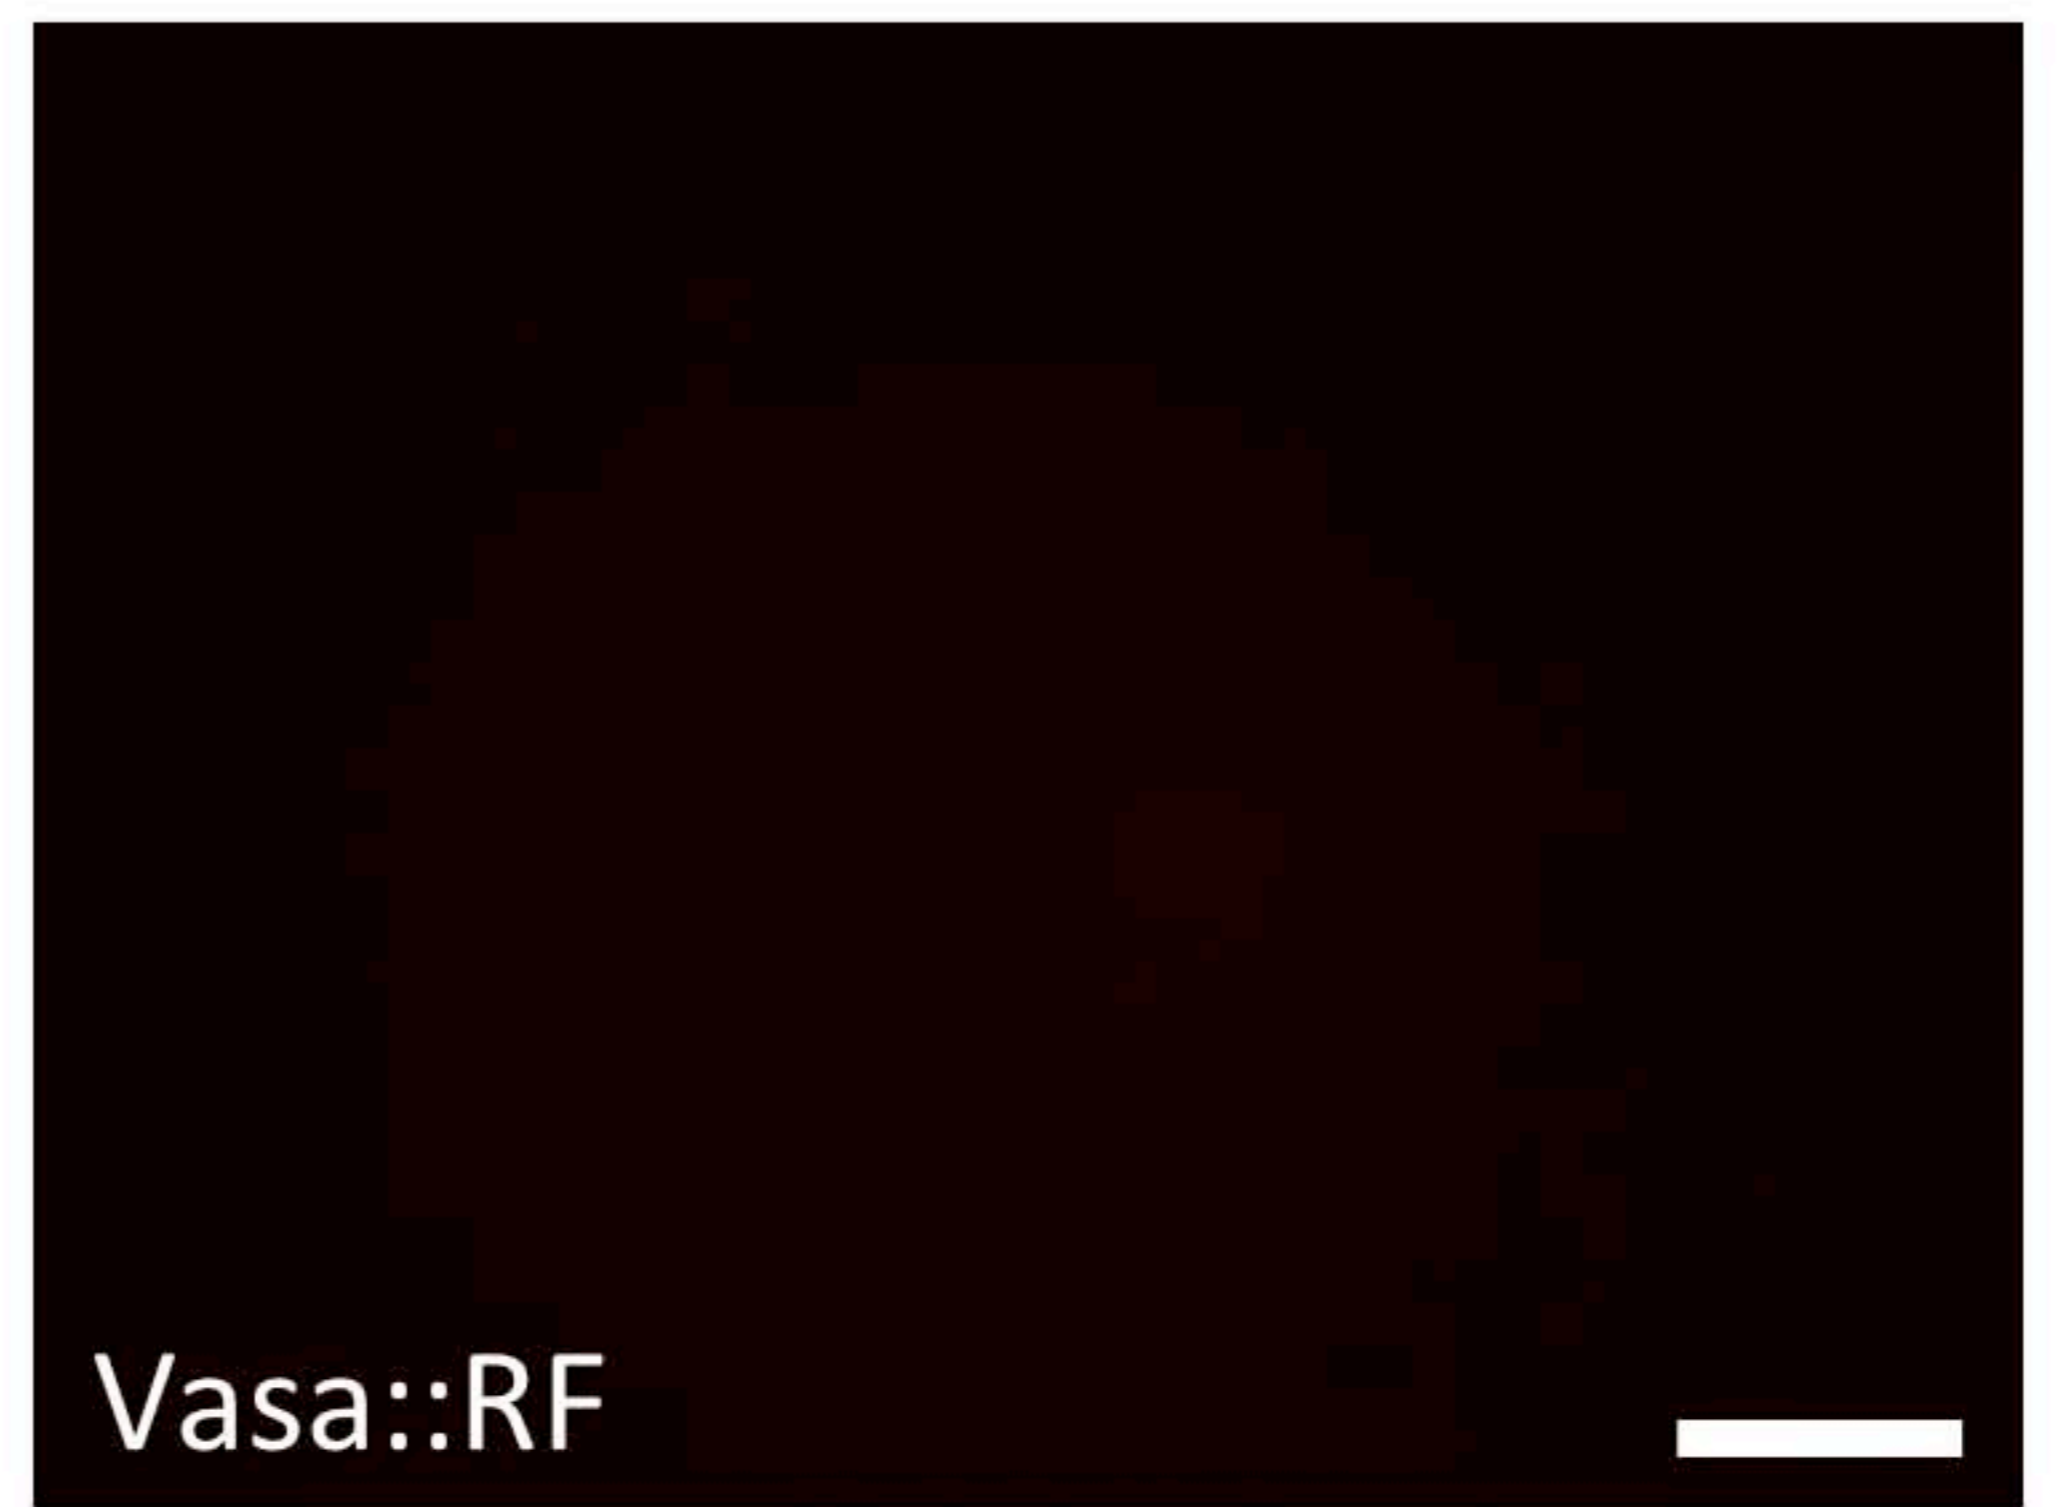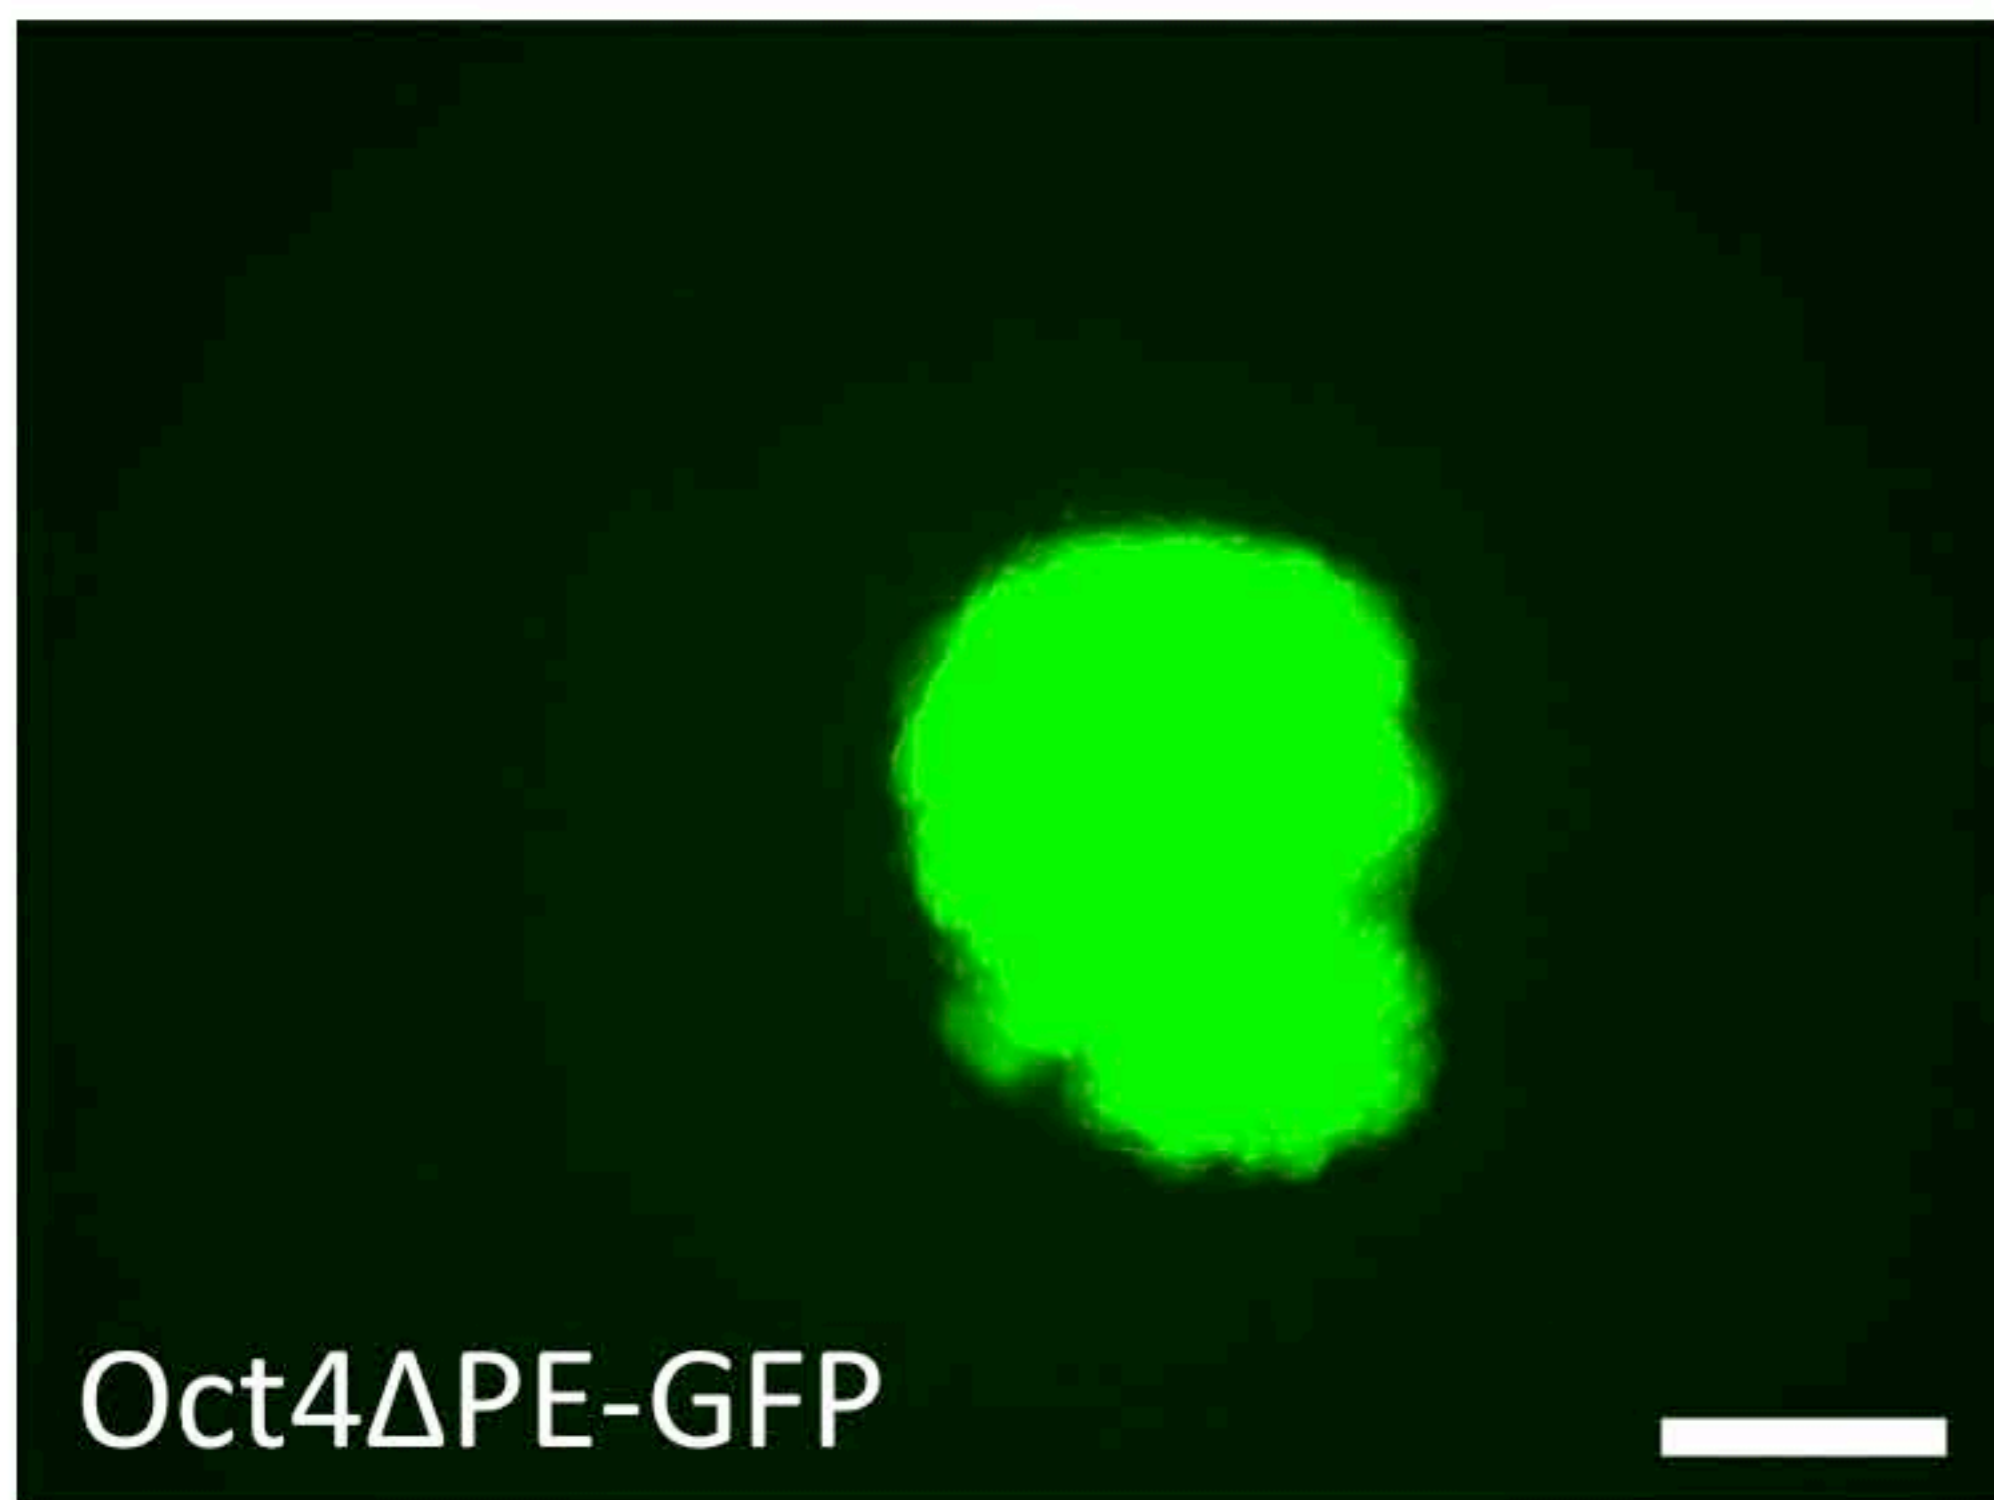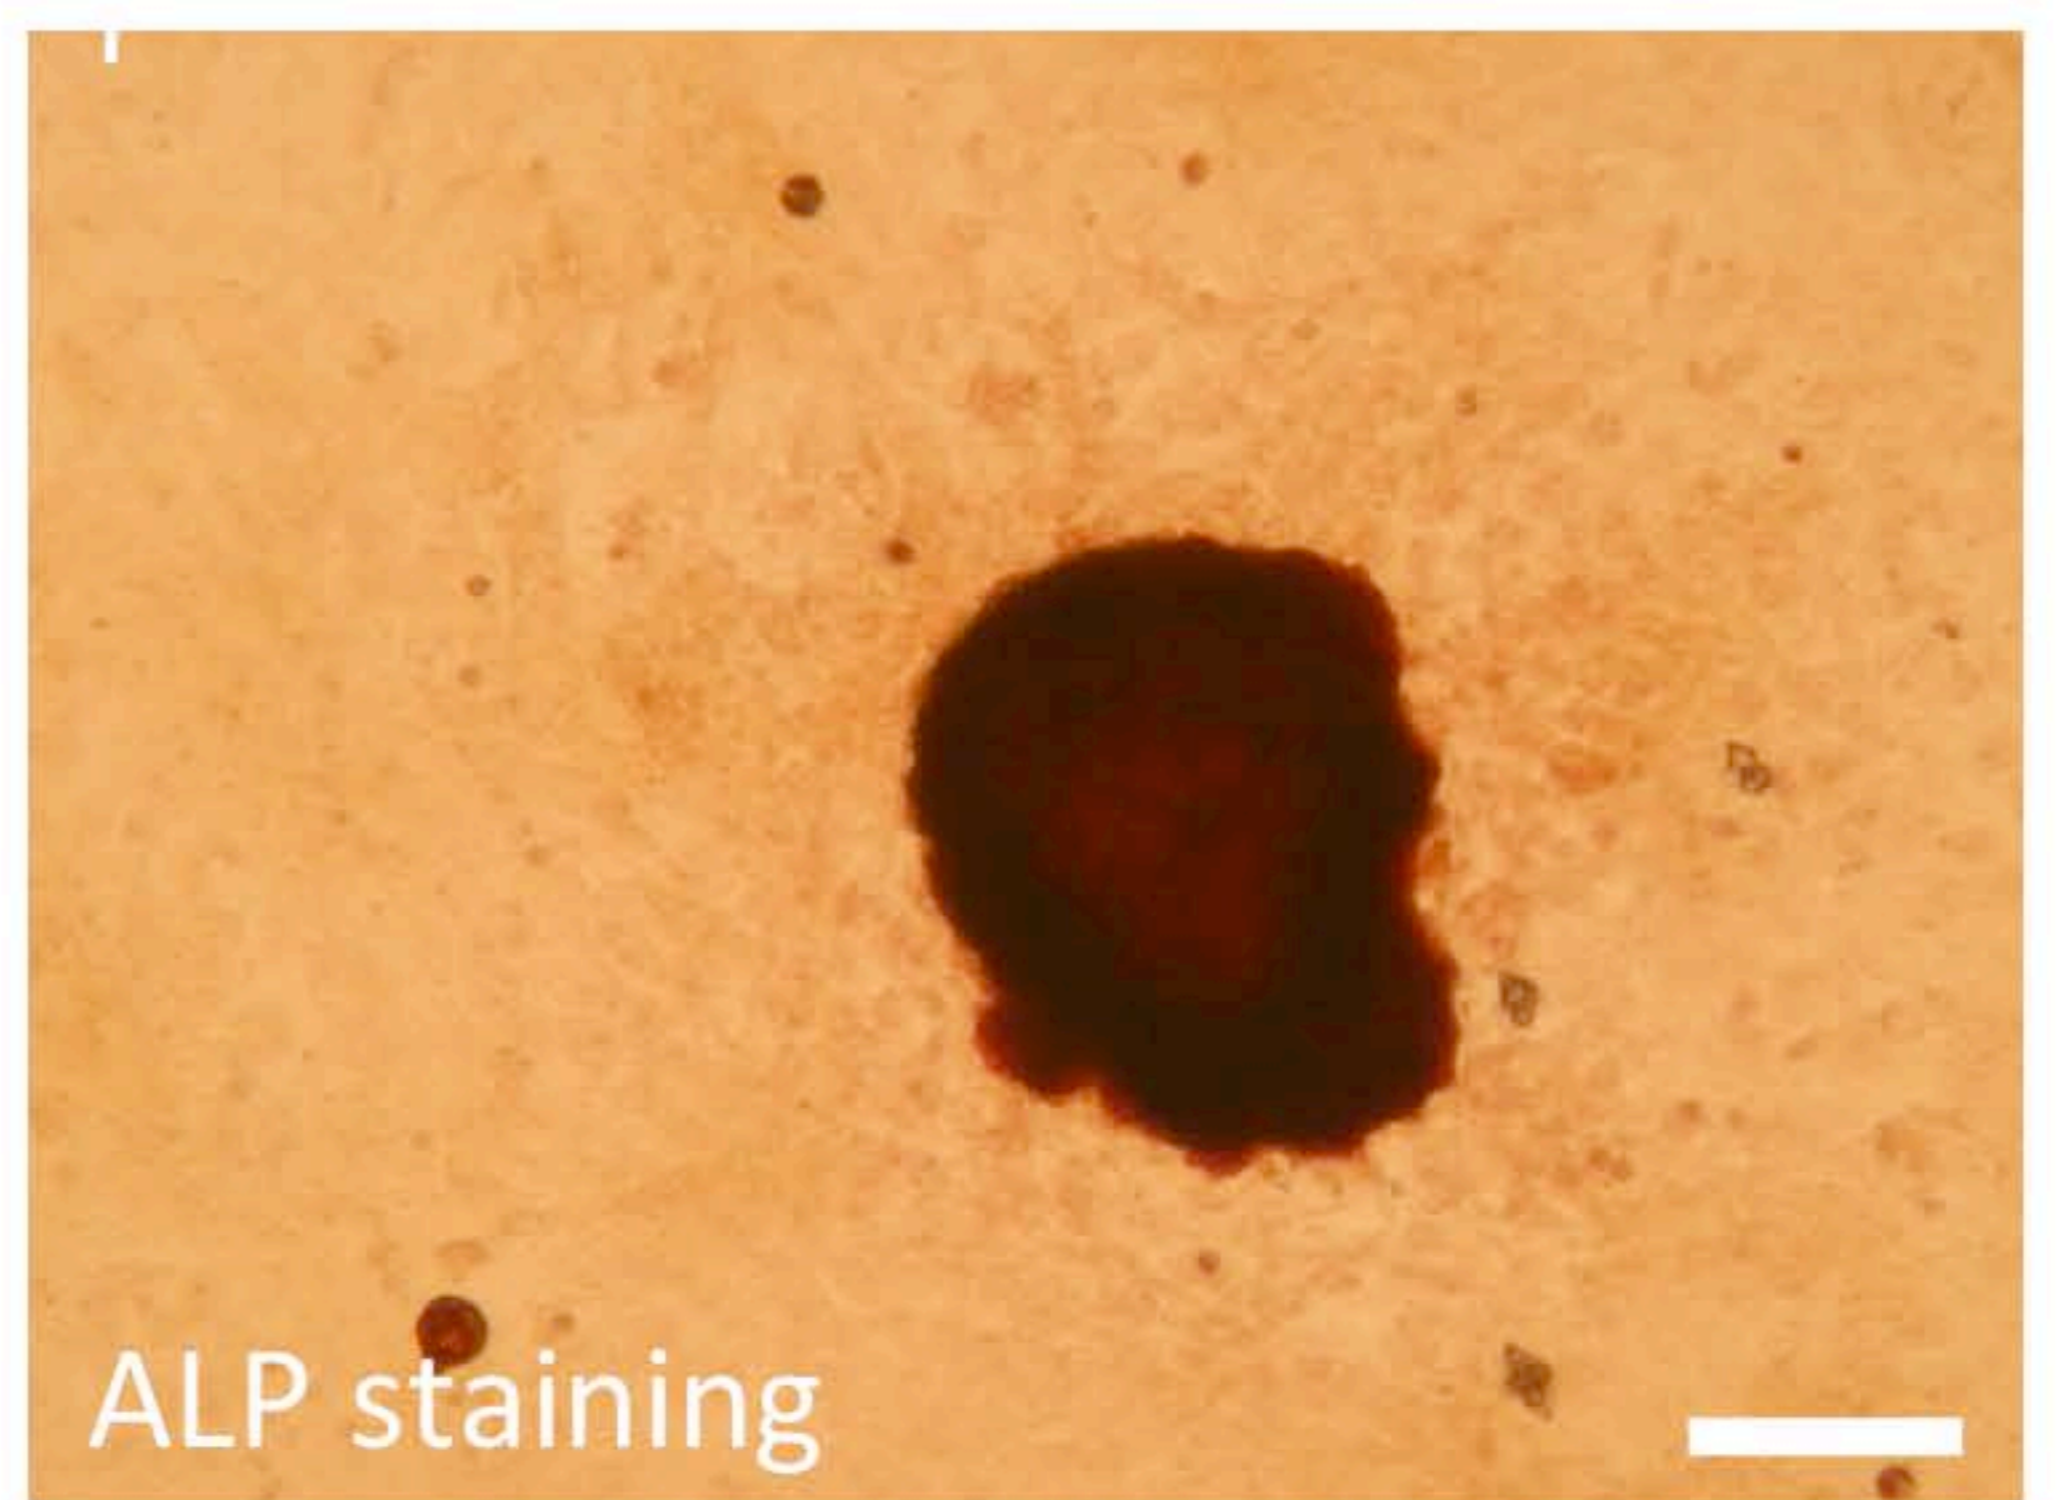**b**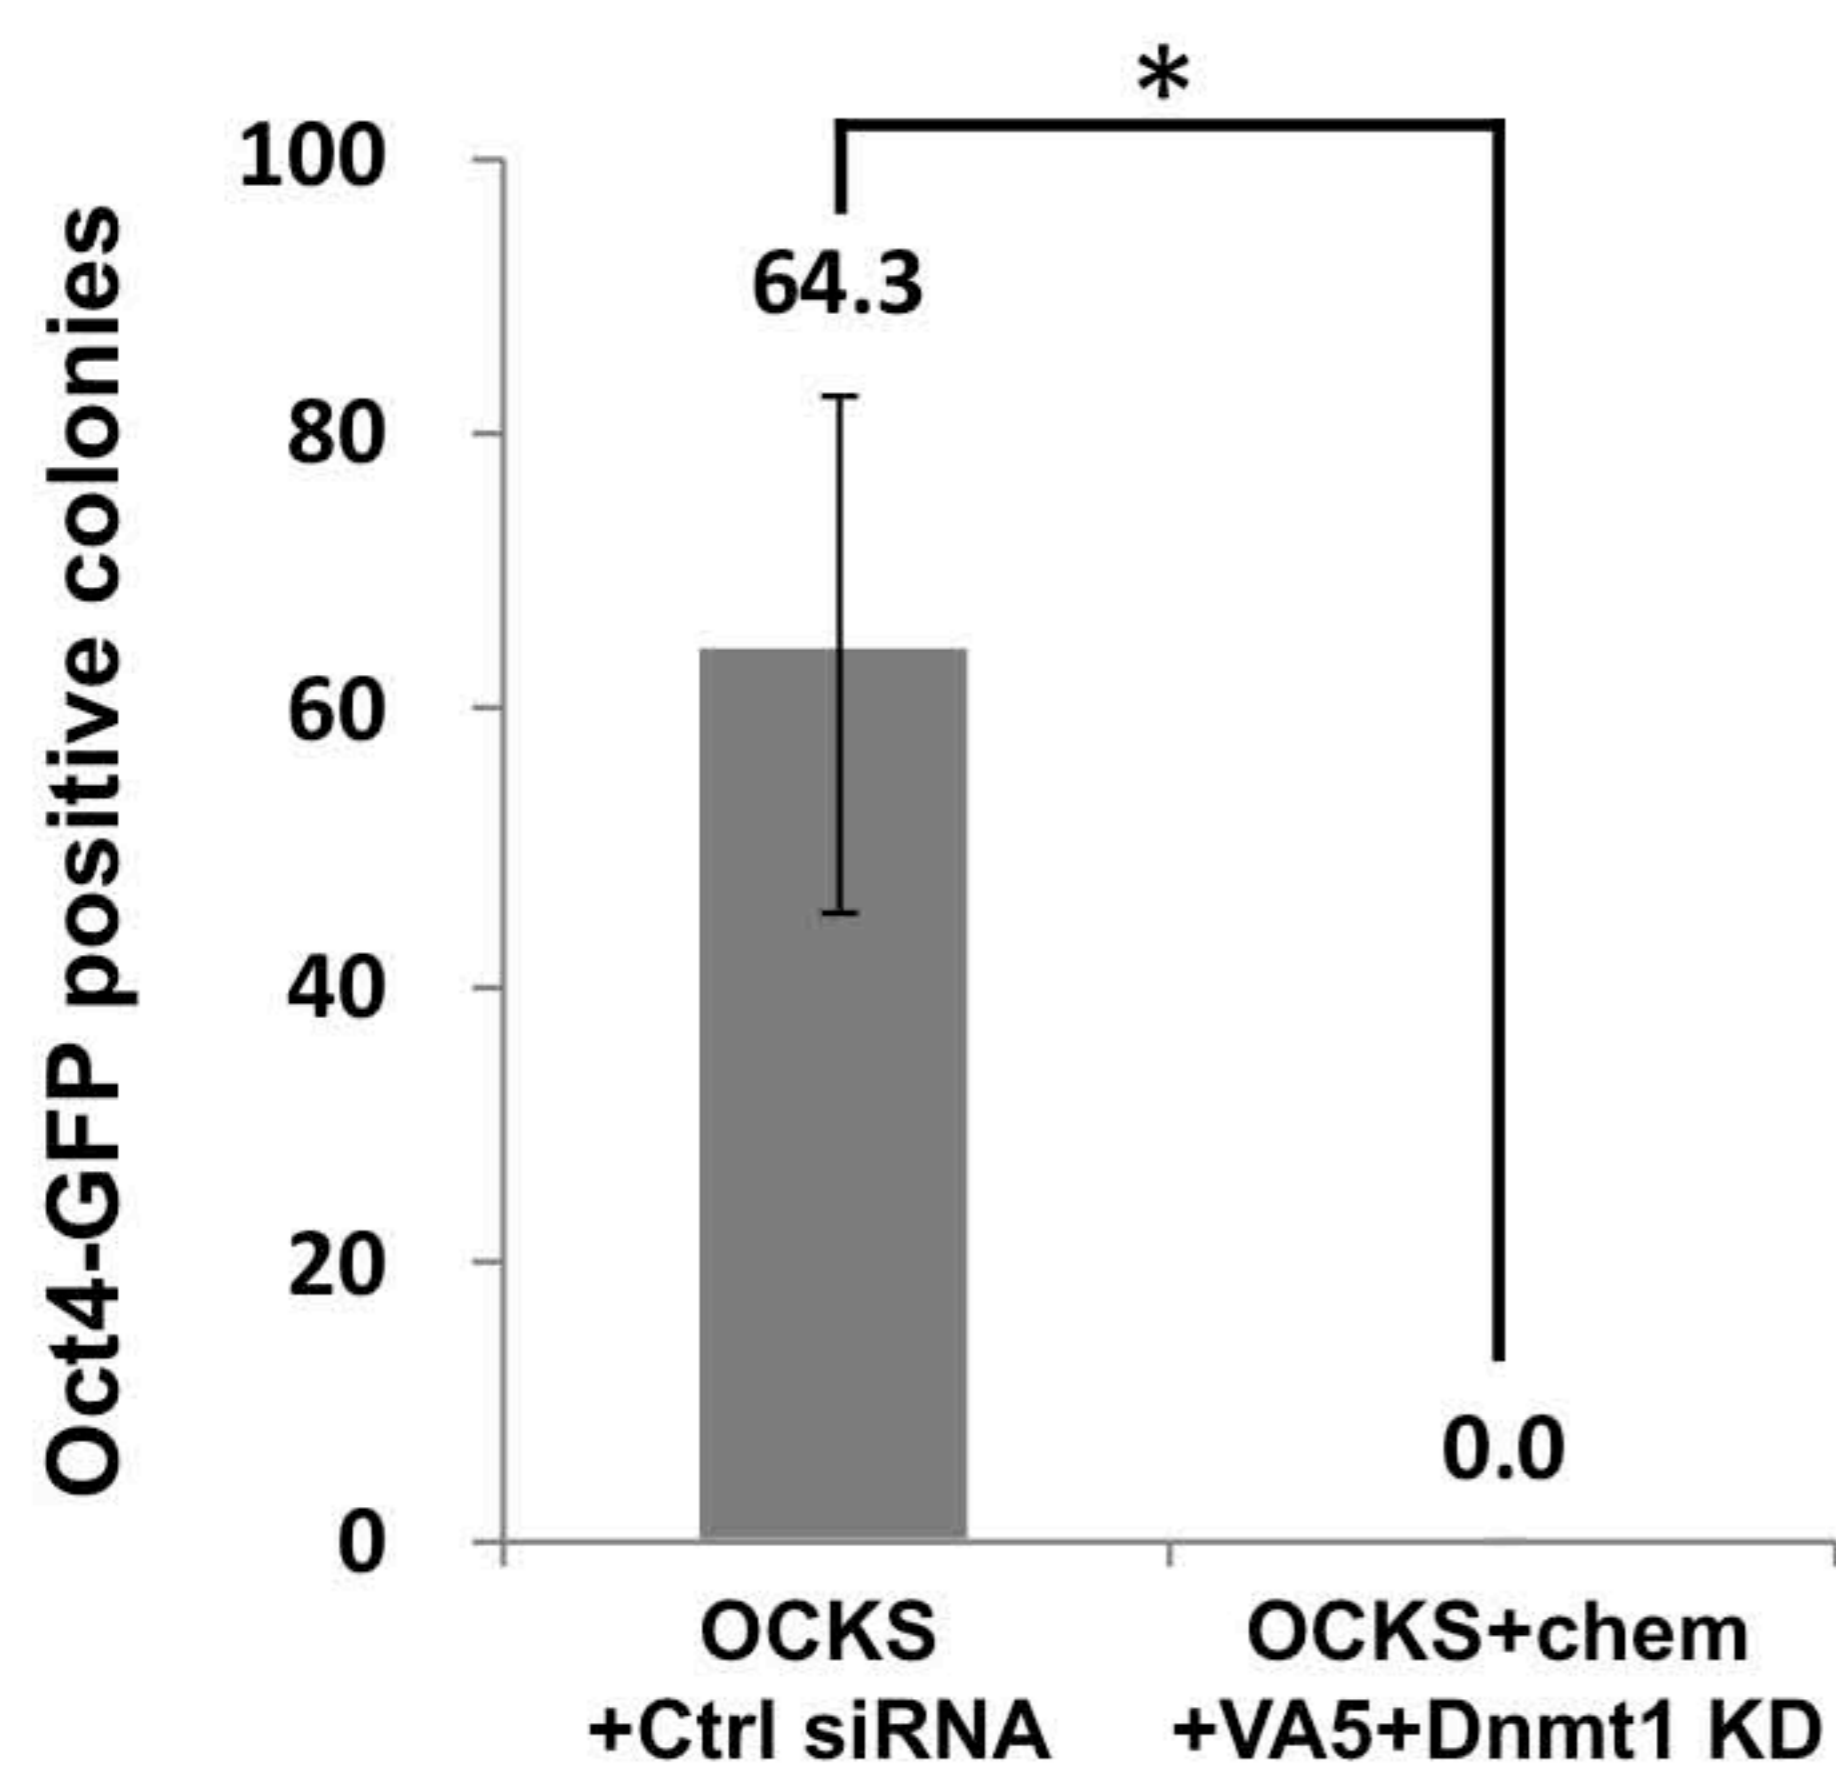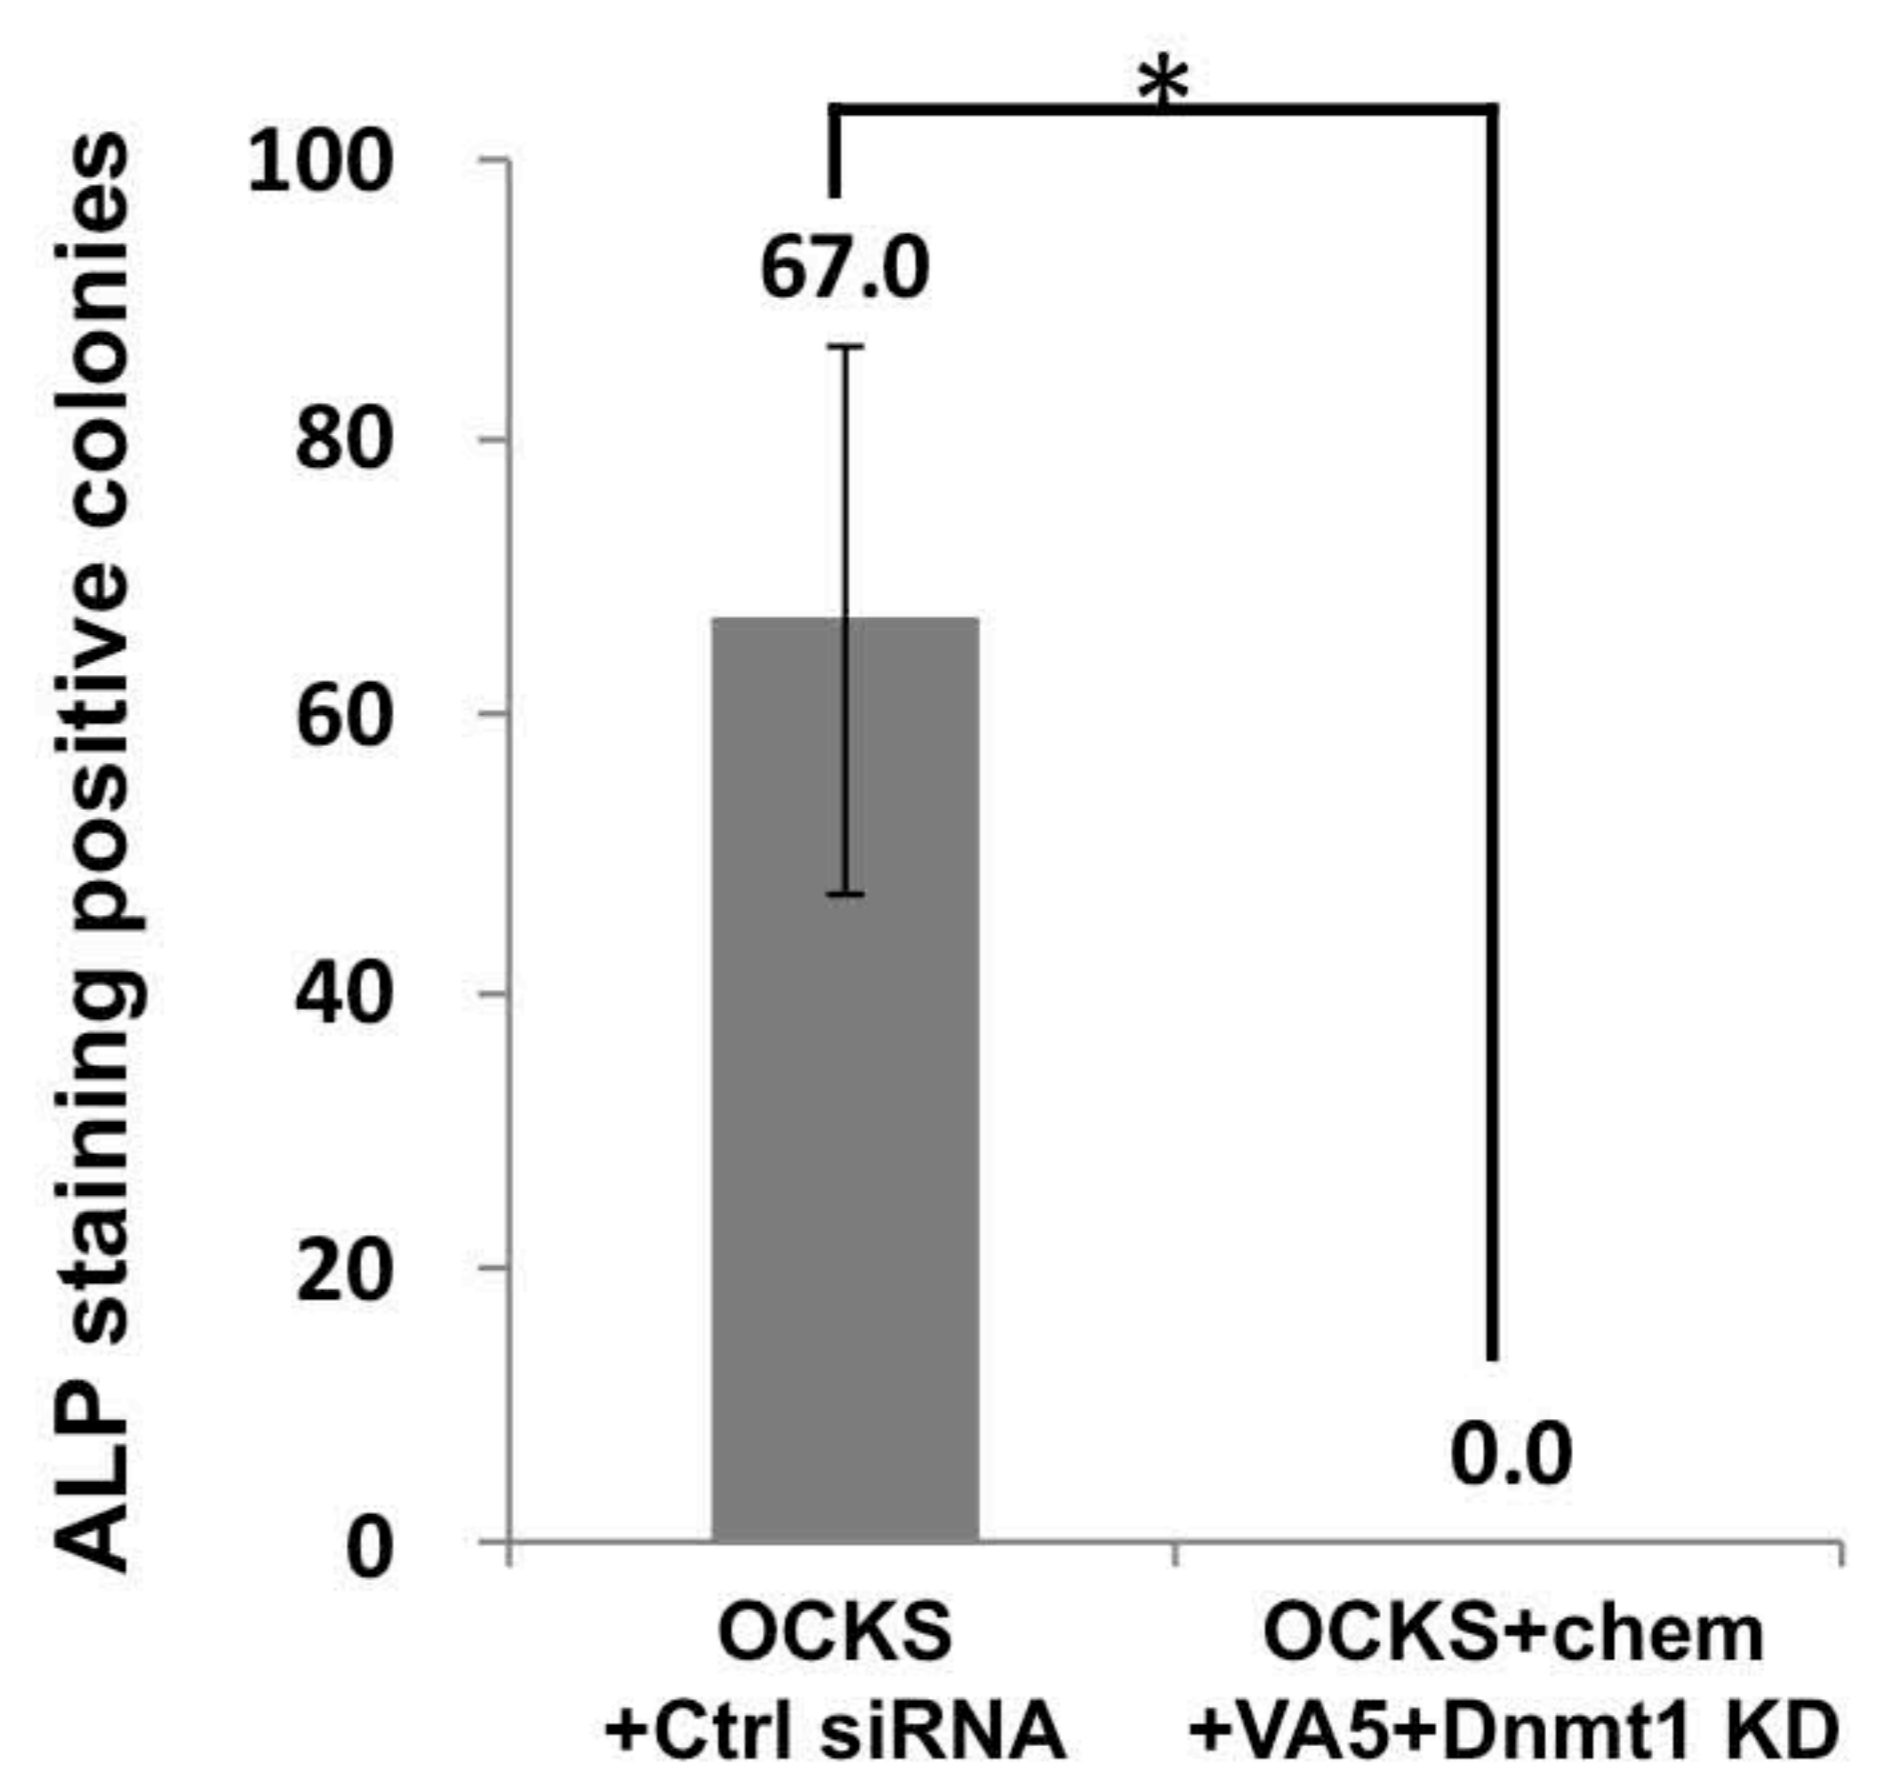

**Blimp1**

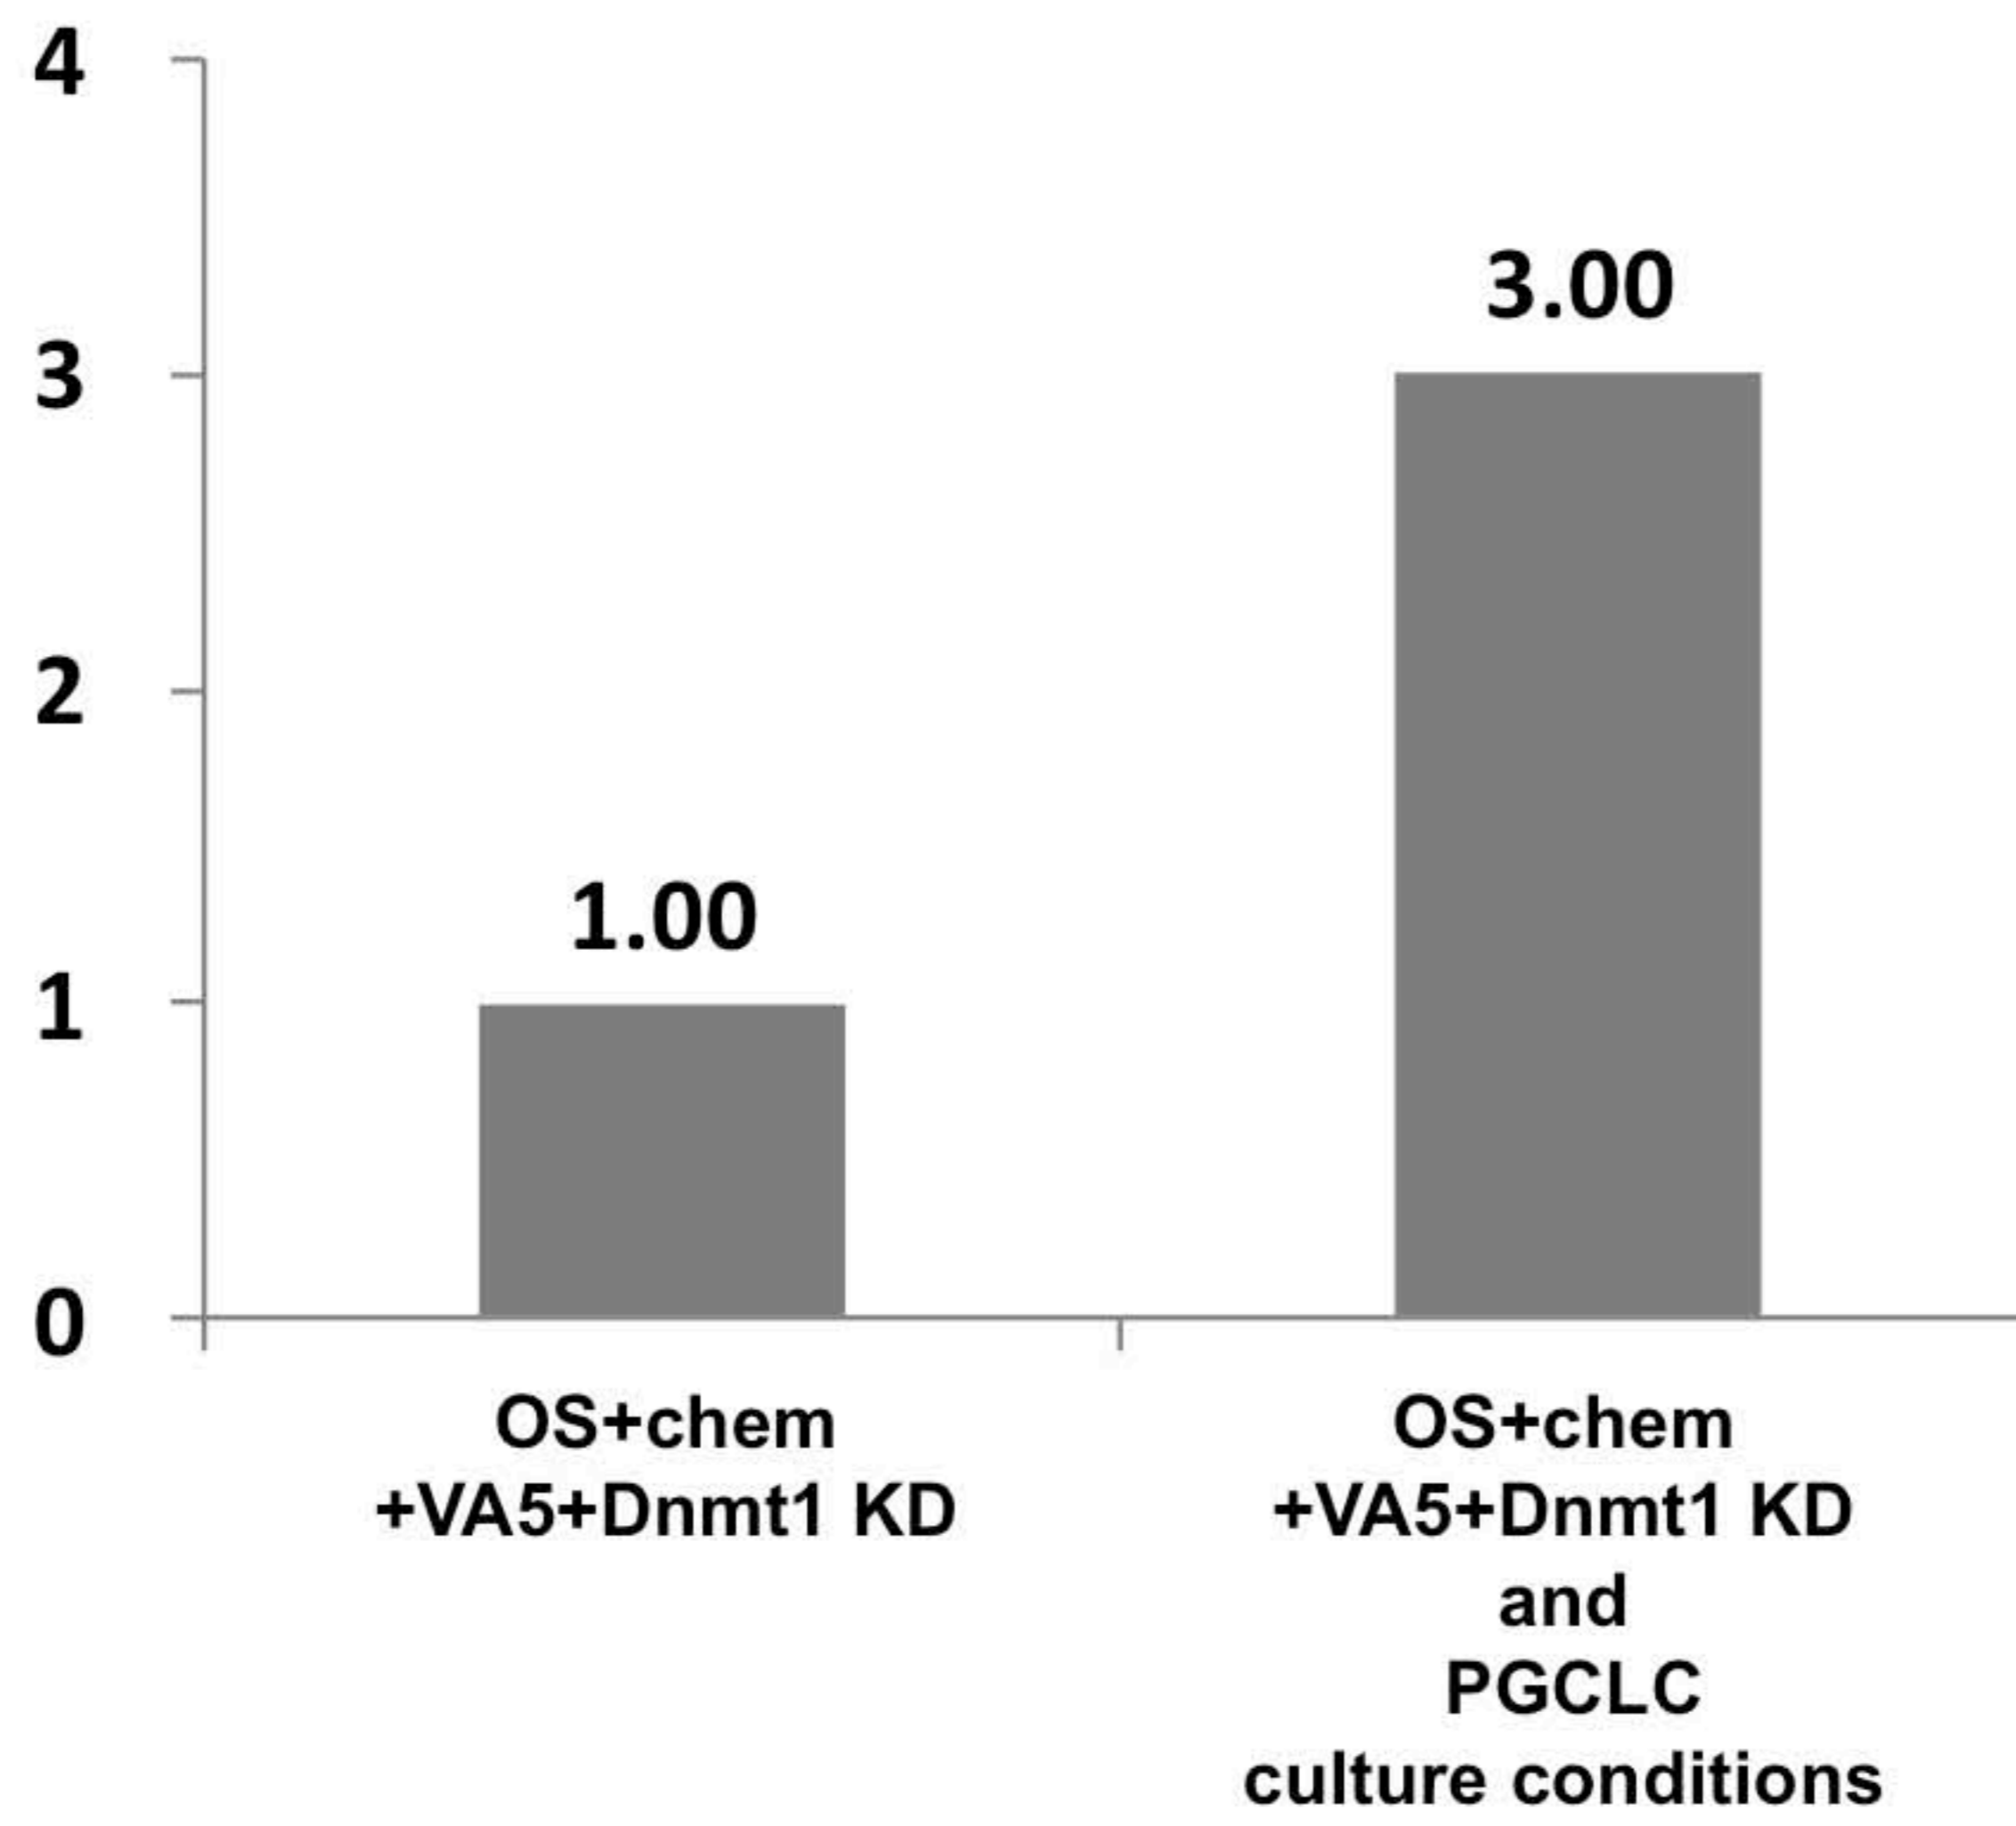

**Supplementary Table-S1 (Matsui)**  
**Details of small-molecule compounds**

| <b>Name</b>                     | <b>Source</b>                                       | <b>solvent</b> | <b>Concentration<br/>(<math>\mu</math>M)</b> |
|---------------------------------|-----------------------------------------------------|----------------|----------------------------------------------|
| Valproic Acid : VPA             | SIGMA<br>(Cat. No. P4543-10G)                       | Water          | 0.25 mM                                      |
| ALK5i (RepSox)                  | SIGMA<br>(Cat. No. P0158-5MG)                       | DMSO           | 5 $\mu$ M                                    |
| Tranylcypromine                 | Enzo Life Sciences<br>(Cat. No. BML-<br>EI217-0001) | Water          | 2.5 $\mu$ M                                  |
| BIX-01294                       | STEMGENT<br>(Cat. No. 04-0002)                      | DMSO           | 0.5 $\mu$ M                                  |
| 3-Deazaneplanocin :<br>DZNep    | Selleck Chemicals<br>(Cat. No. S7120)               | Water          | 50 nM                                        |
| 5'-Azacytidine :<br>Azacytidine | Active Motif<br>(Cat. No. 14103)                    | Water          | 10 $\mu$ M                                   |

**Supplementary Table-S2 (Matsui)**  
**Primers for real-time qPCR, bisulfite sequencing, ChIP-qPCR**

| Using                | Target        | Forward                        | Reverse                      |
|----------------------|---------------|--------------------------------|------------------------------|
| real-time qPCR       | Ppia          | GAGCTGTTTGCAGACAAAGTTC         | CCCTGGCACATGAATCCTGG         |
|                      | Arbp          | AGATTCGGGATATGCTGTTGGC         | TCGGGTCCTAGACCAGTGTTCC       |
|                      | Vasa          | GGACGAGATTTGATGGCTTGTGC        | AGCGACTGGCAGTTATTCCATCC      |
|                      | Dazl          | TGACGTGGATGTGCAGAAGATAG        | CAAAGGACGTGGCTGCACATGA       |
|                      | Stra8         | CAGCTTAGAGGAGGTCAAGGAAG        | AGCATCTGGTCCAACAGCCTCA       |
|                      | Blimp1        | TTCTCTTGGA AAAACGTGTGGG        | GGAGCCGGAGCTAGACTTG          |
|                      | Stella        | CCAAGAGAAGGGTCCGCACTTT         | GCAGAGACATCTGAATGGCTCAC      |
|                      | Nanos3        | GGGCTACACTTCTGTCTACTGC         | TTCCTGCCACTTTTGGAACCT        |
|                      | Hoxa1         | AGCCACCAAGAAGCCTGTCGTT         | TTGACCCACGTAGCCGTACTCT       |
|                      | Hoxb1         | GAATCGCCTTGCTCGTCAGAAC         | CGTGGTGAAGTTTGTGCGGAGA       |
| bisulfite sequencing | Dazl_outer    | GTGGTTTGGTTATTGTTGTGTTTTT      | TCCTACCACTCCCTAACCCC         |
|                      | Dazl_inner    | GGAAGAAAAAAATTAAGTTTTGATGGT    | TCCTACCACTCCCTAACCCC         |
|                      | Tex19.1_outer | TGTGTTTAGGTTGTAGTTGAGAATTGAG   | ATAAACTCCAAAACCAAACCTCTCCTC  |
|                      | Tex19.1_inner | TGTGTTTAGGTTGTAGTTGAGAATTGAG   | AACTCATTTACATATCTCCATAAAATCC |
|                      | Sycp1_outer   | ATGGGGTTTATGGTTGTAGTATAGGATTTA | ACTTCCCCTCAAACCTCCTAAAA      |
|                      | Sycp1_inner   | TTATGGTTGTAGTATAGGATTTATGTTTGG | CCCTCAAACCTCCTAAAAACC        |
| ChIP-qPCR            | Dazl_TSS      | CTACGTGAGGTGGCTGCCTA           | CCTATTGGCTGTAGCACGTCA        |
|                      | Tex19.1_TSS   | GGGACCTCATGGGAGATATGTA         | CTCTCCTCGCTAAGCACTGAA        |
|                      | Sycp1_TSS     | TGGACCAACCGTTAAATTGAG          | CCTTTATGAAGACGACATGGAAC      |



## Supplementary Table-S3 (Matsui)

**A list of meiosis-related genes commonly upregulated in MEFs cultured in OS+chem+VA5+Dnmt1 KD condition and in E13.5 male PGCs (related to Fig. 4d)**

| Probe Name    | Fold change | GeneSymbol | GenbankAccession | GeneName                                                         |
|---------------|-------------|------------|------------------|------------------------------------------------------------------|
| A_51_P245533  | 557.9       | Tex19.1    | NM_028602        | testis expressed gene 19.1                                       |
| A_52_P271166  | 137.5       | Dazl       | NM_010021        | deleted in azoospermia-like                                      |
| A_55_P2185143 | 45.6        | Fkbp6      | NM_001277891     | FK506 binding protein 6                                          |
| A_55_P2018403 | 33.0        | Sycp1      | NM_011516        | synaptonemal complex protein 1                                   |
| A_51_P444137  | 25.9        | Syce1      | NM_001143765     | synaptonemal complex central element protein 1                   |
| A_52_P346225  | 23.7        | Asz1       | NM_023729        | ankyrin repeat, SAM and basic leucine zipper domain containing 1 |
| A_55_P1989369 | 18.4        | Tdrd9      | NM_029056        | tudor domain containing 9                                        |
| A_51_P116609  | 17.0        | Tex12      | NM_025687        | testis expressed gene 12                                         |
| A_55_P1974869 | 15.2        | Hormad1    | NM_001289537     | HORMA domain containing 1                                        |
| A_55_P1952385 | 14.0        | Fkbp6      | NM_001277891     | FK506 binding protein 6                                          |
| A_55_P2168168 | 13.3        | Tex11      | NM_031384        | testis expressed gene 11                                         |
| A_55_P2008417 | 12.9        | Mnd1       | NM_029797        | meiotic nuclear divisions 1 homolog (S. cerevisiae)              |
| A_66_P138584  | 12.8        | Mnd1       | NM_029797        | meiotic nuclear divisions 1 homolog (S. cerevisiae)              |
| A_51_P274465  | 12.5        | Sycp3      | Y08485           | synaptonemal complex protein 3                                   |
| A_55_P1973427 | 9.5         | Tex14      | NM_001199293     | testis expressed gene 14                                         |
| A_55_P1986208 | 8.9         | Ccnb1ip1   | NM_001111119     | cyclin B1 interacting protein 1                                  |
| A_51_P494751  | 8.0         | Mael       | NM_175296        | maelstrom homolog (Drosophila)                                   |
| A_51_P329818  | 7.7         | Dpep3      | NM_027960        | dipeptidase 3                                                    |
| A_55_P2018407 | 7.4         | Sycp3      | NM_011517        | synaptonemal complex protein 3                                   |
| A_51_P497870  | 6.4         | Hormad1    | NM_026489        | HORMA domain containing 1                                        |
| A_55_P2093705 | 5.8         | Meig1      | NM_008579        | meiosis expressed gene 1                                         |
| A_51_P494822  | 5.7         | Stag3      | NM_016964        | stromal antigen 3                                                |
| A_51_P244303  | 5.6         | Smc1b      | NM_080470        | structural maintenance of chromosomes 1B                         |
| A_55_P2064180 | 5.2         | Hormad1    | NM_001289534     | HORMA domain containing 1                                        |
| A_51_P242967  | 4.8         | Piwil2     | NM_021308        | piwi-like RNA-mediated gene silencing 2                          |
| A_52_P70787   | 4.5         | Brdt       | NM_054054        | bromodomain, testis-specific                                     |
| A_51_P142421  | 4.0         | Rspo1      | NM_138683        | R-spondin homolog (Xenopus laevis)                               |
| A_55_P2093704 | 4.0         | Meig1      | NM_008579        | meiosis expressed gene 1                                         |
| A_55_P2046753 | 3.0         | Piwil4     | NM_177905        | piwi-like RNA-mediated gene silencing 4                          |
| A_51_P125679  | 2.2         | Rec114     | NM_028598        | REC114 meiotic recombination protein                             |
| A_55_P2011121 | 2.1         | Meiob      | NM_029197        | meiosis specific with OB domains                                 |

## Supplementary Table-S4 (Matsui)

**A list of meiosis-related genes commonly upregulated in MEFs cultured in OCKS+chem+VA5+Dnmt1 KD condition and in E13.5 male PGCs (related to Supplementary Fig. S8d)**

| Probe Name    | Fold change | GeneSymbol | GenbankAccession | GeneName                                                         |
|---------------|-------------|------------|------------------|------------------------------------------------------------------|
| A_51_P245533  | 797.3       | Tex19.1    | NM_028602        | testis expressed gene 19.1                                       |
| A_52_P271166  | 111.7       | Dazl       | NM_010021        | deleted in azoospermia-like                                      |
| A_55_P2185143 | 59.6        | Fkbp6      | NM_001277891     | FK506 binding protein 6                                          |
| A_55_P2018403 | 28.5        | Sycp1      | NM_011516        | synaptonemal complex protein 1                                   |
| A_51_P444137  | 28.4        | Syce1      | NM_001143765     | synaptonemal complex central element protein 1                   |
| A_52_P346225  | 25.2        | Asz1       | NM_023729        | ankyrin repeat, SAM and basic leucine zipper domain containing 1 |
| A_55_P1989369 | 22.1        | Tdrd9      | NM_029056        | tudor domain containing 9                                        |
| A_55_P1952385 | 18.7        | Fkbp6      | NM_001277891     | FK506 binding protein 6                                          |
| A_55_P1974869 | 16.0        | Hormad1    | NM_001289537     | HORMA domain containing 1                                        |
| A_51_P116609  | 14.3        | Tex12      | NM_025687        | testis expressed gene 12                                         |
| A_55_P2168168 | 13.3        | Tex11      | NM_031384        | testis expressed gene 11                                         |
| A_55_P2008417 | 12.4        | Mnd1       | NM_029797        | meiotic nuclear divisions 1 homolog (S. cerevisiae)              |
| A_51_P274465  | 12.3        | Sycp3      | Y08485           | synaptonemal complex protein 3                                   |
| A_66_P138584  | 12.2        | Mnd1       | NM_029797        | meiotic nuclear divisions 1 homolog (S. cerevisiae)              |
| A_55_P2018407 | 9.3         | Sycp3      | NM_011517        | synaptonemal complex protein 3                                   |
| A_55_P1973427 | 8.8         | Tex14      | NM_001199293     | testis expressed gene 14                                         |
| A_55_P1986208 | 8.5         | Ccnb1ip1   | NM_001111119     | cyclin B1 interacting protein 1                                  |
| A_51_P494822  | 7.8         | Stag3      | NM_016964        | stromal antigen 3                                                |
| A_51_P329818  | 7.5         | Dpep3      | NM_027960        | dipeptidase 3                                                    |
| A_55_P2093705 | 6.4         | Meig1      | NM_008579        | meiosis expressed gene 1                                         |
| A_51_P494751  | 6.1         | Mael       | NM_175296        | maelstrom homolog (Drosophila)                                   |
| A_51_P244303  | 5.6         | Smc1b      | NM_080470        | structural maintenance of chromosomes 1B                         |
| A_51_P242967  | 5.3         | Piwil2     | NM_021308        | piwi-like RNA-mediated gene silencing 2                          |
| A_55_P2064180 | 4.9         | Hormad1    | NM_001289534     | HORMA domain containing 1                                        |
| A_51_P497870  | 4.9         | Hormad1    | NM_026489        | HORMA domain containing 1                                        |
| A_55_P2093704 | 4.4         | Meig1      | NM_008579        | meiosis expressed gene 1                                         |
| A_52_P70787   | 3.8         | Brdt       | NM_054054        | bromodomain, testis-specific                                     |
| A_55_P2046753 | 2.5         | Piwil4     | NM_177905        | piwi-like RNA-mediated gene silencing 4                          |
| A_66_P107007  | 2.5         | Msh4       | NM_031870        | mutS homolog 4 (E. coli)                                         |
| A_55_P2208041 | 2.1         | Stra8      | NM_009292        | stimulated by retinoic acid gene 8                               |
| A_51_P125679  | 2.1         | Rec114     | NM_028598        | REC114 meiotic recombination protein                             |
